# Supplementary material
Source: Copernicus journal article supplement (doi:10.5194/essd-18-3211-2026)
Supplement: Supplementary file 1 [file essd-18-3211-2026-supplement.pdf]

Supplement of Earth Syst. Sci. Data, 18, 3211–3288, 2026  
<https://doi.org/10.5194/essd-18-3211-2026-supplement>  
© Author(s) 2026. CC BY 4.0 License.

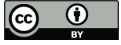

Open Access  
Earth System  
Science  
Data

*Supplement of*  
**Global Carbon Budget 2025**

**Pierre Friedlingstein et al.**

*Correspondence to:* Pierre Friedlingstein (p.friedlingstein@exeter.ac.uk)

The copyright of individual parts of the supplement might differ from the article licence.

# 1 **Global Carbon Budget 2025 - Supplementary Information**

## 2 **S.1 Methodology Fossil Fuel CO<sub>2</sub> emissions (E<sub>FOS</sub>)**

### 3 ***S.1.1 Cement carbonation***

4 From the moment it is created, cement begins to absorb CO<sub>2</sub> from the atmosphere, a process known as ‘cement  
5 carbonation’. We estimate this CO<sub>2</sub> sink, from 1931 onwards, as the average of two studies in the literature (Cao  
6 et al., 2020; Guo et al., 2021 extended by Huang et al., 2023). The Global Cement and Concrete Association  
7 reports a much lower carbonation rate, but this is based on the highly conservative assumption of 0% mortar  
8 (GCCA, 2021). Modelling cement carbonation requires estimation of a large number of parameters, including  
9 the different types of cement material in different countries, the lifetime of the structures before demolition, of  
10 cement waste after demolition, and the volumetric properties of structures, among others (Xi et al., 2016).  
11 Lifetime is an important parameter because demolition results in the exposure of new surfaces to the  
12 carbonation process. The main reasons for differences between the two studies appear to be the assumed  
13 lifetimes of cement structures and the geographic resolution, but the uncertainty bounds of the two studies  
14 overlap.

### 15 ***S.1.2 Emissions embodied in goods and services***

16 Our national emission statistics are in line with IPCC reporting guidelines and ‘include greenhouse gas  
17 emissions and removals taking place within national territory and offshore areas over which the country has  
18 jurisdiction’ (Rypdal et al., 2006), and are called territorial emission inventories. Consumption-based emission  
19 inventories allocate emissions to products that are consumed within a country and are conceptually calculated as  
20 the territorial emissions minus the ‘embodied’ territorial emissions to produce exported products plus the  
21 emissions in other countries to produce imported products (Consumption = Territorial – Exports + Imports).  
22 Consumption-based emission attribution results (e.g. Davis and Caldeira, 2010) provide additional information  
23 to territorial-based emissions that can be used to understand emission drivers (Hertwich and Peters, 2009) and  
24 quantify emission transfers by the trade of products between countries (Peters et al., 2011a). The consumption-  
25 based emissions have the same global total but reflect the trade-driven movement of emissions between  
26 countries in response to human activities.

27 We estimate consumption-based emissions from 1990 by enumerating the global supply chain using a global  
28 model of the economic relationships between economic sectors within and between every country (Andrew and  
29 Peters, 2013; Peters et al., 2011b). Our analysis is based on the economic and trade data from the Global Trade  
30 and Analysis Project (GTAP; Narayanan et al., 2015), and we make detailed estimates for the years 1997  
31 (GTAP version 5), 2001 (GTAP6), and 2004, 2007, 2011, 2014, and 2017 (GTAP11.0), covering 57 sectors and  
32 141 countries and regions. The detailed results are then extended into an annual time series from 1990 to the  
33 latest year of the Gross Domestic Product (GDP) data (typically one year less than the territorial emissions  
34 data), using GDP data by expenditure in current exchange rate of US dollars (USD; from the UN National  
35 Accounts main Aggregates database; UN, 2025) and time series of trade data from GTAP (based on the  
36 methodology in Peters et al., 2011b). We estimate the sector-level CO<sub>2</sub> emissions using the GTAP data and

37 methodology, add the flaring and cement emissions from our fossil CO<sub>2</sub> dataset, and then scale the national  
38 totals (excluding bunker fuels) to match the emission estimates from the carbon budget. We do not provide a  
39 separate uncertainty estimate for the consumption-based emissions, but based on model comparisons and  
40 sensitivity analysis, they are unlikely to be significantly different than for the territorial emission estimates  
41 (Peters et al., 2012b).

### 42 **S.1.3 Uncertainty assessment for $E_{FOS}$**

43 We estimate the uncertainty of the global fossil CO<sub>2</sub> emissions at  $\pm 5\%$  (scaled down from the published  $\pm 10\%$   
44 at  $\pm 2\sigma$  to the use of  $\pm 1\sigma$  bounds reported here; Andres et al., 2012). This is consistent with a more detailed  
45 analysis of uncertainty of  $\pm 8.4\%$  at  $\pm 2\sigma$  (Andres et al., 2014) and at the high-end of the range of  $\pm 5\text{-}10\%$  at  $\pm 2\sigma$   
46 reported by (Ballantyne et al., 2015). This includes an assessment of uncertainties in the amounts of fuel  
47 consumed, the carbon and heat contents of fuels, and the combustion efficiency. While we consider a fixed  
48 uncertainty of  $\pm 5\%$  for all years, the uncertainty as a percentage of emissions is growing with time because of  
49 the larger share of global emissions from emerging economies and developing countries (Marland et al., 2009).  
50 Generally, emissions from mature economies with good statistical processes have an uncertainty of only a few  
51 per cent (Marland, 2008), while emissions from strongly developing economies such as China have  
52 uncertainties of around  $\pm 10\%$  (for  $\pm 1\sigma$ ; Gregg et al., 2008; Andres et al., 2014). Uncertainties of emissions are  
53 likely to be mainly systematic errors related to underlying biases of energy statistics and to the accounting  
54 method used by each country.

### 55 **S.1.4 Growth rate in emissions**

56 We report the annual growth rate in emissions for adjacent years (in percent per year) by calculating the  
57 difference between the two years and then normalising to the emissions in the first year:  $(E_{FOS}(t_0+1)-$   
58  $E_{FOS}(t_0))/E_{FOS}(t_0) \times 100\%$ . We apply a leap-year adjustment where relevant to ensure valid interpretations of  
59 annual growth rates. This affects the growth rate by about  $0.3\% \text{ yr}^{-1}$  ( $1/366$ ) and causes calculated growth rates  
60 to go up approximately  $0.3\%$  if the first year is a leap year and down  $0.3\%$  if the second year is a leap year.

61 The relative growth rate of  $E_{FOS}$  over time periods of greater than one year can be rewritten using its logarithm  
62 equivalent as follows:

$$63 \frac{1}{E_{FOS}} \frac{dE_{FOS}}{dt} = \frac{d(\ln E_{FOS})}{dt} \quad (\text{S1})$$

64 Here we calculate relative growth rates in emissions for multi-year periods (e.g. a decade) by fitting a linear  
65 trend to  $\ln(E_{FOS})$  in Eq. (S1), reported in percent per year. We define the average growth rate over a decadal  
66 period to include the growth in the first year. For example, when calculating the growth rate of 2000-2009, we  
67 include the growth rate in the year 2000, thus the regression is for the years 1999-2009, otherwise the growth  
68 from 1999-2000 would not be included in either 1990-1999 or 2000-2009 time periods.

### 69 **S.1.5 Emissions projection for 2025**

70 To gain insight on emission trends for 2025, we provide an assessment of global fossil CO<sub>2</sub> emissions,  $E_{FOS}$ , by  
71 combining individual assessments of emissions for China, USA, the EU India, and Japan (four of the six  
72 countries/regions with the largest emissions), and the rest of the world.

73 The methods are specific to each country or region, as described in detail below.

74 **China:** We rely primarily on the National Bureau of Statistics' (NBS) Statistical Communiqué, published in late  
75 February with the first official data for the full year of 2025. Specifically, we use growth rates for coal, oil, and  
76 natural gas derived from the information on energy shares. For cement we use annual data from the NBS.

77 **USA:** We use emissions estimated by the U.S. Energy Information Administration (EIA) in their Short-Term  
78 Energy Outlook (STEO) for emissions from fossil fuels (EIA, 2025). We combine this with our estimate of  
79 emissions from cement production using the monthly U.S. cement clinker production data from USGS for  
80 January-November 2025, assuming changes in clinker production over the first part of the year apply throughout  
81 the year.

82 **India:** We use monthly emissions estimates for India updated from Andrew (2020b) through December 2025.  
83 These estimates are derived from many official monthly energy and other activity data sources to produce direct  
84 estimates of national CO<sub>2</sub> emissions, without the use of proxies.

85 **EU:** We use a refinement to the methods presented by Andrew (2021), deriving emissions from monthly energy  
86 data reported by Eurostat. Some data gaps are filled using data from the Joint Organisations Data Initiative  
87 (JODI, 2025). Sub-annual cement and cement-clinker production data are limited, but data for Germany, Poland  
88 and Spain, the three largest producers, are available, along with production indices for Italy and France. For all  
89 categories data are available through December 2025

90 **Japan:** We use a newly developed dataset of monthly emissions derived from official monthly activity data  
91 including energy flows and industrial production statistics (Kunimitsu & Andrew, *in preparation*). This gives  
92 robust estimates through December.

93 **International transport:** Given the divergence in behaviour of international shipping from countries' emissions  
94 since the COVID-19 pandemic, we project international bunkers separately. For aviation we use sub-annual data  
95 from the OECD (Clarke et al., 2022) extended using data on the number of flights from Airportia  
96 (<https://airportia.com/flights-monitor/>). For international shipping we combine information from the OECD's  
97 estimate of global shipping (Clarke et al., 2023), ShipAndBunker's collation of bunker sales data from the  
98 world's 20 top bunkering ports (<https://shipandbunker.com/bi/bunker-volumes>), VesselBot's estimates of  
99 container-ship emissions (<https://www.vesselbot.com/resources/>), and MarineBenchmark's estimates of global  
100 shipping emissions (<https://www.marinebenchmark.com/insights/>); all four of these sources agree qualitatively.

101 **Rest of the world:** For oil and gas emissions, we use the global oil demand forecast (EIA) and global gas  
102 demand forecast (IEA) and subtract the other regions explicitly modelled, and estimate uncertainty as the  
103 maximum absolute difference over the period available for such forecasts using the specific monthly editions of  
104 the respective forecasts. For coal and cement, we use the close relationship between the growth in GDP and the  
105 growth in emissions (Raupach et al., 2007) to project emissions for the current year. This is based on a  
106 simplified Kaya Identity, whereby  $E_{FOS}$  (GtC yr<sup>-1</sup>) is decomposed by the product of GDP (USD yr<sup>-1</sup>) and the  
107 fossil fuel carbon intensity of the economy ( $I_{FOS}$ ; GtC USD<sup>-1</sup>) as follows:

108 
$$E_{FOS} = GDP \times I_{FOS} \tag{S2}$$

109 Taking a time derivative of Equation (S2) and rearranging gives:

$$110 \quad \frac{1}{E_{FOS}} \frac{dE_{FOS}}{dt} = \frac{1}{GDP} \frac{dGDP}{dt} + \frac{1}{I_{FOS}} \frac{dI_{FOS}}{dt} \quad (S3)$$

111 where the left-hand term is the relative growth rate of  $E_{FOS}$ , and the right-hand terms are the relative growth  
 112 rates of GDP and  $I_{FOS}$ , respectively, which can simply be added linearly to give the overall growth rate.

113 The  $I_{FOS}$  is based on GDP in constant PPP (Purchasing Power Parity) from the International Energy Agency  
 114 (IEA) up to 2017 (IEA/OECD, 2019) and extended using the International Monetary Fund (IMF) growth rates  
 115 through 2024 (IMF, 2024). Interannual variability in  $I_{FOS}$  is the largest source of uncertainty in the GDP-based  
 116 emissions projections. We thus use the standard deviation of the annual  $I_{FOS}$  for the last decade as a measure of  
 117 uncertainty, reflecting a  $\pm 1\sigma$  as in the rest of the carbon budget.

118 **World:** The global total is the sum of each of the countries and regions.

### 119 **S.1.6 Carbon Monitor**

120 Refinement of near-real-time daily CO<sub>2</sub> estimates: Building on our previously documented methodology, we  
 121 refine our estimates by establishing a new baseline for emissions and incorporating data from additional countries.  
 122 First, instead of using a single baseline year (2019), the baseline emissions now cover the 2019–2021 period. This  
 123 update mainly relies on the national greenhouse gas inventories (NGHGs) submitted to UNFCCC, with IPCC  
 124 sector emissions systematically mapped to the Carbon Monitor sectors. Second, we update the estimation for the  
 125 power and industry sectors in the Rest of the World (ROW) region. To approximate emission changes in ROW,  
 126 we use the average emission variations observed in countries with available data.

127

## 128 **S.2 Methodology CO<sub>2</sub> emissions from land-use, land-use change and forestry**

### 129 **( $E_{LUC}$ )**

130 The net CO<sub>2</sub> flux from land-use, land-use change and forestry ( $E_{LUC}$ , called land-use change emissions in the  
 131 rest of the text) includes CO<sub>2</sub> fluxes from deforestation, afforestation, logging and forest degradation (including  
 132 harvest activity), shifting cultivation (cycle of cutting forest for agriculture, then abandoning), regrowth of  
 133 forests following wood harvest or abandonment of agriculture, peat burning, and peat drainage. Land-  
 134 management activities are only partly included in our land-use change emissions estimates (Table S1). Some  
 135 land-use change and land-management activities cause emissions of CO<sub>2</sub> to the atmosphere, while others  
 136 remove CO<sub>2</sub> from the atmosphere.  $E_{LUC}$  is the net sum of emissions and removals due to all anthropogenic  
 137 activities considered. Our annual estimates for 1959–2024 are provided as the average of results from three  
 138 bookkeeping models (Supplement S.2.2): the Bookkeeping of Land Use Emissions model (BLUE; Hansis et al.,  
 139 2015), the compact Earth system model OSCAR (Gasser et al., 2020), and the Land-Use Change Emissions  
 140 model (LUCE; Qin et al., 2024). Peat emissions are added from external datasets (Supplement S.2.2). BLUE  
 141 and OSCAR are updated with new land-use forcing data covering the time period until 2024 (Supplement  
 142 S.2.1).  $E_{LUC}$  data are extrapolated to provide a projection for 2025 (Supplement S.2.6). In addition, we use  
 143 results from Dynamic Global Vegetation Models (DGVMs; see Supplement S.2.3 and Table 4) to help quantify  
 144 the uncertainty in  $E_{LUC}$  (Supplement S.2.5), and thus better characterise the robustness of annual estimates and  
 145 trends. In this budget, we follow the  $E_{LUC}$  definition as used by global carbon cycle models, which counts fluxes

146 due to environmental changes on managed land towards  $S_{LAND}$ , as opposed to the national greenhouse gas  
147 inventories (NGHGs) under the UNFCCC, most of which include them in  $E_{LUC}$  and thus often report smaller  
148 land-use emissions (Grassi et al., 2023). Following the methodology of Grassi et al. (2023), we provide  
149 harmonised estimates of the two approaches further below (Supplement S.2.4).

### 150 **S.2.1 Land-Use and Land Use Change Datasets**

151 Bookkeeping models and DGVMs use the harmonised land-use change data LUH2-GCB2025 covering the  
152 period 850-2024 as input to estimate  $E_{LUC}$  (an update to the previously released LUH2 v2h dataset; Hurtt et al.,  
153 2017; Hurtt et al., 2020). LUH2-GCB2025 provides land-use change data at  $0.25^\circ$  spatial resolution based on  
154 data from the Food and Agriculture Organization of the United Nations (FAO, 2025a) as well as the HYDE3.5  
155 dataset (Klein Goldewijk et al., 2017a, 2017b), considering subgrid-scale transitions between primary forest,  
156 secondary forest, primary non-forest, secondary non-forest, cropland, pasture, rangeland, and urban land (Hurtt  
157 et al., 2020; Chini et al., 2021).

158

#### 159 **S.2.1.1 HYDE3.5**

160 The HYDE3.5 cropland/grazing/urban land dataset is constrained by FAO country-level statistics (FAO, 2025a;  
161 bulk download February 2025) for the years 1961-2023. HYDE uses satellite imagery from ESA-CCI from  
162 1992-2018 for more detailed yearly allocation of cropland and grazing land, with the ESA-CCI area data scaled  
163 to match the FAO annual totals at country-level. The 2018 map is also used for the 2019-2024 period. The  
164 original 300 metre spatial resolution data from ESA is aggregated to a 5 arc minute resolution according to the  
165 classification scheme as described in Klein Goldewijk et al. (2017a).

166 As in GCB2024 we replace the FAO timeseries for China, based on province-level area totals from Yu et al.  
167 (2022) for the 1900-2019 period. For Brazil and Indonesia, we replace the full FAO time series with time series  
168 based on MapBiomass state-level area totals (available for 1985-2023 for Brazil and 2000-2023 for Indonesia)  
169 (MapBiomass Brasil, Souza et al., 2020, MapBiomass Indonesia). For Indonesia, MapBiomass replaces cropland  
170 only, which includes oil palm plantations as does FAO, while grazing land is taken from FAO. For the pre-1985  
171 period, the per-capita cropland area in 1985 is calculated for each state of Brazil (based on MapBiomass) and  
172 scaled with the historical population development for each state of Brazil. A similar methodology is adopted for  
173 land cover change information from MapBiomass for Indonesia.

174

#### 175 **S.2.1.2 LUH2-GCB2025**

176 LUH2-GCB2025 is an update of the comprehensive harmonised land-use data set version 2 (Hurtt et al., 2020),  
177 which includes fractional data on primary and secondary forest vegetation, as well as all underlying transitions  
178 between land-use states (Hurtt et al., 2011, 2017, 2020; Chini et al., 2021; Table S1). LUH2-GCB2025 covers  
179 the period 850-2024 and consists of  $0.25^\circ$  fractional areas of land-use states and all transitions between those  
180 states, including an updated wood harvest reconstruction and updated representation of shifting cultivation, crop  
181 rotation, and management information including irrigation and fertiliser application. The land-use states include  
182 five different crop types in addition to splitting grazing land into managed pasture and rangeland. Wood harvest  
183 patterns are constrained with Landsat-based tree cover loss data (Hansen et al. 2013).

184 The complete LUH2-GCB2025 forcing timeseries is updated to use the new HYDE3.5 land-use and population  
185 data. LUH2-GCB2025 uses the 2025 FAO national wood harvest production data for 1961-2023 along with the  
186 new HYDE3.5 population data to reconstruct the historical wood harvest time-series. Wood production data is  
187 linearly extended to the year 2024. In addition, the land-use time series is extended beyond the years that are  
188 directly informed by data in HYDE (e.g., beyond 2023 for those countries based on FAO country-level  
189 statistics) to include land-use states up to and including the year 2025 (and land-use transitions during the year  
190 2024). A simple extension of the previous 5-year trend for each gridcell is applied. Updates in the land-use  
191 forcing are shown in Figure S1 in comparison to LUH2-GCB2023 and LUH2-GCB2024.

192 LUH2-GCB2025 provides a distinction between rangelands and pasture, based on inputs from HYDE.  
193 DGVM/BM groups in the past have requested more information on whether natural vegetation is lost in  
194 conversion to pasture or rangelands. LUH2 guidelines suggest that rangelands are established after clearing of  
195 forests and managed pastures are established after clearing of all other natural vegetation. Therefore, (1)  
196 rangeland establishment in forests is assumed to transform forests to grasslands, (2) rangeland establishment in  
197 non-forest primary vegetation degrades primary to secondary vegetation, and (3) rangeland establishment in  
198 non-forest secondary vegetation has no effect (e.g., browsing on shrubland; Ma et al., 2020). In the bookkeeping  
199 model BLUE, this case distinction is implemented based on a forest mask provided with LUH2-GCB2021.

### 200 ***S.2.2 Bookkeeping models***

201 CO<sub>2</sub> emissions and removals from land-use change are calculated by three bookkeeping models. These are  
202 based on the original bookkeeping approach of Houghton (2003), which keeps track of the carbon stored in  
203 vegetation and soils before and after a land-use change event (transitions between various natural vegetation  
204 types, croplands, and pastures). Literature-based response curves describe the decay of vegetation and soil  
205 carbon, including carbon transfer to product pools of different lifetimes, as well as carbon uptake due to  
206 regrowth. In addition, the bookkeeping models represent long-term degradation of primary forest as lowered  
207 standing vegetation and soil carbon stocks in secondary forests and include forest management practices such as  
208 wood harvests.

209 All three GCB2025 bookkeeping models use transient carbon densities to estimate  $E_{LUC}$ , i.e., they consider the  
210 effects of environmental changes, such as atmospheric CO<sub>2</sub> increase and impacts of climate change, on  
211 vegetation and soil carbon densities. In the past, only the OSCAR estimates were based on transient carbon  
212 densities while the other bookkeeping models followed the original bookkeeping approach and used static  
213 carbon densities. The consideration of environmental changes to estimate  $E_{LUC}$  does not interfere with  $S_{LAND}$   
214 estimates. In fact, considering environmental effects for  $E_{LUC}$  estimates and correcting  $S_{LAND}$  for the bias from  
215 Replaced Sinks and Sources (RSS; see Section S.4.1) delivers a conceptually consistent terrestrial carbon budget  
216 (Pongratz et al. 2014; Dorgeist et al., 2024) correcting for biases present in previous GCB assessments. OSCAR  
217 already includes the transient response in its  $E_{LUC}$  estimates (Gasser and Ciais, 2013; Gasser et al., 2020). The  
218 static carbon densities of BLUE and LUCE were both updated using time-varying data from DGVM following  
219 the method described in Dorgeist et al. (2024). Vegetation and soil carbon densities were used to derive scaling  
220 factors, benchmarked to their 1980 values. These scaling factors are applied to the original carbon densities of  
221 BLUE and LUCE. The updated carbon densities maintain the original spatial resolution but with temporal

222 changes following DGVMs. While this approach does not resolve interannual variability in environmental  
223 conditions - e.g., natural fires, droughts, or windthrow are not reflected in carbon densities in the year they occur  
224 - the carbon densities represent the average cycle of natural disturbances, as they are based on direct  
225 observations or literature. As the transient dynamics of the carbon densities are derived from DGVMs, also  
226 changes in disturbance regimes are accounted for, to the extent captured by the DGVMs.

227 The bookkeeping models differ in (1) computational units (spatially explicit treatment of land-use change at  
228 0.25° resolution for BLUE and LUCE, country-level for OSCAR), (2) processes represented (see Table S1), and  
229 (3) carbon densities assigned to vegetation and soils for different types of vegetation (literature-based for BLUE,  
230 calibrated to DGVMs for OSCAR, mainly literature-based but additionally considering the impact of land  
231 cohort age on secondary land carbon stocks for LUCE). All three bookkeeping models include subgrid-scale  
232 transitions between all vegetation types, and they allocate pasture transitions proportionally to all natural  
233 vegetation that exists in a grid cell.

234 The three bookkeeping estimates used in this study differ with respect to the land-use change data used to drive  
235 the models. BLUE and LUCE use the harmonised land-use change data LUH2-GCB2025. OSCAR was run with  
236 both LUH2-GCB2025 and data from the Forest Resource Assessment (FRA) of FAO (using data from FAO,  
237 2020), which provides statistics on forest-area change and management at intervals of five years. The data is  
238 based on country reporting to FAO and may include remote-sensing information in more recent assessments.  
239 Changes in land use other than forests are based on annual, national changes in cropland and pasture areas  
240 reported by FAO (FAO, 2021). FAO/FRA data were linearly extrapolated to 2024 using their 2015-2020 trends.  
241 The best-guess OSCAR estimate used in our study is a combination of results for LUH2-GCB2025 and  
242 FAO/FRA land-use data and a large number of perturbed parameter simulations weighted against a constraint  
243 (the cumulative  $S_{\text{LAND}}$  over 1960-2023 of last year's GCB).

244 Bookkeeping models do not directly capture carbon emissions from the organic layers of drained peat soils nor  
245 from peat fires. Particularly the latter can create large emissions and interannual variability due to synergies of  
246 land-use and climate variability in equatorial Southeast Asia, especially during El-Niño events. We add peat fire  
247 emissions based on the Global Fire Emission Database (GFED4s; van der Werf et al., 2017) to the bookkeeping  
248 models' output. Peat fire emissions are calculated by multiplying the mass of dry matter emitted by peat fires  
249 with the carbon emission factor for peat fires indicated in the GFED4s database. Emissions from deforestation  
250 and degradation fires used to derive the 2025  $E_{\text{LUC}}$  projection (Supplement S.2.6) are calculated analogously.  
251 The satellite-derived GFED4s estimates of peat fire emissions start in 1997. For the previous years, we follow  
252 the approach by Houghton and Nassikas (2017), which linearly ramps up from zero emissions in 1980 to 0.04  
253  $\text{GtC yr}^{-1}$  in 1996, reflecting the onset of major clearing of peatlands in equatorial Southeast Asia in the 1980s.

254 We also add peat drainage emissions, combining estimates from three spatially explicit datasets. We employ  
255 peat drainage emissions 1990–2022 from croplands and grasslands provided by FAO (Conchedda and Tubiello,  
256 2020; FAO, 2025b), peat drainage emissions 1700–2010 from simulations with the DGVM ORCHIDEE-PEAT  
257 (Qiu et al., 2021), and peat drainage emissions 1701–2024 from simulations with the DGVM LPX-Bern v1.5  
258 (Lienert and Joos, 2018; Müller and Joos, 2021), the latter applying the updated LUH2-GCB2025 forcing as  
259 also used by BLUE, OSCAR, LUCE, and the DGVMs. The LPX-Bern simulations start from a transient run  
260 over the last deglaciation (-20,050 to 1700 AD) following Müller and Joos (2020) and are forced by changes in

261 climate, atmospheric CO<sub>2</sub>, nitrogen deposition/input, and land-use changes. Simulations were done with and  
262 without prescribing land-use changes since 1700 AD. The difference between the simulations represents  
263 anthropogenic peat drainage emissions. To account for internal variability, we used the median peat drainage  
264 emissions from a 10-member ensemble. In LPX-Bern, peat carbon is stored in (i) active peatlands, (ii) former  
265 peatlands (“natural”), and (iii) former peatlands under anthropogenic use. We average the two CO<sub>2</sub> emission  
266 cases from Müller and Joos (2021), assuming that half the peat carbon is lost immediately to the atmosphere  
267 after transformation from active to former peatland, while the rest decays slowly, depending on local  
268 temperature and soil moisture. The LPX-Bern peat drainage emissions show a very high emission peak in  
269 Russia in 1959 followed by very low emissions in 1960. This peak can be attributed to an artefact in the HYDE  
270 dataset, which was corrected for Brazil and the Democratic Republic of the Congo in GCB2022 (Friedlingstein  
271 et al. 2022b) but remains for Russia where it strongly impacts the LPX-Bern peat drainage estimates in 1959 and  
272 1960. To correct for this unrealistic peak, we replace the LPX-Bern peat drainage emissions in Russia in 1959  
273 and 1960 by the average of the estimates in 1958 and 1961. The FAO peat drainage emissions are extrapolated  
274 to 1850-2024 by keeping the post-2022 emissions constant at 2022 levels, by linearly increasing tropical peat  
275 drainage emissions between 1980 and 1990 starting from 0 GtC yr<sup>-1</sup> in 1980 (consistent with Houghton and  
276 Nassikas, 2017), and by keeping pre-1990 emissions from the often old, drained areas of the extra-tropics  
277 constant at 1990 emission levels. The ORCHIDEE-PEAT data are extrapolated to 2011-2024 by replicating the  
278 average emissions in 2000-2010 (pers. comm. C. Qiu). Further, ORCHIDEE-PEAT only provides peat drainage  
279 emissions north of 30°N, and thus we fill the regions south of 30°N by the average peat drainage emissions from  
280 FAO and LPX-Bern. The final peat drainage emissions are calculated as the average of the estimates from the  
281 three different peat drainage datasets.

282 We provide a split of net ELUC into component fluxes to give more insight into the drivers of net ELUC and to  
283 better identify reasons for divergence between bookkeeping estimates. This split distinguishes between  
284 emissions from deforestation (including due to shifting cultivation), removals from forest (re-)growth (including  
285 regrowth in shifting cultivation cycles), fluxes from wood harvest and other forest management (including  
286 emissions from slash decay in forests, emissions from product decay following wood harvesting, and removals  
287 from regrowth after wood harvesting), emissions from peat drainage and peat fires, and emissions and removals  
288 associated with all other land-use transitions. Additionally, we split deforestation emissions into emissions from  
289 permanent deforestation and emissions from deforestation in shifting cultivation cycles. Similarly, we split  
290 removals from forest (re-)growth into forest (re-)growth due to re-/afforestation and forest regrowth in shifting  
291 cultivation cycles. This distinction is insightful with regard to the levers on the reduction of net emissions: as  
292 deforestation for shifting cultivation is only temporary, the associated CO<sub>2</sub> emissions cannot easily be avoided  
293 without compromising the CO<sub>2</sub> removals from regrowth in shifting cultivation cycles. By contrast, permanent  
294 deforestation is typically not directly related to re-/afforestation. Stopping deforestation for permanent  
295 agricultural expansion and increasing the forest area provide two independent levers for net emissions reduction.  
296 ELUC data are provided as global sums, as spatially explicit estimates at 0.25° spatial resolution (i.e., the native  
297 LUH2-GCB2025 resolution), and for 199 countries (based on the list of UNFCCC parties). Spatially explicit  
298 ELUC estimates for BLUE and LUCE are directly available at 0.25°. For OSCAR, the country-level estimates  
299 were scaled to 0.25° based on the patterns of gross emissions and gross removals in BLUE (following the  
300 methodology of Schwingshackl et al., 2022). The global net ELUC values indicated in the manuscript are the sum

301 of  $E_{LUC}$  estimates from bookkeeping models, peat drainage emissions (average of FAO, LPX-Bern, and  
302 ORCHIDEE-PEAT), and peat fire emissions (from GFED4s). Annual  $E_{LUC}$  estimates from 1850 onwards are  
303 calculated as the average of the estimates from BLUE, OSCAR, and LUCE plus emissions from peat fires and  
304 peat drainage. For the cumulative numbers starting in 1750, emission estimates between 1750-1850 are added  
305 based on the average of four earlier publications ( $30 \pm 20$  GtC 1750-1850, rounded to nearest 5; Le Quéré et al.,  
306 2016). The gridded net  $E_{LUC}$  estimates of BLUE, LUCE, and OSCAR are averaged, and the gridded estimates of  
307 peat drainage emissions and of peat fire emissions are added. Country-level estimates for the gridded datasets  
308 (BLUE, LUCE, LPX-Bern, ORCHIDEE-PEAT, GFED4s) are calculated based on a country map from Eurostat  
309 (Eurostat, 2024), which was remapped to  $0.25^\circ$ . In case multiple countries are present in a  $0.25^\circ$  grid cell, the  
310  $E_{LUC}$  estimates are allocated proportional to each country's land fraction in that grid cell.

### 311 ***S.2.3 Dynamic Global Vegetation Models (DGVMs)***

312 All DGVMs represent processes of vegetation growth and mortality, as well as decomposition of dead organic  
313 matter associated with natural cycles, and include the vegetation and soil carbon response to increasing  
314 atmospheric  $CO_2$  concentration, to climate variability and to climate change. Most models explicitly simulate  
315 the coupling of carbon and nitrogen cycles and account for atmospheric N deposition and N fertilisers (Table  
316 S1). The DGVMs are independent from the other budget terms except for their use of atmospheric  $CO_2$   
317 concentration to calculate the fertilisation effect of  $CO_2$  on plant photosynthesis. Land-use change  $CO_2$   
318 emissions are also estimated by an ensemble of 22 DGVMs. The DGVMs account for deforestation and  
319 regrowth, the most important components of  $E_{LUC}$ , but they do not represent all processes resulting directly from  
320 human activities on land (Table S1).

321 All DGVMs use the LUH2-GCB2025 dataset as input to estimate the land use change  $CO_2$  fluxes, which  
322 includes the HYDE cropland/grazing land dataset (Klein Goldewijk et al., 2017a, 2017b), and some additional  
323 information on land-use transitions, land-use management activities and wood harvest. DGVMs that do not  
324 simulate subgrid-scale transitions (i.e., those estimating net land-use emissions; see Table S1) use the HYDE  
325 information on agricultural area change. DGVMs implement land-use change in different ways (e.g., an  
326 increased cropland fraction in a grid cell can either be at the expense of grassland, shrubs, or forest, the latter  
327 resulting in deforestation; land cover fractions of non-agricultural land differ between models). Similarly,  
328 model-specific assumptions are applied to convert deforested biomass or deforested area, and other forest  
329 product pools into carbon, and different choices are made regarding the allocation of rangelands as natural  
330 vegetation or pastures.

331 As a criterion for inclusion in this carbon budget, we only retain models that simulate a positive  $E_{LUC}$  during the  
332 1990s, as assessed in the IPCC AR4 (Denman et al., 2007) and AR5 (Ciais et al., 2013). All DGVMs met this  
333 criterion.

### 334 ***S.2.4 Translation between NGHGs and $E_{LUC}$***

335 Land-use emissions estimates from bookkeeping models and from national GHG Inventories (NGHGs) show a  
336 large gap (Figure 8 and Table S11). This gap is due to different approaches for calculating anthropogenic  $CO_2$   
337 fluxes related to land-use change and land management (Grassi et al. 2018). Land sinks due to environmental

338 changes on managed lands are treated as non-anthropogenic in the GCB assessments, while they are generally  
339 considered as anthropogenic in NGHGIs (“indirect anthropogenic fluxes”; IPCC, 2006). Building on previous  
340 studies (Grassi et al. 2021), we implement a translation approach that adds the DGVM estimates of CO<sub>2</sub> fluxes  
341 due to environmental change in managed forest areas (part of S<sub>LAND</sub>) to the E<sub>LUC</sub> estimate from bookkeeping  
342 models. The translated E<sub>LUC</sub> values are expected to be conceptually more comparable to NGHGI estimates.

343 LULUCF data from NGHGIs are those in the LULUCF data hub V3.1 (<https://zenodo.org/records/17153438>).  
344 They are collected and processed based on country data submitted to the UNFCCC, as described in detail by  
345 Melo et al. (2025). While Annex I countries report a complete time series 1990-2023, gap-filling was applied for  
346 many Non-Annex I countries through linear interpolation between two points and/or through extrapolation  
347 backward (till 2000) and forward (till 2023) using the single closest available data. For this assessment, the  
348 NGHGI estimates of the year 2024 are assumed to be equal to those of 2023. NGHGI data include all CO<sub>2</sub>  
349 fluxes from land considered managed (forest land, cropland, grassland, wetlands, settlements, and other land),  
350 changes among these land categories, and emissions from organic soils (i.e., from peat drainage), from  
351 harvested wood products and from fires. Almost all Annex I countries report all land uses, whereas many non-  
352 Annex I countries report only on deforestation and forest land, and only few countries report on other land uses.  
353 Similarly, Annex I countries typically report most carbon pools (biomass, dead organic matter, soil), whereas  
354 non-biomass pools are reported less frequently by non-Annex I countries.

355 In most cases, NGHGIs include most of the natural response to recent environmental changes because they use  
356 direct observations (e.g., national forest inventories) that do not allow separating direct and indirect  
357 anthropogenic effects (IPCC, 2006; Grassi et al., 2018). These effects are considered to be particularly relevant  
358 in forests (Grassi et al., 2023). To improve comparability with NGHGIs, the natural land sink (S<sub>LAND</sub>) in  
359 managed forests (only including carbon fluxes due to environmental change and excluding land-use change  
360 fluxes) is added to the results from bookkeeping models to make them comparable to LULUCF estimates from  
361 NGHGIs (Figure 8).

362 To determine S<sub>LAND</sub> in managed forests, the following steps were taken (Grassi et al., 2023): Spatially gridded  
363 data of natural forest NBP were obtained from DGVMs using the S2 simulation from the TRENDY-GCB2025  
364 dataset (see Supplement S.4.1). For those DGVMs that disaggregate their NBP results by plant functional type  
365 (PFT), NBP from forest PFTs was used. For all other DGVMs, the total NBP of a grid cell was used for all grid  
366 cells containing forest. Since S2 simulations use pre-industrial forest cover masks that are at least 20% larger  
367 than today’s forest (Hurtt et al. 2020), we corrected this NBP by a ratio between observed forest cover (based on  
368 Hansen et al. 2013) and prescribed forest cover (from DGVMs). Results were then masked using a proxy map of  
369 managed forest (Rossi et al., 2024) for different years (2000, 2010, and 2020). This map is based on global  
370 Earth observation-derived data of tree cover (Hansen et al. 2013) and country-based information on managed  
371 and unmanaged forests. Several countries indicate that all forest is managed (e.g., China, India, Australia, most  
372 European countries) and a few provide geospatial polygons of managed forest areas (Brazil, Canada, USA).  
373 However, some countries report only the total extent of managed and unmanaged forest without maps being  
374 available (e.g., Russia) or do not provide specific information on managed land (most developing countries). In  
375 these cases, maps of intact and non-intact forest areas (Potapov et al. 2017) were used as a proxy of non-

376 managed and managed forests in NGHGs, respectively (Grassi et al. 2023). The detailed DGVM processing  
377 steps are explained in Alkama (2022).

378 We also use gridded net land flux estimates from 14 atmospheric inversion systems (Table S4) to get an  
379 additional estimate of land-use fluxes on managed land. We applied a correction for riverine transport (see  
380 Supplement S.5.1.) and multiplied the resulting values with the fraction of managed land in each grid cell for  
381 each inversion system. For this purpose, we used masks of managed land from Grassi et al. (2023) available for  
382 the years 1994, 2002, 2010, and 2016. We linearly interpolated the masks in time and replicated the 2016 mask  
383 in the years 2017-2024. Subsequently, we applied another correction for lateral transport due to international  
384 wood and crop trade (data from Deng et al. 2024). The obtained values are summed globally and compared to  
385 the NGHGI estimates and the translated net  $E_{LUC}$  estimates.

386 Figure 8 and Table S11 show the resulting translation of global carbon cycle models' land flux definitions to that  
387 of the NGHGs (discussed in Section 3.2.2). For comparison we also show LULUCF estimates from the  
388 FAOSTAT database (FAO, 2025c), which include emissions from net forest conversion and fluxes on forest  
389 land (Tubiello et al., 2025) as well as CO<sub>2</sub> emissions from peat drainage (Conchedda and Tubiello, 2020) and  
390 peat fires (Prosperi et al., 2020). The forest land stock change estimates use as input the most recent FRA 2025  
391 data. The FAOSTAT data shows small net removals of -0.01 GtC yr<sup>-1</sup> averaged over 2015-2024, in contrast to  
392 the removals of -1.05 GtC yr<sup>-1</sup> estimated by the gap-filled NGHGI data (Table S11). The difference between  
393 these two estimates reflects different scopes, methods, and input data. The NGHGI focus lies on estimating  
394 carbon fluxes from land use, land-use change, and forestry using either a gain-loss or stock-difference approach  
395 (depending on the country) as defined by IPCC guidelines. The FAOSTAT estimate generally includes CO<sub>2</sub>  
396 fluxes in all forests (managed and unmanaged; depending on the country) using a stock-difference approach  
397 based on FAO's Forest Resource Assessment whose focus is on area and biomass stocks, and emissions for  
398 drainage and fires in organic soils. In particular, the NGHGI data include a larger forest sink for non-Annex 1  
399 countries resulting from a more complete coverage of non-biomass carbon pools and non-forest land uses  
400 (Grassi et al., 2022; Tubiello et al., 2025).

### 401 ***5.2.5 Uncertainty assessment for $E_{LUC}$***

402 Differences between the bookkeeping models and DGVMs originate from three main sources: different  
403 methodologies, different underlying land-use/land-cover datasets, and different processes represented (Table  
404 S1). We examine both the results from bookkeeping models and from DGVMs and use the resulting variations  
405 to characterise the uncertainty in  $E_{LUC}$ .

406 Despite the existing differences, the  $E_{LUC}$  estimate from the DGVM multi-model mean is consistent with the  
407 average of the emissions from the bookkeeping models (Table 5). However, there are large differences among  
408 individual DGVMs (standard deviation at ~0.5 GtC yr<sup>-1</sup>; Table 5) and between the bookkeeping estimates  
409 (standard deviation at 0.3 GtC yr<sup>-1</sup> for cumulative emissions in 1850-2024). A factorial analysis of differences  
410 between BLUE and the bookkeeping model H&N2017 (Houghton & Nassikas, 2017), which was part of the  
411 bookkeeping ensemble in previous GCBs, attributed them particularly to differences in carbon densities between  
412 primary and secondary vegetation (Bastos et al., 2021). Earlier studies additionally showed the relevance of the  
413 different land-use forcing as applied (in updated versions) also in the current study (Gasser et al., 2020).

414 Ganzenmüller et al. (2022) showed that  $E_{LUC}$  estimates from BLUE are substantially smaller when the model is  
415 driven by a high-resolution land-use dataset (HILDA+). They identified shifting cultivation and the way it is  
416 implemented in LUH2 as a main reason for this divergence. They further showed that a higher spatial resolution  
417 reduces the estimates of both gross emissions and gross removals because successive transitions are not  
418 adequately represented at coarser resolution, which has the effect that—despite capturing the same extent of  
419 transition areas—overall less area remains pristine at the coarser compared to the higher resolution.

420 The uncertainty in  $E_{LUC}$  of  $\pm 0.7 \text{ GtC yr}^{-1}$  reflects our best value judgement that there is at least 68% chance  
421 ( $\pm 1\sigma$ ) that the true land-use change emissions lie within the given range, for the range of processes considered  
422 here. Prior to the year 1959, the uncertainty in  $E_{LUC}$  is taken from the standard deviation of the DGVMs. We  
423 assign low confidence to the annual estimates of  $E_{LUC}$  because of the inconsistencies among estimates and  
424 because of the difficulties to quantify some of the processes with DGVMs.

### 425 ***S.2.6 Land-use emissions projection for 2025***

426 We project the 2025 land-use emissions based on anomalies in emissions from peat fires and tropical  
427 deforestation and degradation fires from GFED4s. The GFED4s estimates for 2025 are as of October 15, 2025.  
428 Since the  $E_{LUC}$  estimate for the year 2024 is informed by extrapolated land-use data (Section 3.2.3, Supplement  
429 S.2.1), we estimate the 2025 projection based on fire anomalies in 2025 relative to the year 2023. Peat drainage  
430 emissions are assumed to be unaltered, as they have low interannual variability.

431

## 432 **S.3 Methodology Ocean $\text{CO}_2$ sink $S_{OCEAN}$**

### 433 ***S.3.1 Observation-based estimates***

434 ***fCO<sub>2</sub>-products*** - We use nine estimates of the ocean  $\text{CO}_2$  sink and its variability based on surface ocean  $f\text{CO}_2$   
435 maps obtained by the interpolation of surface ocean  $f\text{CO}_2$  measurements. Seven of the methods cover a period  
436 from 1990 onwards due to severe restriction in data availability prior to 1990 (Figure 11), whereas two span the  
437 period from 1957 and 1959 onwards. These estimates differ in many respects: they use different maps of surface  
438  $f\text{CO}_2$ , different atmospheric  $\text{CO}_2$  concentrations, different wind products and different gas-exchange  
439 formulations as specified in Table S3. We refer to them as  $f\text{CO}_2$ -products. The methods include a data-driven  
440 diagnostic method combined with a multi-linear regression approach to extend back to 1957 (Rödenbeck et al.,  
441 2022; referred to here as Jena-MLS), five neural network models (Landschützer et al., 2014; referred to as  
442 VLIZ-SOMFFN; Chau et al., 2022; Copernicus Marine Environment Monitoring Service, referred to here as  
443 CMEMS-LSCE-FFNN; Zeng et al., 2022; referred to as NIES-ML3; Gregor et al., 2019, referred to as CSIR-  
444 ML6, Ford et al., 2024; referred to as UExp-FNN-U), one cluster regression approach (Gregor et al., 2024;  
445 referred to as OceanSODA-ETHZv2), a multi-linear regression method (Iida et al., 2021; referred to as JMA-  
446 MLR), and one method that relates the  $f\text{CO}_2$  misfit between GOBMs and SOCAT to environmental predictors  
447 using the extreme gradient boosting method extending back to 1959 (Gloege et al., 2022). The ensemble mean  
448 of the  $f\text{CO}_2$ -based flux estimates is calculated from these nine mapping methods. In v2025, we now also include  
449 2  $f\text{CO}_2$  products (JMA-MLR and UExp-FNN-U) where the authors adjusted the SOCAT  $f\text{CO}_2$  to account for  
450 differences in temperature between the depth of the ship intake and the relevant depth right near the surface

451 using the dataset provided by Ford et al. (2025). Furthermore, UExp-FNN-U includes an additional adjustment  
452 to account for the cool surface skin temperature effect in the air-sea CO<sub>2</sub> flux.

453 Following the approach of Friedlingstein et al. (2025b), we add 0.18 PgC yr<sup>-1</sup> (multiplied by 7/9 as 2 products  
454 already include the cool skin/warm layer temperature effect). This correction is only done on the *f*CO<sub>2</sub>-products  
455 average, at the global scale, for the estimate of SO<sub>CEAN</sub>.

456

457 The impact of the cool skin and warm layer effect on air-sea CO<sub>2</sub> flux is based on established understanding of  
458 temperature gradients (as discussed by Goddijn-Murphy et al., 2015 and Woolf et al., 2016), and laboratory  
459 observations (Jähne and Haussecker, 1998; Jähne, 2019), however in situ field observational evidence is still  
460 sparse (Dong et al., 2022, Ford et al., 2024a). While the cool skin and warm ocean layers are mechanistically  
461 well understood, temperature differences between the ship inlet and the sea surface microlayer due to variable  
462 sampling depth as well as potential artificial warm biases also have been suggested in the literature (Dong et al.,  
463 2022, Watson et al., 2020). These are, however, not considered in the above correction factor due to their  
464 uncertainty.

465

466 Typically, *f*CO<sub>2</sub>-products do not cover the entire ocean due to missing coastal oceans and sea-ice cover. The  
467 CO<sub>2</sub> flux from the *f*CO<sub>2</sub>-based products is already at or above 99% coverage of the ice-free ocean surface area in  
468 several products this year (UExp-FNN-U, JMA-MLR, VLIZ-SOMFFN, Jena-MLS, OceanSODA-ETHZv2, either  
469 due to complete coverage or a posteriori filling). The products that remained below 99% coverage of the ice-free  
470 ocean (CMEMS-LSCE-FFNN, NIES-ML3, LDEO-HPD, CSIR-ML6 ) were scaled by the following procedure.  
471 Since v2022 of the GCB we now scale fluxes globally and regionally (North, Tropics, South) to match the ice-  
472 free area (using the HadISST sea surface temperature and sea ice cover; Rayner et al., 2003):

$$473 \quad FCO_2^{reg-scaled} = \frac{A_{(1-ice)}^{region}}{A_{FCO_2}^{region}} \cdot FCO_2^{region} \quad (S4)$$

474 In Eq. (S4), *A* represents area, (1 – ice) represents the ice-free ocean, *A*<sub>FCO<sub>2</sub><sup>region</sup> represents the coverage of the  
475 *f*CO<sub>2</sub>-product for a region, and *F*CO<sub>2</sub><sup>region</sup> is the integrated flux for a region.</sub>

476

477 **SOCAT** - The measurements underlying the surface *f*CO<sub>2</sub>-products are from the Surface Ocean CO<sub>2</sub> Atlas  
478 version 2025 (SOCAT v2025; Bakker et al., 2025), which is an update of version 3 (Bakker et al., 2016) and the  
479 subsequent annual updates used in previous versions of the global carbon budget. SOCAT has updated its  
480 quality control cookbook for SOCATv2025 (Gkritzalis et al., 2024), partly in response to the results of the 2021  
481 *f*CO<sub>2</sub> intercomparison experiment (Steinhoff et al., 2025). These changes have been implemented going  
482 forwards, i.e. for new and updated data submissions to SOCATv2025. Two important changes in the cookbook  
483 are: Membrane-based *f*CO<sub>2</sub> sensor data can at best receive a flag of E (uncertainty of less than 10 μatm), such  
484 that new and updated membrane-based data sets are not part of the synthesis and gridded SOCAT products used  
485 for the global carbon budget. Complete metadata is now required for all new and updated data sets (except for  
486 historic data sets).

487

488 SOCAT v2025 has an additional 2.8 million *f*CO<sub>2</sub> measurements with an estimated accuracy of better than 5  
489 μatm relative to v2024. Of these, 2 million are from 2024 in a total of 283 data sets (Table S8), while the largest

490 addition from earlier years is from 2023 with 136 data sets new to SOCAT. Nineteen shipboard data sets that  
491 were included in earlier SOCAT versions have been suspended or excluded from SOCATv2025 (Table S13).  
492 This includes: two coastal data sets with warming in excess of 10°C, eight data sets in the Arctic Ocean where  
493 the sea surface temperature and the equilibrator temperature had been swapped and where some data sets  
494 overlapped with other data sets, four data sets in the Atlantic Ocean awaiting updates by the data provider and  
495 five data sets in the Southern Ocean with a 2-hour offset between the temperature sensors. All these data sets  
496 had passed quality control before inclusion in an earlier SOCAT version. This highlights that some data quality  
497 issues are missed during quality control by the data provider and during SOCAT quality control. Inclusion of  
498 problematic data sets can affect estimates of ocean CO<sub>2</sub> uptake from data-based mapping products, especially in  
499 data sparse regions, such as the polar oceans (Fay et al., 2025). SOCAT will consider introducing additional  
500 automated quality control checks relating to excessive warming or cooling of seawater between sampling and  
501 analysis, as well as to spikes in these temperature changes.

502

503 For 2023, the one but final year in SOCATv2025 (with more data sets than the final year as a result of delays in  
504 data submission), there are a total of 269 data sets with measurements in the Northern hemisphere, while there  
505 are 107 data sets from the Southern hemisphere. For the Southern Ocean, there are only 33 data sets from 2023  
506 south of 50°S, and only four from Austral winter (June-August). The coverage of SOCAT observations in 2023  
507 is only about 75% of that in 2016 (Fig. 11), mainly as a result of a large reduction in sampling in the Northern  
508 hemisphere (from 391 to 269 data sets), while the Southern hemisphere data collection effort showed little  
509 change (from 109 to 107 data sets). Each of the data-based estimates uses a different method to map the SOCAT  
510 v2025 data to the global ocean.

511

512 **Prior to 1959** - We further use results from two diagnostic ocean models, Khatiwala et al. (2013) and DeVries  
513 (2014), to estimate the anthropogenic carbon accumulated in the ocean prior to 1959. The two approaches  
514 assume constant ocean circulation and biological fluxes, with  $S_{\text{OCEAN}}$  estimated as a response in the change in  
515 atmospheric CO<sub>2</sub> concentration calibrated to observations. The uncertainty in cumulative uptake of  $\pm 20$  GtC  
516 (converted to  $\pm 1\sigma$ ) is taken directly from the IPCC's review of the literature (Rhein et al., 2013), or about  $\pm 30\%$   
517 for the annual values (Khatiwala et al., 2009).

518

519 **Additional data** - We use the observational constraints assessed by IPCC of a mean ocean CO<sub>2</sub> sink of  $2.2 \pm 0.7$   
520 GtC yr<sup>-1</sup> for the 1990s (90% confidence interval; Ciais et al., 2013) to verify that the GOBMs and  $f\text{CO}_2$ -products  
521 provide a realistic assessment of  $S_{\text{OCEAN}}$ . This is based on indirect observations with seven different  
522 methodologies and their uncertainties, and further using three of these methods that are deemed most reliable for  
523 the assessment of this quantity (Denman et al., 2007; Ciais et al., 2013). The observation-based estimates use the  
524 ocean/land CO<sub>2</sub> sink partitioning from observed atmospheric CO<sub>2</sub> and O<sub>2</sub>/N<sub>2</sub> concentration trends (Manning and  
525 Keeling, 2006; Keeling and Manning, 2014), an oceanic inversion method constrained by ocean  
526 biogeochemistry data (Mikaloff Fletcher et al., 2006), and a method based on penetration time scale for  
527 chlorofluorocarbons (McNeil et al., 2003). The IPCC estimate of 2.2 GtC yr<sup>-1</sup> for the 1990s is consistent with a  
528 range of methods (Wanninkhof et al., 2013). We refrain from using the IPCC estimates for the 2000s ( $2.3 \pm 0.7$   
529 GtC yr<sup>-1</sup>), and the period 2002-2011 ( $2.4 \pm 0.7$  GtC yr<sup>-1</sup>, Ciais et al., 2013) as these are based on trends derived

530 mainly from models and one data-product (Ciais et al., 2013). Additional constraints summarised in AR6  
531 (Canadell et al., 2021) are the interior ocean anthropogenic carbon change (Gruber et al., 2019) and ocean sink  
532 estimate from atmospheric CO<sub>2</sub> and O<sub>2</sub>/N<sub>2</sub> (Tohjima et al., 2019), of which we already use updated data sets for  
533 model evaluation and discussion, respectively.

### 534 ***S.3.2 Global Ocean Biogeochemistry Models (GOBMs)***

535 The ocean CO<sub>2</sub> sink for 1959-2024 is estimated using ten GOBMs (Table S2). The GOBMs represent the  
536 physical, chemical, and biological processes that influence the surface ocean concentration of CO<sub>2</sub> and thus the  
537 air-sea CO<sub>2</sub> flux. The GOBMs are forced by meteorological reanalysis and atmospheric CO<sub>2</sub> concentration data  
538 available for the entire time period. They mostly differ in the source of the atmospheric forcing data  
539 (meteorological reanalysis), spin up strategies, and in their horizontal and vertical resolutions (Table S2). All  
540 GOBMs except one (CESM-ETHZ) do not include the effects of anthropogenic changes in nutrient supply  
541 (Duce et al., 2008). They also do not include the perturbation associated with changes in riverine organic carbon  
542 (see Section 2.10 and Supplement S.6.3). Four sets of simulations were performed with each of the GOBMs.  
543 Simulation A applied historical changes in climate and atmospheric CO<sub>2</sub> concentration. Simulation B is a  
544 control simulation with constant atmospheric forcing (normal year or repeated year forcing) and constant pre-  
545 industrial atmospheric CO<sub>2</sub> concentration. Simulation C is forced with historical changes in atmospheric CO<sub>2</sub>  
546 concentration, but repeated year or normal year atmospheric climate forcing. Simulation D is forced by  
547 historical changes in climate and constant pre-industrial atmospheric CO<sub>2</sub> concentration.

548  
549 To derive  $SO_{CEAN}$  from the model simulations, we subtracted the slope of a linear fit to the annual time series of  
550 the control simulation B from the annual time series of simulation A. Assuming that drift and bias are the same  
551 in simulations A and B, we thereby correct for any model drift. Further, this difference also removes the natural  
552 steady state flux (assumed to be 0 GtC yr<sup>-1</sup> globally without rivers), which is often a major source of biases.  
553 Note, however, that Gürses et al. (2023) questioned the assumption of comparable bias and drift in simulations  
554 A and B as they compared two versions of FESOM-REcoM, and found a very similar air-sea CO<sub>2</sub> flux in  
555 simulation A despite a different bias as derived from simulation B. This approach works for all model set-ups,  
556 including IPSL and Princeton, where simulation B was forced with variable historical climate changes (looping  
557 over a certain repeated period for atmospheric forcing). This approach assures that the interannual variability is  
558 not removed from IPSL and Princeton simulation A. The absolute correction for bias and drift per model in the  
559 1990s varied between <0.01 GtC yr<sup>-1</sup> and 0.41 GtC yr<sup>-1</sup>, with one model having a positive bias, six having  
560 negative biases and three model having essentially no biases (NorESM, ACCESS, CESM-ETHZ,  $\leq 0.02$  GtC  
561 yr<sup>-1</sup>). The MPI, IPSL and Princeton models use riverine input and therefore simulate outgassing in simulation B.  
562 By subtracting a linear fit of simulation B, also the ocean carbon sink of these models follows the definition of  
563  $SO_{CEAN}$ . This correction increases the model mean ocean carbon sink by 0.12 GtC yr<sup>-1</sup> in the 1990s.  
564 The ocean models cover 99% to 101% of the total ocean area, so that area-scaling is not necessary.  
565 Finally, as proposed in Friedlingstein et al. (2025b) we upscale the multi model average estimate of the ocean  
566 sink by 10% to account for the known underestimation of the sink by the GOBMs (section 2.5 and  
567 Friedlingstein et al., 2025b). This is justified by the GOBM average underestimating anthropogenic carbon  
568 accumulation by 10% in the period 1994 to 2007 (section 3.6.5), in the 1990s and 2000s (Table 6) and by 15%

569 in the 2010s (Table 6). Also the fact that most models simulate a low AMOC and a high Revelle factor  
570 (compared to GLODAP, Table S11) supports a higher ocean carbon sink although the emergent constraint  
571 framework (Terhaar et al., 2022) does not yield significant results for the GOBMs (Terhaar et al., 2024).  
572 This correction is only done on the GOBMs average, at the global scale, for the estimate of  $SO_{CEAN}$ .

### 573 **S.3.3 GOBM evaluation**

574 The ocean  $CO_2$  sink for all GOBMs and the ensemble mean falls within 90% confidence of the observed range,  
575 or 1.5 to 2.9  $GtC\ yr^{-1}$  for the 1990s (Ciais et al., 2013) before and after applying adjustments.

576  
577 In addition to the interior ocean anthropogenic carbon accumulation (Section 3.6.5), we evaluate the models  
578 with process-based metrics that were previously related to ocean carbon uptake (Table S12). These are the  
579 Atlantic Meridional Overturning Circulation (Goris et al., 2018, Terhaar et al., 2022, 2024), the Southern Ocean  
580 sea surface salinity (Terhaar et al., 2021, 2022, 2024, Hauck et al., 2023b), the Southern Ocean stratification  
581 index (Bourgeois et al., 2022) and the surface ocean Revelle factor (Terhaar et al., 2022, 2024).

582  
583 We follow the methodology of previous studies wherever possible, particularly the RECCAP2 model evaluation  
584 chapter (Terhaar et al., 2024). The Atlantic Meridional Overturning Circulation from the GOBMs is here  
585 defined as the maximum of the Atlantic meridional overturning streamfunction at  $26^\circ N$ . This is compared to  
586 data from the RAPID array at  $26^\circ N$  (Moat et al., 2025). An uncertainty of 0.9 Sv was reported in McCarthy et  
587 al. (2015). We use the years 2005-2023, which are all complete calendar years available from the RAPID data  
588 set, and report the temporal standard deviation over that period.

589  
590 The Southern Ocean sea surface salinity is reported for the subpolar seasonally stratified biome (SPSS) and for  
591 the area covering both the SPSS and subtropical seasonally stratified (STSS) biomes. Biome definitions are  
592 taken from Fay and McKinley (2014, as provided for the RECCAP2 project). The sea surface salinity was first  
593 used as an emergent constraint for the Southern Ocean  $CO_2$  uptake with Earth System Models (Terhaar et al.  
594 2021, 2022) using the interfrontal salinity between the polar and subtropical fronts with dynamic fronts. As the  
595 GOBMs are forced with reanalysis data, the fronts do not vary as much as in the ESMs, and thus the use of fixed  
596 biomes is justified (Hauck et al., 2023b, Terhaar et al., 2024). We use the time period 2005-2024. The  
597 observational sea surface salinity values are calculated from the EN4 data set (Good et al., 2013; using the  
598 objective analyses – Gouretski and Reseghetti (2010) XBT corrections and Gouretski and Cheng (2020) MBT  
599 corrections) with the aid of the Fay and McKinley (2014) mask.

600  
601 The Southern Ocean stratification index is a simplified version of the metric used in Bourgeois et al. (2022). It is  
602 defined as the difference between in situ density at the surface and at 1000 m depth in the latitudinal band of  
603  $30^\circ S$  to  $55^\circ S$ . Each model provider calculated this metric based on their native model mesh. We use the period  
604 of 2005-2024. The same metric was calculated from the EN4 data set mentioned above (Good et al., 2013).

605  
606 Finally, the global surface ocean Revelle factor is reported. Monthly  $1^\circ \times 1^\circ$  gridded fields were provided by the  
607 modelling groups, based on standard carbonate chemistry routines (e.g., mocsy, Orr & Epitalon, 2015;

608 PyCO2SYS, Humphreys et al., 2022a,b). The observational metrics come from two sources, firstly the gridded  
609 GLODAP data set v2.2016 (Lauvset et al., 2016), which is a climatology centered around the year 2002. For  
610 comparison with GLODAP, the models were subsampled to GLODAP data coverage and to a comparable time  
611 window also centred around 2002 (1997-2007). Secondly, the OceanSODA\_v2023 data set (Gregor and Gruber,  
612 2020, updated) was used, which has all input data available to calculate the surface ocean Revelle factor.  
613 OceanSODA covers a slightly smaller surface area (~96 % of GLODAP) but provides data until 2022. The  
614 period 2005-2022 was used due to data availability and the models were subsampled to the same spatial and  
615 temporal coverage.

616

617 We now also summarize GOBM performance relative to each other using the IOMB framework (Ogunro et al.,  
618 2018, Fu et al., 2022). The International Ocean Model Benchmarking (IOMB) system is a Python–Xarray-based  
619 open-source software framework designed to evaluate the performance of global ocean biogeochemical models.  
620 Building upon the benchmarking principles established by Collier et al. (2018) and Fu et al. (2022), IOMB  
621 provides a systematic approach to assess model skill against a range of observational datasets. IOMB quantifies  
622 model performance using statistical metrics, including bias, root mean square error (RMSE), annual cycle phase,  
623 and spatial distribution. Each of these contributes to an overall performance score (refer to equation 7 in Fu et  
624 al., 2022), which enables objective comparison across models. The IOMB framework has been further expanded  
625 and refined to address uncertainties in the estimation of the ocean carbon sink (IOMB-GCBv1). In this updated  
626 version, several new diagnostics were introduced, including the Revelle factor, Southern Ocean SPSS biome  
627 surface salinity, Southern Ocean stratification index, Atlantic Meridional Overturning Circulation (AMOC), and  
628 CO<sub>2</sub> fugacity. These metrics enhance the system’s ability to evaluate model skill in reproducing critical physical  
629 and biogeochemical processes that influence the global ocean carbon sink. This version of IOMB also  
630 incorporates time-series analysis capabilities, where the overall model score is computed as a combination of the  
631 bias score and the Taylor score (depends on the normalized standard deviation and correlation). The final  
632 benchmark visualization presents Z-score normalized results, enabling fair comparison of model performance  
633 relative to each other across multiple variables and metrics. Figure S6 illustrates the evaluation results from  
634 IOMB-GCBv1, where key variables of interest are assessed against state-of-the-art observational datasets. The  
635 model climatology for the period 2000–2024 is compared with corresponding observational climatologies to  
636 evaluate model performance in simulating upper-ocean physics and biogeochemistry.

637

638 To assess upper-ocean physical processes, the variables sea surface temperature (SST), sea surface salinity  
639 (SSS), mixed layer depth (MLD), Southern Ocean stratification index, Southern Ocean SPSS biome salinity,  
640 and Atlantic Meridional Overturning Circulation (AMOC) were analyzed. For temperature and salinity,  
641 individual performance scores are computed relative to WOA2023 (Locarnini et al., 2023, Reagan et al., 2023)  
642 and GLODAPv2-2023 (Lauvset et al., 2024) observations, and an overall score is derived by combining both.  
643 The mixed layer depth, a key indicator of upper and interior ocean exchange, is evaluated using multiple  
644 observational products, including Sallée et al. (2021), de Boyer Montégut (2023), and de Boyer Montégut et al.  
645 (2004). The RAPID 26°N AMOC observational record (2005–2023) is used to assess the modeled AMOC  
646 strength (Moat et al., 2025). The EN4.2.2 dataset (2005–2024, Good et al., 2013) provides the basis for  
647 evaluating both the Southern Ocean stratification index and SPSS biome salinity.

648

649 To evaluate carbonate chemistry, model-simulated surface total alkalinity and dissolved inorganic carbon (DIC)  
650 are compared against GLODAPv2-2023 observations. For the Revelle factor, we use GLODAPv2-2023  
651 (derived using PyCO2SYS v1.8 package, Humphreys et al., 2022) and the OceanSODA\_ETHZ observation-  
652 based data set (Gregor and Gruber, 2020 updated). Finally, CO<sub>2</sub> fugacity from the models is compared against  
653 SOCATv2025 (Bakker et al., 2025) to complete the evaluation.

### 654 ***S3.4 fCO<sub>2</sub>-product evaluation***

655 To benchmark the performance of 9 *f*CO<sub>2</sub>-products included this year, we compare the suite of 9 *f*CO<sub>2</sub> products  
656 to independent observations that have not been included in any training/regression step of the methods, i.e.  
657 direct *f*CO<sub>2</sub> measurements from the Surface Ocean CO<sub>2</sub> Atlas (Bakker et al., 2016) that received a quality flag E  
658 (uncertainty less than 10 μatm) and calculated *f*CO<sub>2</sub> from surface ocean measurements of dissolved inorganic  
659 carbon and total alkalinity with quality flag of at least 2 from the Global Ocean Data Analysis Project  
660 (GLODAP, Lauvset et al. 2024) of the top 10 meters, via the CO2sys carbonate system calculation software  
661 (Sharp et al., 2020), using the dissociation constants of Lueker et al. (2000). Additionally, we use temperature-  
662 corrected SOCAT flag E *f*CO<sub>2</sub> measurements (from Ford et al., 2025) for comparisons with JMA-MLR and  
663 UExp-FNN-U for consistency. Both sets of measurements carry inherent larger uncertainty than the SOCAT  
664 measurements the *f*CO<sub>2</sub>-products are based on, however, their independent nature and spatial extent allows us to  
665 further investigate regional biases in *f*CO<sub>2</sub>-products.

666

667 Interestingly, Figure S7 reveals overall close to zero or negative biases in all products, with the exception of the  
668 GLODAP comparison in the region north of 30°N, highlighting a tendency of the *f*CO<sub>2</sub>-products to  
669 underestimate the sea surface fugacity of the observations. We find the smallest errors in the Southern  
670 Hemisphere south of 30°S in all *f*CO<sub>2</sub>-products, i.e. a region that has substantially less seasonal data coverage  
671 compared to the northern hemisphere and where we find the largest trend divergence between GOBMs and  
672 *f*CO<sub>2</sub>-products (see main text and below). Overall, *f*CO<sub>2</sub> products perform better against calculated GLODAP  
673 measurements compared to SOCAT flag E data, but with biases within the expected measurement uncertainty  
674 (up to 10 μatm). There are only 4 exceptions where biases are beyond the expected uncertainty range of the  
675 measurements, i.e. in the Northern Hemisphere, where UExp-FNN-U (-40.47 μatm), Jena-MLS (22.20 μatm)  
676 and OceanSODA-ETHv2 (13.49 μatm) show larger biases and in the tropics where OceanSODA-ETHv2  
677 (10.29 μatm) falls just outside the 10 μatm range. Larger spreads, represented by the RMSE exist in the north  
678 compared to SOCAT flag E data in the same products that illustrated the largest bias (with RMSE exceeding  
679 100 μatm), however, the impact on the resulting global bias and RMSE remains small due to the very limited  
680 number of measurements in this region, explaining the larger bias and local spread. The global comparison  
681 reveals a better agreement with GLODAP measurements (mean bias of -2.03 μatm) compared to SOCAT flag E  
682 data (mean of -6.25 μatm), however, for all products within the estimated measurement uncertainty.

683

684 This year, we also update the trend benchmark analysis using a set of 5 GOBM's, namely CESM-ETHZ,  
685 FESOM2.1-REcoM, MRI-ESM2, IPSL and NorESM, that were submitted to the GCB2023 (Friedlingstein et  
686 al., 2023) following the approach of Hauck et al. (2023a). A total of 7 *f*CO<sub>2</sub>-products conducted the benchmark

687 test (VLIZ-SOMFFN, NIES-ML3, Jena-MLS, CSIR-ML6, OceanSODA-ETHZv2, JMA-MLR and UExP-FNN-  
688 U). The GOBMs serve as known truth and are subsampled according to the real-world observation tracks. The  
689  $f\text{CO}_2$ -products then reconstruct the true model field, based on the subsampled information provided. We then  
690 compare trends for the period 2001-2021, i.e. the period where we see the divergence between  $f\text{CO}_2$ -products  
691 and models, removing the final year to avoid the tail effect. The trends of the individual  $f\text{CO}_2$ -products from the  
692 GCB2025 were then plotted against the mean of the trend reconstruction bias (evaluated against the known truth  
693 GOBM trends) of the 5 GOBMs. This is shown in Figure S8. The figure illustrates the tendency that  $f\text{CO}_2$ -  
694 products with negative biases in the  $f\text{CO}_2$  reconstruction show the strongest air-sea  $\text{CO}_2$  flux trends and vice  
695 versa for the  $f\text{CO}_2$  products with positive biases. Globally, the ensemble of 7  $f\text{CO}_2$  methods suggest a mean  
696 trend of  $0.58 \pm 0.20 \text{ PgC yr}^{-1} \text{ decade}^{-1}$  (mean and standard deviation across the y-axis of Figure S8). Figure S8  
697 also suggests a tendency of the products to underestimate the global  $f\text{CO}_2$  trend by  $-0.29 \pm 0.65 \text{ ppm decade}^{-1}$   
698 compared to the model truth (mean and standard deviation across the x-axis in Figure S8). Due to compensating  
699 negative and positive  $f\text{CO}_2$  biases, the ensemble mean trend bias is smaller than suggested from previous  
700 studies focusing on one or two  $f\text{CO}_2$ -products only (see e.g. Gloege et al. 2021, Hauck et al. 2023a). The  
701 inferred global flux trend of  $0.50 \pm 0.13 \text{ PgC yr}^{-1} \text{ decade}^{-1}$  that intercepts with the zero bias line is smaller than  
702 the mean trend suggested by the 7  $f\text{CO}_2$ -products, but larger than in previous versions due to the addition of one  
703 extra method and a fifth model, however, it still is within the combined uncertainty estimate of a recent  
704 estimate by Mayot et al. (2024) of  $0.42 \pm 0.06 \text{ PgC yr}^{-1} \text{ decade}^{-1}$  (period 2000-2022) in the mean, although with a  
705 substantially larger uncertainty and different time period. The evidence basis, thus, remains low due to the small  
706 sample size of  $f\text{CO}_2$ -products ( $n = 7$ ) and reconstructed GOBMs ( $n = 5$ ).

### 707 ***S3.5 Uncertainty assessment for $S_{\text{OCEAN}}$***

708 We quantify the 1- $\sigma$  uncertainty around the mean ocean sink of anthropogenic  $\text{CO}_2$  by assessing random and  
709 systematic uncertainties for the GOBMs and  $f\text{CO}_2$ -products. The random uncertainties are taken from the  
710 ensemble standard deviation ( $0.3 \text{ GtC yr}^{-1}$  for GOBMs,  $0.3 \text{ GtC yr}^{-1}$  for  $f\text{CO}_2$ -products). We derive the GOBMs  
711 systematic uncertainty by the mean deviation from the observation-based anthropogenic carbon inventory  
712 changes (Gruber et al. (2019); Müller et al., 2023; DeVries, 2022) reported in Section 3.6.5 ( $0.3 \text{ GtC yr}^{-1}$ ) and  
713 suggest these are related to physical transport (mixing, advection) into the ocean interior. For the  $f\text{CO}_2$ -products,  
714 we consider systematic uncertainties stemming from uncertainty in  $f\text{CO}_2$  observations ( $0.2 \text{ GtC yr}^{-1}$ , Takahashi  
715 et al., 2009; Wanninkhof et al., 2013), gas-transfer velocity ( $0.2 \text{ GtC yr}^{-1}$ , Ho et al., 2011; Wanninkhof et al.,  
716 2013; Roobaert et al., 2018), wind product ( $0.1 \text{ GtC yr}^{-1}$ , Fay et al., 2021), river flux adjustment ( $0.3 \text{ GtC yr}^{-1}$ ,  
717 Regnier et al., 2022, formally 2- $\sigma$  uncertainty), and  $f\text{CO}_2$  mapping ( $0.2 \text{ GtC yr}^{-1}$ , Landschützer et al., 2014).  
718 Combining these uncertainties as their squared sums, we assign an uncertainty of  $\pm 0.4 \text{ GtC yr}^{-1}$  to the GOBMs  
719 ensemble mean and an uncertainty of  $\pm 0.6 \text{ GtC yr}^{-1}$  to the  $f\text{CO}_2$ -product ensemble mean, which is smaller than a  
720 recent estimate by Ford et al. (2024), who estimate an uncertainty of  $\pm 0.7 \text{ GtC yr}^{-1}$  based on propagating  
721 different sources of uncertainty in  $f\text{CO}_2$ -products. Here, the uncertainties are propagated as  $\sigma(S_{\text{OCEAN}}) = 0.5^*$   
722  $(0.4^2 + 0.6^2)^{1/2} \text{ GtC yr}^{-1}$  and result in an  $\pm 0.4 \text{ GtC yr}^{-1}$  uncertainty around the best estimate of  $S_{\text{OCEAN}}$ .

723

724 We examine the consistency between the variability of the GOBMs and the  $f\text{CO}_2$ -products to assess confidence  
725 in  $S_{\text{OCEAN}}$ . Individual estimates (both GOBMs and  $f\text{CO}_2$  products) generally produce a higher ocean  $\text{CO}_2$  sink

726 during strong El Niño events. There is emerging agreement between GOBMs and  $f\text{CO}_2$ -products on the patterns  
727 of decadal variability of  $S_{\text{OCEAN}}$  with a global stagnation in the 1990s and an extra-tropical strengthening in the  
728 2000s (McKinley et al., 2020, Hauck et al., 2020). More recently, a fast growth of the sink is simulated by both  
729 methods between 2001 and 2016, and a stagnation period since then. A stagnation or even decline of  $S_{\text{OCEAN}}$   
730 occurred during the triple La Niña years 2020-2023. The central estimates of the annual flux from the GOBMs  
731 and the  $f\text{CO}_2$ -products have a correlation  $r$  of 0.98 (1990-2024). The agreement between the models and the  
732  $f\text{CO}_2$ -products reflects some consistency in their representation of underlying variability since there is little  
733 overlap in their methodology or use of observations.

### 734 ***S3.6 Observation-based estimates of carbon storage changes in the ocean interior***

735 We rely on three observation-based methods to quantify temporal changes in dissolved inorganic carbon (DIC)  
736 in the ocean interior, differing in their underlying observations, gap-filling approach, temporal resolution and the  
737 type of carbon fluxes they resolve.

738  
739 The extended multiple linear regression (eMLR) method (Müller et al., 2023; Gruber et al., 2019) applied to the  
740 tracer  $C^*$  builds on observations of DIC, total alkalinity, phosphate, oxygen and other physical and  
741 biogeochemical variables from GLODAPv2 (Lauvset et al., 2022) collected during repeat surveys. The method  
742 calculates a quasi-conservative tracer  $C^*$ , separating biological from anthropogenic carbon variability, and fits  
743 regional multiple regressions of  $C^*$  against temperature, salinity, oxygen, and nutrients for individual water  
744 masses separated along neutral density surfaces. Finally, these regional MLR regressions are applied to global  
745 climatological fields to map the decadal change in anthropogenic carbon as the differences between survey  
746 periods. The data sets provide a 13-year estimates for the period 1994-2007 (Gruber et al., 2019) and decadal  
747 estimates for the period 1994-2004 and 2004-2014 (Müller et al., 2023).

748  
749 The Ocean Circulation Inverse Model (OCIM; DeVries, 2022) uses an observation-constrained steady-state  
750 ocean circulation model that assimilates temperature, salinity, CFCs, and radiocarbon to reconstruct the large-  
751 scale transport field. An abiotic carbon cycle module is then forced with the evolving atmospheric  $p\text{CO}_2$  (partial  
752 pressure of  $\text{CO}_2$ ) to simulate air-sea  $\text{CO}_2$  fluxes and interior carbon storage. Because biological and internal  
753 biogeochemical feedbacks are excluded, OCIM isolates the anthropogenic component of the ocean carbon sink.  
754 OCIM covers the period 1990 to 2020.

755  
756 The Mapped Observation-Based Oceanic DIC (MOBO-DIC; Keppler et al., 2023) approach employs a two-step  
757 approach of self-organizing maps and feed-forward neural networks trained on ship-based DIC measurements  
758 from GLODAPv2 and corresponding environmental predictors such as temperature, salinity, nutrients, oxygen  
759 for the upper ocean and atmospheric  $p\text{CO}_2$ . The trained models reconstruct monthly global ocean interior DIC  
760 fields at  $1^\circ$  resolution for 2004–2019. As MOBO-DIC is based on total DIC observations without separating the  
761 anthropogenic component, it resolves the combined anthropogenic plus natural DIC changes.

762  
763

764 To scale eMLR(C\*)-based estimates to full decades (1990s, 2000s) reported in Table 6, the cumulative ocean  
765 carbon storage change over the original base periods (1994-2004-2014) was divided by the corresponding  
766 atmospheric CO<sub>2</sub> increase (NOAA/GML global mean CO<sub>2</sub>) to obtain a sink efficiency (Pg C ppm<sup>-1</sup>), following  
767 Müller et al. (2023). These efficiencies were then multiplied by the observed atmospheric CO<sub>2</sub> change over the  
768 closest target decade, assuming proportionality between atmospheric CO<sub>2</sub> growth and oceanic CO<sub>2</sub> uptake.  
769 OCIM and eMLR(C\*) estimates were further adjusted for non-steady changes in natural DIC storage, obtained  
770 from the ensemble of GOBMs (Sim D - Sim B), to obtain estimates formally consistent with the definition of  
771  $S_{OCEAN}$ . In Table 6, the mean and range are provided for all members of the ensemble of three ocean interior  
772 estimates (OCIM, eMLR(C\*), MOBO-DIC) that cover the full reported decade.  
773

## 774 **S.4 Methodology Land CO<sub>2</sub> sink $S_{LAND}$**

### 775 **S.4.1 DGVM simulations**

776 The DGVMs model runs were forced by either the merged monthly Climate Research Unit (CRU) and 6 hourly  
777 Japanese 3-quarter century Reanalysis (JRA-3Q) data set or by the monthly CRU data set, both providing  
778 observation-based temperature, precipitation, and incoming surface radiation on a 0.5°x0.5° grid and updated to  
779 2024 (Harris et al., 2014, 2020). The combination of CRU monthly data with 6 hourly forcing from JRA-3Q  
780 (Kobayashi et al., 2015) is performed with methodology used in previous years (Viovy, 2016) adapted to the  
781 specifics of the JRA-3Q data.

782 Introduced in GCB2021 (Friedlingstein et al., 2022a), incoming short-wave radiation fields take into account  
783 aerosol impacts and the division of total radiation into direct and diffuse components as summarised below.

784 The diffuse fraction dataset offers 6-hourly distributions of the diffuse fraction of surface shortwave fluxes over  
785 the period 1901-2024. Radiative transfer calculations are based on monthly-averaged distributions of  
786 tropospheric and stratospheric aerosol optical depth, and 6-hourly distributions of cloud fraction. Methods  
787 follow those described in the Methods section of Mercado et al. (2009), but with updated input datasets.

788 The time series of speciated tropospheric aerosol optical depth is taken from the historical and RCP8.5  
789 simulations by the HadGEM2-ES climate model (Bellouin et al., 2011). To correct for biases in HadGEM2-ES,  
790 tropospheric aerosol optical depths are scaled over the whole period to match the global and monthly averages  
791 obtained over the period 2003-2020 by the CAMS Reanalysis of atmospheric composition (Inness et al., 2019),  
792 which assimilates satellite retrievals of aerosol optical depth.

793 The time series of stratospheric aerosol optical depth is taken from the by Sato et al. (1993) climatology, which  
794 has been updated to 2012. Years 2013-2020 are assumed to be background years so replicate the background  
795 year 2010. That assumption is supported by the Global Space-based Stratospheric Aerosol Climatology time  
796 series (1979-2016; Thomason et al., 2018). The time series of cloud fraction is obtained by scaling the 6-hourly  
797 distributions simulated in the Japanese Reanalysis (Kobayashi et al., 2015) to match the monthly-averaged cloud  
798 cover in the CRU TS v4.06 dataset (Harris et al., 2020). Surface radiative fluxes account for aerosol-radiation  
799 interactions from both tropospheric and stratospheric aerosols, and for aerosol-cloud interactions from  
800 tropospheric aerosols, except mineral dust. Tropospheric aerosols are also assumed to exert interactions with  
801 clouds. The radiative effects of those aerosol-cloud interactions are assumed to scale with the radiative effects of  
802 aerosol-radiation interactions of tropospheric aerosols, using regional scaling factors derived from HadGEM2-

803 ES. Diffuse fraction is assumed to be 1 in cloudy sky. Atmospheric constituents other than aerosols and clouds  
804 are set to a constant standard mid-latitude summer atmosphere, but their variations do not affect the diffuse  
805 fraction of surface shortwave fluxes.

806 In addition to the climate forcing, the DGVMs forcing also include the global atmospheric CO<sub>2</sub> time series,  
807 same as for the GOBMs and described in Section S.3.2 (Lan et al. (2023)), the gridded land cover changes (see  
808 Supplement S.2.2), and the gridded nitrogen deposition and fertilisers (see Table S1 for specific models details).  
809 Four simulations were performed with each of the DGVMs.

810 Four simulations are performed with the DGVMs.

- 811 • Simulation 0 (S0) is a control simulation which uses fixed pre-industrial (year 1700) atmospheric CO<sub>2</sub>  
812 concentrations, cycles early 20th century (1901-1920) climate and applies a time-invariant pre-  
813 industrial land cover distribution and pre-industrial wood harvest rates.
- 814 • Simulation 1 (S1) differs from S0 by applying historical changes in atmospheric CO<sub>2</sub> concentration  
815 and N inputs.
- 816 • Simulation 2 (S2) applies historical changes in atmospheric CO<sub>2</sub> concentration, N inputs, and climate,  
817 while applying time-invariant pre-industrial land cover distribution and pre-industrial wood harvest  
818 rates.
- 819 • Simulation 3 (S3) applies historical changes in atmospheric CO<sub>2</sub> concentration, N inputs, climate, and  
820 land cover distribution and wood harvest rates.

821 S2 is used to estimate the land sink component of the global carbon budget ( $S_{LAND}$ ). S3 is used to estimate the  
822 total land flux but is not used in the global carbon budget. We further separate  $S_{LAND}$  into contributions from  
823 CO<sub>2</sub> (=S1-S0) and climate (=S2-S1+S0).

824

#### 825 **S.4.2 RSS correction**

826 New for GCB2025 we correct  $S_{LAND}$  for a known bias due to the simulation protocol for the S2 simulation,  
827 whereby land cover is fixed at 1700 values. This leads to too high forest cover at global scale in the present day.  
828 Historical land-use change was dominated by transitions from vegetation types that can provide a large carbon  
829 sink per area unit (typically, forests) to others less efficient in removing CO<sub>2</sub> from the atmosphere (typically,  
830 croplands). This overestimate in the  $S_{LAND}$  is referred to as Replaced Sinks and Sources (RSS) and represents the  
831 difference between natural sinks under pre-industrial vs. historical land cover (Dorgeist et al., 2024, O’Sullivan  
832 et al., 2025; Friedlingstein et al. 2025b). To estimate this correction of  $S_{LAND}$ , we use output from 7 DGVMs  
833 (CABLE-POP, CLASSIC, GDSTEM, IBIS, iMAPLE, JSBACH, and LPX-Bern), which were able to output net  
834 biome productivity (NBP) on a Plant Functional Type basis (PFT). Although all DGVMs simulate carbon fluxes  
835 for vegetation on a PFT basis, this is not necessarily the case for heterotrophic respiration from soils. Many  
836 models consider soil carbon pools as well-mixed and do not associate with individual PFTs.  $S_{LAND}$  from the S2  
837 simulation is corrected by weighting the PFT-level NBP of each grid cell by the fractional cover of each PFT in  
838 the S3 simulation in each year, producing a gridcell-mean NBP that reflects the response of the land biosphere  
839 to changes in climate and atmospheric composition, while accounting for realistic land cover. The RSS bias is  
840 calculated as the difference between the original S2  $S_{LAND}$  estimate and the corrected  $S_{LAND}$  for each of the 7  
841 DGVMs. Following O’Sullivan et al. (2025), using a mixed-effects regression an  $S_{LAND}$ -RSS relationship is  
842 derived from this DGVM subset. This amounts to a 19% reduction of  $S_{LAND}$  applied to the remaining 15

843 DGVMs to estimate the corrected  $S_{\text{LAND}}$  (i.e. original  $S_{\text{LAND}}$  - predicted RSS) at the global scale. For the regional  
844 and spatial estimates of  $S_{\text{LAND}}$  in this paper, we use the mean RSS for the 7 model subset to adjust the full  
845 ensemble of DGVMs. See O’Sullivan et al. (2025) for a full description.

#### 846 **S.4.3 DGVM evaluation**

847 We apply three criteria for minimum DGVMs realism by including only those DGVMs with (1) steady state  
848 after spin up, (2) global net land flux ( $S_{\text{LAND}} - E_{\text{LUC}}$ ) that is an atmosphere-to-land carbon flux over the 1990s  
849 ranging between  $-0.3$  and  $2.3 \text{ GtC yr}^{-1}$ , within 90% confidence of constraints by global atmospheric and oceanic  
850 observations (Keeling and Manning, 2014; Wanninkhof et al., 2013), and (3) global  $E_{\text{LUC}}$  that is a carbon source  
851 to the atmosphere over the 1990s, as already mentioned in Supplement S.2.2. All DGVMs meet these three  
852 criteria.

853 The International LAnd Model Benchmarking (ILAMB) system (Collier et al. 2018; version 2.7.2 (2024):  
854 <https://github.com/rubisco-sfa/ILAMB/releases/tag/v2.7.2>) is used to compare the 23 models (22 DGVMs and  
855 CARDAMOM) to observational benchmarks for a number of different variables related to the land surface: live  
856 biomass carbon, gross primary productivity (GPP), leaf area index (LAI), ecosystem respiration (heterotrophic +  
857 autotrophic), soil carbon, evapotranspiration, runoff, burned areas, fire  $\text{CO}_2$  emissions, and soil respiration. Each  
858 row for each variable in Figure S11 is clickable in the full website version  
859 ([https://gws-  
860 access.jasmin.ac.uk/public/landsurf\\_rdg/pmcguire/ILAMB\\_output\\_TRENDYv14/TRENDYv14\\_latest/](https://gws-access.jasmin.ac.uk/public/landsurf_rdg/pmcguire/ILAMB_output_TRENDYv14/TRENDYv14_latest/)) and  
861 gives access to geographic plots for such quantities as bias relative to observational benchmark, temporal RMSE  
862 from the observational benchmark, and difference in max month from the observational benchmark. The full  
863 website version also gives a spatial Taylor diagram for all the models, as well as time series comparisons of the  
864 regional mean time-series and the regional mean annual cycle.

865 This year, we include Biomass Carbon in the ILAMB analysis, wherein we add a time-dependent annual dataset,  
866 ESACCI6.0 (Santoro et al. 2024), for the years 2015-2022, and a time-dependent annual dataset XuSaatchi (Xu  
867 et al., 2021), for the years 2000-2019. For the ESACCI dataset, the ESACCI6.0 dataset, and the XuSaatchi  
868 dataset, we use an approximate, global, linearized, allometric root-to-shoot ratio (RSR) of 0.275 to convert  
869 above-ground biomass to total above-ground + below-ground biomass (multiplying by  $1.0 + \text{RSR}$ ).

870 In the ILAMB setup for TRENDYv13 (GCB2024), we added three extra variables (annual-averaged Burned  
871 Area, Fire Emissions, and Soil Respiration). In addition for TRENDY-GCB2025 the following changes are  
872 made:

- 873 1) Modified the Koven et al., (2017) analysis slightly for the Soil Carbon variable, when masking  
874 out arid regions;
- 875 2) Added annually-averaged observational data sets for GFED5 for both Burned Area and Fire  
876 Emissions (Chen et al. 2023);
- 877 3) Enabled a pre-existing ILAMB variable for Carbon Dioxide, which uses Net Biome  
878 Production (NBP) over land as an emulator for Carbon Dioxide that is subsequently  
879 transported by atmospheric circulation to the observation sites, as in Liptak et al. (2017).

880 The new variables in GCB2024/25 are assigned into the category, ‘Ecosystem and Carbon Cycle Extended’.  
881 Variables in this category do not affect the overall scores for the category ‘Ecosystem and Carbon Cycle’. For  
882 TRENDY-GCB2025, Burned Area from two models (EDv3 and SDGVM) are corrected in post-processing to  
883 mask out fuel limited regions (i.e. grid cells with no vegetation or with no carbon emissions due to fire).  
884 A row for the total score is added to the ILAMB summary page, and this total score is called ‘Hydrology and  
885 Carbon Cycles’. The total score is the weighted average of the ‘Hydrology Cycle’ (weight of 2, since there are 2  
886 variables under Hydrology Cycle) and the ‘Ecosystem and Carbon Cycle’ (weight of 5, since there are 5  
887 variables under the Ecosystem and Carbon Cycle).  
888 The TRENDY-GCB2025 version of the updated ILAMB version 2.7.2 GitHub code fork/branch is available at:  
889 <https://github.com/mcguirepatr/ILAMB/tree/master>

#### 890 ***S.4.4 Uncertainty assessment for $S_{LAND}$***

891 For the uncertainty for  $S_{LAND}$ , we use the standard deviation of the annual  $CO_2$  sink across the DGVMs,  
892 averaging to about  $\pm 0.6 \text{ GtC yr}^{-1}$  for the period 1959 to 2024. We attach a medium confidence level to the  
893 annual land  $CO_2$  sink and its uncertainty because the estimates from the residual budget and averaged DGVMs  
894 match well within their respective uncertainties (Table 5).  
895

## 896 **S.5 Methodology Atmospheric Inversions**

### 897 ***S.5.1 Inversion System Simulations***

898 Fourteen atmospheric inversions (details of each in Table S4) were used to infer the spatio-temporal distribution  
899 of the  $CO_2$  flux exchanged between the atmosphere and the land or oceans. These inversions are based on  
900 Bayesian inversion principles with prior information on fluxes and their uncertainties. They use very similar sets  
901 of surface measurements of  $CO_2$  time series (or subsets thereof) from various flask and in situ networks. Six  
902 inversion systems used surface observations, and eight inversion systems used satellite  $XCO_2$  retrievals from  
903 GOSAT and/or OCO-2, of which three systems used a combination of satellite and surface observations.  
904 Each inversion system uses different methodologies and input data but is rooted in Bayesian inversion  
905 principles. These differences mainly concern the selection of atmospheric  $CO_2$  data and prior fluxes, as well as  
906 the spatial resolution, assumed correlation structures, and mathematical approach of the models. Each system  
907 uses a different transport model, which was demonstrated to be a driving factor behind differences in  
908 atmospheric inversion-based flux estimates, and specifically their distribution across latitudinal bands (Gaubert  
909 et al., 2019; Schuh et al., 2019).  
910 Most of the fourteen inversion systems prescribe similar global fossil fuel emissions for  $E_{FOS}$ ; specifically, the  
911 GCP’s Gridded Fossil Emissions Dataset version 2025.1 (GCP-GridFEDv2025.1; Jones et al., 2025), which is  
912 an update through 2024 of the first version of GCP-GridFED presented by Jones et al. (2021b) (Table S4). All  
913 GCP-GridFED versions scale gridded estimates of  $CO_2$  emissions from EDGARv4.3.2 (Janssens-Maenhout et  
914 al., 2019) within national territories to match national emissions estimates provided by the GCP for the years  
915 1959-2024, which are compiled following the methodology described in Supplement S.1. GCP-  
916 GridFEDv2025.1 adopts the seasonality of emissions (the monthly distribution of annual emissions) from the

917 Carbon Monitor (Liu et al., 2020a,b; Dou et al., 2022) for Brazil, China, all EU27 countries, the United  
918 Kingdom, the USA and shipping and aviation bunker emissions. The seasonality present in Carbon Monitor is  
919 used directly for years 2019-2024, while for years 1959-2018 the average seasonality of 2019, and 2021 and  
920 2022 are applied (avoiding the year 2020 during which emissions were most impacted by the COVID-19  
921 pandemic). For all other countries, seasonality of emissions is taken from EDGAR (Janssens-Maenhout et al.,  
922 2019; Jones et al., 2023), with small annual correction to the seasonality present in 2010 based on heating or  
923 cooling degree days to account for the effects of inter-annual climate variability on the seasonality of emissions  
924 (Jones et al., 2021b).

925 Small remaining differences between regriding of the GridFED inputs, or the use of different fossil fuel  
926 emission priors are corrected for by scaling the resulting inverse fluxes to GridFEDv2025.1. The consistent use  
927 of  $E_{\text{FOS}}$  ensures a close alignment with the estimate of  $E_{\text{FOS}}$  used in this budget assessment, enhancing the  
928 comparability of the inversion-based estimate with the flux estimates deriving from DGVMs, GOBMs and  
929  $f\text{CO}_2$ -based methods. The fossil fuel adjustment (including emissions from cement production and cement  
930 carbonation  $\text{CO}_2$  sink) ensures that the estimated uptake of atmospheric  $\text{CO}_2$  by the land and oceans was fully  
931 consistent within the inversion ensemble.

932 The land and ocean  $\text{CO}_2$  fluxes from atmospheric inversions contain anthropogenic perturbation and natural pre-  
933 industrial  $\text{CO}_2$  fluxes. On annual time scales, natural pre-industrial fluxes are primarily land  $\text{CO}_2$  sinks and  
934 ocean  $\text{CO}_2$  sources corresponding to carbon taken up on land, transported by rivers from land to ocean, and  
935 outgassed by the ocean. These pre-industrial land  $\text{CO}_2$  sinks are thus compensated over the globe by ocean  $\text{CO}_2$   
936 sources corresponding to the outgassing of riverine carbon inputs to the ocean, using the exact same numbers  
937 and distribution as described for the ocean in Section 2.5. To facilitate the comparison, we adjusted the inverse  
938 estimates of the land and ocean fluxes per latitude band with these numbers to produce historical perturbation  
939  $\text{CO}_2$  fluxes from inversions.

#### 940 ***S.5.2 Inversion System Evaluation***

941 All participating atmospheric inversions are checked for consistency with the annual global growth rate, as both  
942 are derived from the global surface network of atmospheric  $\text{CO}_2$  observations. In this exercise, we use the  
943 conversion factor of  $2.086 \text{ GtC ppm}^{-1}$  to convert the inverted carbon fluxes to mole fractions, as suggested by  
944 Prather (2012). This number is specifically suited for the comparison to surface observations that do not respond  
945 uniformly, nor immediately, to each year's summed sources and sinks. This factor is therefore slightly smaller  
946 than the GCB conversion factor in Table 1 ( $2.142 \text{ GtC ppm}^{-1}$ , Ballantyne et al., 2012). Overall, the inversions  
947 agree with the growth rate with biases between  $0.003\text{-}0.04 \text{ ppm yr}^{-1}$  ( $0.006\text{-}0.08 \text{ GtC yr}^{-1}$ ) for the period 2015-  
948 2024.

949 The atmospheric inversions are also evaluated using vertical profiles of atmospheric  $\text{CO}_2$  concentrations (Figure  
950 S13). More than 50 aircraft programs over the globe, either regular programs or repeated surveys over at least 9  
951 months (except on the SH), have been used to draw a robust picture of the system performance (with space-time  
952 data coverage irregular and denser in the  $0\text{-}45^\circ\text{N}$  latitude band; Table S9 and lower panel in Figure S13). The  
953 fourteen systems are compared to these independent aircraft  $\text{CO}_2$  observations between 2 and 7 km above sea  
954 level between 2001 and 2024. Results are shown in Figure S13, where the inversions generally match the  
955 atmospheric mole fractions to within  $0.6 \text{ ppm}$  at all latitudes.

956

957

## S.6 Methodology Earth System Models (ESMs)

958 The decadal prediction systems based on ESMs used here consist of three sets of simulations: (i) uninitialized  
959 freely evolving historical simulations (1850-2014); (ii) assimilation reconstruction incorporating observational  
960 data into the ESMsmodel (1960-2024); (iii) initialised prediction simulations for the 1981-2025 period, starting  
961 every year from initial states obtained from the above assimilation simulations. The assimilations are designed  
962 to reconstruct the actual evolution of the Earth system by assimilating essential fields from data products. The  
963 assimilations' states, which are expected to be close to observations, are used to start the initialised prediction  
964 simulations used for the current year (2025) global carbon budget. Similar initialised prediction simulations  
965 starting every year (Nov. 1st or Jan. 1st) over the 1981-2024 period (i.e., hindcasts) are also performed for  
966 predictive skill quantification and for bias correction. More details on the illustration of a decadal prediction  
967 system based on an ESM can refer to Figure 1 of Li et al. (2023).

968 Six ESMs, i.e., CanESM5 (Swart et al., 2019; Sospedra-Alfonso et al., 2021), EC-Earth3-CC (Döscher et al. 2021;  
969 Bilbao et al., 2021; Bernardello et al., 2024), IPSL-CM6A-CO2-LR (Boucher et al., 2020), MIROC-ES2L  
970 (Watanabe et al., 2020), MPI-ESM1-2-LR (Mauritsen et al., 2019; Li et al., 2023), and NorCPM-CC (Tjiputra et  
971 al. 2020; Bethke et al. 2021) have performed 10-ensemble members of prediction simulations. Each ESM uses a  
972 different assimilation method and combination of data products incorporated into the model. More details on the  
973 models' configuration can be found in Table 4 and Supplement Table S5. The ESMs use external forcings from  
974 the Coupled Model Intercomparison Project Phase 6 (CMIP6) historical (1960-2014) plus SSP2-4.5 baseline and  
975 CovidMIP two-year blip scenario (2015-2025) (Eyring et al., 2016; Lamboll et al., 2021). The CO<sub>2</sub> emissions  
976 forcing from 2015-2024 are substituted by GCB-GridFED (v2025.0, Jones et al., 2025) to provide a consistent  
977 CO<sub>2</sub> forcing, the CO<sub>2</sub> emissions forcing for year 2025 is an extension with the same emission of the year 2024.

978

979

## S.7 Atmospheric CO<sub>2</sub> time series

980 The 1750-2024 atmospheric CO<sub>2</sub> concentration times series is produced as follows.

981 Since January 1980, we use the CO<sub>2</sub> global growth rate reported by NOAA/GML (Lan et al., 2024). In the  
982 period March 1958-December 1979, we use bias-adjusted values of the global growth rate based on  
983 measurements of atmospheric CO<sub>2</sub> made by the Scripps Institution of Oceanography at the Mauna Loa  
984 Observatory, Hawaii (Keeling et al., 1976; full period of coverage 1758-2024). Bias adjustment of the Scripps  
985 data was performed in three sequential stages as follows:

- 986 • First, to correct for differences in the mean atmospheric concentration of CO<sub>2</sub> at Mauna Loa versus the  
987 globally averaged value, a constant of -0.231 ppm was added to all Scripps data to improve alignment  
988 of the “CO<sub>2</sub>[trend]” values from the Scripps data with the “CO<sub>2</sub>[trend]” values from the global NOAA  
989 data. The value of -0.231 ppm is the mean offset of “CO<sub>2</sub>[trend]” at Mauna Loa from the global  
990 “CO<sub>2</sub>[trend]” value during 1980-2000.
- 991 • Second, to correct for differences in the seasonality of atmospheric CO<sub>2</sub> concentrations at Mauna Loa  
992 versus globally, we shifted monthly anomalies between CO<sub>2</sub> concentration data and “trend” values

993 backward in time by one month in the Scripps data. This specifically corrects for the fact that  
 994 peaks/troughs in the climatology of "CO<sub>2</sub>[monthly\_observation] - CO<sub>2</sub>[trend]" at Mauna Loa occur 1  
 995 month earlier than peaks/troughs in the climatology of "CO<sub>2</sub>[monthly\_observation] - CO<sub>2</sub>[trend]" in the  
 996 global data from NOAA. A one-month shift to the Scripps data was found to optimally align the  
 997 climatologies of "CO<sub>2</sub>[monthly\_observation] - CO<sub>2</sub>[trend]" in the Scripps and global data.

- 998 • Third, to correct for the greater amplitude of seasonal anomalies at Mauna Loa from Scripps than the  
 999 global data from NOAA, we apply a monthly multiplier that dampens the magnitude of monthly  
 1000 anomalies from "trend" values in the Scripps data. The monthly multiplier reduces values of  
 1001 "CO<sub>2</sub>[monthly\_observation] - CO<sub>2</sub>[trend]" in the Scripps data to more closely match values of  
 1002 "CO<sub>2</sub>[monthly\_observation] - CO<sub>2</sub>[trend]" in the NOAA global data.

1003 For the period Jan 1750 to February 1958, we use bias-adjusted values of the global growth rate based on  
 1004 measurements of atmospheric CO<sub>2</sub> from air trapped in ice at Law Dome (Joos and Spahni, 2008; full period of  
 1005 coverage 1750-2004). Bias adjustments were made to improve alignment with the post-1980 time series of data  
 1006 from Scripps and NOAA, and were performed in two sequential stages as follows:

- 1007 • First, a constant of 0.973 was added to all data from Law Dome to improve alignment with the Scripps  
 1008 data (which had already been bias-corrected as described above). The constant of 0.973 is the mean  
 1009 offset of CO<sub>2</sub> annual values (annual mean in the case of the Scripps data) in the period 1958-1979.
- 1010 • Second, the climatology of "CO<sub>2</sub>[monthly\_observation] - CO<sub>2</sub>[trend]" from the period 1958-2000 was  
 1011 superimposed on the data from Law Dome (note that the 1958-2000 data includes both Scripps and  
 1012 NOAA data, combined as described above). To achieve this, a spline interpolation was fitted to  
 1013 downscale annual observations from CO<sub>2</sub> concentration from Law Dome to monthly values of  
 1014 "CO<sub>2</sub>[trend]" and the climatological seasonality of "CO<sub>2</sub>[monthly\_observation] - CO<sub>2</sub>[trend]" from  
 1015 1958-2000) was then added to the interpolated values of "CO<sub>2</sub>[trend]".

1016

## 1017 **S.8 Processes not included in the global carbon budget**

### 1018 ***S.8.1 Contribution of anthropogenic CO and CH<sub>4</sub> to the global carbon budget***

1019 Equation (1) includes only partly the net input of CO<sub>2</sub> to the atmosphere from the chemical oxidation of reactive  
 1020 carbon-containing gases from sources other than the combustion of fossil fuels, such as: (1) cement process  
 1021 emissions, since these do not come from combustion of fossil fuels, (2) the oxidation of fossil fuels, (3) the  
 1022 assumption of immediate oxidation of vented methane in oil production. However, it omits any other  
 1023 anthropogenic carbon-containing gases that are eventually oxidised in the atmosphere, forming a diffuse source  
 1024 of CO<sub>2</sub>, such as anthropogenic emissions of CO and CH<sub>4</sub>. An attempt is made in this section to estimate their  
 1025 magnitude and identify the sources of uncertainty. Anthropogenic CO emissions are from incomplete fossil fuel  
 1026 and biofuel burning and deforestation fires. The main anthropogenic emissions of fossil CH<sub>4</sub> that matter for the  
 1027 global (anthropogenic) carbon budget are the fugitive emissions of coal, oil and gas sectors (see below). These  
 1028 emissions of CO and CH<sub>4</sub> contribute a net addition of fossil carbon to the atmosphere.

1029 In our estimate of E<sub>FOS</sub> we assumed (Section 2.1.1) that all the fuel burned is emitted as CO<sub>2</sub>, thus CO  
 1030 anthropogenic emissions associated with incomplete fossil fuel combustion and its atmospheric oxidation into  
 1031 CO<sub>2</sub> within a few months are already counted implicitly in E<sub>FOS</sub> and should not be counted twice (same for E<sub>LUC</sub>

1032 and anthropogenic CO emissions by deforestation fires). The diffuse atmospheric source of CO<sub>2</sub> deriving from  
1033 anthropogenic emissions of fossil CH<sub>4</sub> is not included in E<sub>FOS</sub>. In reality, the diffuse source of CO<sub>2</sub> from CH<sub>4</sub>  
1034 oxidation contributes to the annual CO<sub>2</sub> growth. Emissions of fossil CH<sub>4</sub> represent 30% of total anthropogenic  
1035 CH<sub>4</sub> emissions (Saunois et al. 2020; their top-down estimate is used because it is consistent with the observed  
1036 CH<sub>4</sub> growth rate), that is 0.083 GtC yr<sup>-1</sup> for the decade 2008-2017. Assuming steady state, an amount equal to  
1037 this fossil CH<sub>4</sub> emission is all converted to CO<sub>2</sub> by OH oxidation, and thus explain 0.083 GtC yr<sup>-1</sup> of the global  
1038 CO<sub>2</sub> growth rate with an uncertainty range of 0.061 to 0.098 GtC yr<sup>-1</sup> taken from the min-max of top-down  
1039 estimates in Saunois et al. (2020). If this min-max range is assumed to be 2 σ because Saunois et al. (2020) did  
1040 not account for the internal uncertainty of their minimum and maximum top-down estimates, it translates into a  
1041 1-σ uncertainty of 0.019 GtC yr<sup>-1</sup>.

1042 Other anthropogenic changes in the sources of CO and CH<sub>4</sub> from wildfires, vegetation biomass, wetlands,  
1043 ruminants, or permafrost changes are similarly assumed to have a small effect on the CO<sub>2</sub> growth rate. The CH<sub>4</sub>  
1044 and CO emissions and sinks are published and analysed separately in the Global Methane Budget and Global  
1045 Carbon Monoxide Budget publications, which follow a similar approach to that presented here (Saunois et al.,  
1046 2020; Zheng et al., 2019).

### 1047 ***S.8.2 Contribution of other carbonates to CO<sub>2</sub> emissions***

1048 Although we do account for cement carbonation (a carbon sink), the contribution of emissions of fossil  
1049 carbonates (carbon sources) other than cement production is not systematically included in estimates of E<sub>FOS</sub>,  
1050 except for Annex I countries and lime production in China (Andrew and Peters, 2025). The missing processes  
1051 include CO<sub>2</sub> emissions associated with the calcination of lime and limestone outside of cement production.  
1052 Carbonates are also used in various industries, including in iron and steel manufacture and in agriculture. They  
1053 are found naturally in some coals. CO<sub>2</sub> emissions from fossil carbonates other than cement not included in our  
1054 dataset are estimated to amount to less than 0.5% of E<sub>FOS</sub> (estimated based on Crippa et al., 2019).

### 1055 ***S.8.3 Anthropogenic carbon fluxes in the land-to-ocean aquatic continuum***

1056 The approach used to determine the global carbon budget refers to the mean, variations, and trends in the  
1057 perturbation of CO<sub>2</sub> in the atmosphere, referenced to the pre-industrial era. Carbon is continuously displaced  
1058 from the land to the ocean through the land-ocean aquatic continuum (LOAC) comprising freshwaters, estuaries,  
1059 and coastal areas (Bauer et al., 2013; Regnier et al., 2013). A substantial fraction of this lateral carbon flux is  
1060 entirely ‘natural’ and is thus a steady state component of the pre-industrial carbon cycle. We account for this  
1061 pre-industrial flux where appropriate in our study (see Supplement S.3). However, changes in environmental  
1062 conditions and land-use change have caused an increase in the lateral transport of carbon into the LOAC – a  
1063 perturbation that is relevant for the global carbon budget presented here.

1064 The results of the analysis of Regnier et al. (2013) can be summarised in two points of relevance for the  
1065 anthropogenic CO<sub>2</sub> budget. First, the anthropogenic perturbation of the LOAC has increased the organic carbon  
1066 export from terrestrial ecosystems to the hydrosphere by as much as 1.0 ± 0.5 GtC yr<sup>-1</sup> since pre-industrial  
1067 times, mainly owing to enhanced carbon export from soils. Second, this exported anthropogenic carbon is partly  
1068 respired through the LOAC, partly sequestered in sediments along the LOAC and to a lesser extent, transferred  
1069 to the open ocean where it may accumulate or be outgassed. The anthropogenic CO<sub>2</sub> outgassing from the LOAC

1070 was recently estimated at  $0.34 \pm 0.26 \text{ GtC yr}^{-1}$  (Regnier et al., 2022; Tian et al., 2023), a significant fraction  
1071 originating from the lateral displacement of  $\text{CO}_2$  produced by soil heterotrophic respiration to the aquatic  
1072 system. The inclusion of LOAC related anthropogenic  $\text{CO}_2$  fluxes should affect estimates of  $S_{\text{LAND}}$  and  $S_{\text{OCEAN}}$   
1073 in Eq. (1) but does not affect the other terms. The GOBMs and DGVMs used in the global carbon budget do not  
1074 include a representation of the anthropogenic perturbation of LOAC  $\text{CO}_2$  fluxes. Here in GCB2025, we apply a  
1075 posteriori correction of  $-0.07 \text{ GtC yr}^{-1}$  to the  $S_{\text{LAND}}$  estimate over the 2015-2024 period as assessed in  
1076 (Friedlingstein et al. 2025b).

**Table S1.** Comparison of the processes included in the bookkeeping method and DGVMs in their estimates of ELUC and SLAND. See Table 4 for model references. All models include deforestation and forest regrowth after abandonment of agriculture (or from afforestation activities on agricultural land). Processes relevant for ELUC are only described for the DGVMs used with land-cover change in this study.

|                                                      | Bookkeeping models |         |             | DGVMs     |         |           |           |      |           |         |           |           |         |         |      |           |          |           |           |           |          |            |         |         |          |          |         |           |
|------------------------------------------------------|--------------------|---------|-------------|-----------|---------|-----------|-----------|------|-----------|---------|-----------|-----------|---------|---------|------|-----------|----------|-----------|-----------|-----------|----------|------------|---------|---------|----------|----------|---------|-----------|
|                                                      | BLUE               | OSCAR   | LUCE        | CABLE-POP | CLASSIC | CLM6.0    | CLM-FATES | DLEM | EDv3      | ELM     | ELM-FATES | GDSTEM    | IBIS    | iMAPLE  | ISAM | JSBACH    | JULES-ES | LPJ-GUESS | LPJmL     | LPJ-EOSIM | LPX-Bern | ORCHIDEEv3 | SDGVM   | VISIT   | VISIT-UT | CARDAMOM |         |           |
| <b>Processes relevant for ELUC</b>                   |                    |         |             |           |         |           |           |      |           |         |           |           |         |         |      |           |          |           |           |           |          |            |         |         |          |          |         |           |
| Wood harvest and forest degradation (a)              | yes                | yes     | yes         | yes       | no      | yes       | yes       | yes  | yes       | yes     | yes       | yes       | yes     | yes     | no   | yes       | yes      | no        | yes (d)   | no        | yes      | no (c)     | yes     | no      | yes      | yes      | yes     | yes (R+L) |
| Shifting cultivation / Subgrid scale transitions     | yes                | yes     | yes         | yes       | no      | yes       | yes       | yes  | yes       | yes     | yes       | yes       | yes     | yes     | no   | no        | yes      | no        | yes       | no        | yes      | no (c)     | no      | no      | yes      | no       | no      | no        |
| Cropland harvest (removed, R, or added to litter, L) | yes (R) (i)        | yes (R) | yes (R) (i) | yes (R)   | yes (k) | yes (R+L) | no        | yes  | yes (R+L) | yes (k) | no        | yes (R+L) | yes (R) | yes (k) | yes  | yes (R+L) | yes (R)  | yes (R)   | yes (R+L) | yes (k)   | yes (R)  | yes (R)    | yes (R) | yes (R) | yes (R)  | yes (R)  | yes (R) | no        |
| Peat fires                                           | yes (j)            | yes (j) | yes (j)     | no        | no      | yes       | no        | yes  | no        | no      | no        | no        | no      | no      | no   | no        | no       | no        | no        | no        | no       | no         | no      | no      | no       | no       | no      | yes (l)   |
| fire as a management tool                            | yes (i)            | yes (g) | yes (i)     | no        | no      | no        | no        | yes  | no        | no      | no        | no        | no      | no      | no   | no        | no       | no        | no        | no        | no       | no         | no      | no      | no       | no       | no      | yes (l)   |
| N fertilisation                                      | yes (i)            | yes (g) | yes (i)     | no        | yes     | yes       | no        | yes  | no        | no      | no        | yes       | yes     | no      | yes  | no        | yes (h)  | yes       | yes       | no        | yes      | yes        | no      | no      | yes      | no       | no      |           |
| tillage                                              | yes (i)            | yes (g) | yes (i)     | no        | yes (f) | yes       | no        | yes  | no        | no      | no        | no (c)    | no      | no      | no   | no        | no       | yes       | yes       | no        | no       | yes (f)    | no      | no      | no       | no       | no      | no        |
| irrigation                                           | yes (i)            | yes (g) | yes (i)     | no        | no      | yes       | no        | yes  | no        | no      | no        | yes       | no      | no      | yes  | no        | no       | yes       | yes       | no        | no       | no         | no      | no      | no       | no       | no      | no        |
| wetland drainage                                     | yes (i)            | yes (g) | yes (i)     | no        | no      | no        | no        | no   | no        | no      | no        | no        | no      | no      | yes  | no        | no       | no        | no        | no        | no       | no         | no      | no      | no       | no       | no      | no        |
| erosion                                              | yes (i)            | yes (g) | yes (i)     | no        | no      | no        | no        | yes  | no        | no      | no        | no        | yes     | no      | no   | no        | no       | no        | no        | no        | no       | no         | no      | no      | yes      | yes      | no      | no        |
| peat drainage                                        | yes (j)            | yes (j) | yes (j)     | no        | no      | no        | no        | no   | no        | no      | no        | no        | no      | no      | no   | no        | no       | no        | no        | no        | no       | no         | no      | no      | no       | no       | no      | no        |

|                                                                                         |             |         |             |                   |     |     |          |     |           |     |          |           |               |        |               |             |               |         |               |         |               |               |                   |         |         |         |  |
|-----------------------------------------------------------------------------------------|-------------|---------|-------------|-------------------|-----|-----|----------|-----|-----------|-----|----------|-----------|---------------|--------|---------------|-------------|---------------|---------|---------------|---------|---------------|---------------|-------------------|---------|---------|---------|--|
| Grazing and mowing Harvest (removed, R, or added to litter, L)                          | yes (R) (i) | yes (R) | yes (r) (i) | yes (R)           | no  | no  | yes (R)  | no  | yes (R+L) | no  | yes (R)  | yes (R+L) | yes           | no     | yes (R, L)    | yes (k)     | no            | yes (R) | yes (R+L)     | yes (k) | no            | no            | no                | no      | no      | no      |  |
| <b>Processes also relevant for SLAND (in addition to CO2 fertilisation and climate)</b> |             |         |             |                   |     |     |          |     |           |     |          |           |               |        |               |             |               |         |               |         |               |               |                   |         |         |         |  |
| ecosystem demography (ED) / vegetation competition (VC)                                 |             |         |             | yes (ED), No (VC) | no  | no  | yes(E D) | no  | yes       | no  | yes(E D) | no        | yes ED, no VC | no     | no ED, yes VC | no (VC (c)) | No ED, Yes VC | yes     | no ED, yes VC | yes     | no ED, yes VC | Some ED no VC | yes (ED), No (VC) | no      | no      | no      |  |
| Fire simulation and/or suppression                                                      | N.A.        | N.A.    | N.A.        | no                | yes | yes | yes      | no  | yes       | yes | yes      | no        | yes           | no     | no            | yes         | yes           | yes     | yes           | yes     | yes           | yes           | no                | yes     | yes     | yes (l) |  |
| Carbon-nitrogen interactions, including N deposition                                    | N.A.        | N.A.    | N.A.        | yes               | yes | yes | no       | yes | no        | yes | no       | yes       | yes           | no (e) | yes           | yes         | yes           | yes     | yes           | no      | yes           | yes           | yes (b)           | no      | no      | no      |  |
| Separate treatment of direct and diffuse solar radiation                                | N.A         | N.A     | N.A         | yes               | no  | yes | yes      | no  | no        | yes | yes      | no        | yes           | yes    | no            | no          | yes           | no      | no            | no      | no            | no            | yes (k)           | yes (k) | yes (k) | no      |  |

- (a) Refers to the routine harvest of established managed forests rather than pools of harvested products.
- (b) Limited. Nitrogen uptake is simulated as a function of soil C, and Vcmax is an empirical function of canopy N. Does not consider N deposition.
- (c) Available but not active.
- (d) without the LUH2 secondary mature, young, and non-forest harvest fractions
- (f) Tillage is represented over croplands by increased soil carbon decomposition rate and reduced humification of litter to soil carbon.
- (g) as far as the DGVMs that OSCAR is calibrated to include it
- (h) perfect fertilisation assumed, i.e. crops are not nitrogen limited and the implied fertiliser diagnosed
- (i) Process captured implicitly by use of observed carbon densities.
- (j) Emissions added from external datasets.
- (k) Diffuse fraction calculated internally, not from external dataset
- (l) Fire occurrence added from external dataset, but C impact simulated.

**Table S2. Comparison of the processes and model set up for the Global Ocean Biogeochemistry Models for their estimates of SOCEAN. See Table 4 for model references.**

|                                                    | NEMO-PlankTOM12              | NEMO4.2-PISCES (IPSL)                  | MICOM-HAMOCC (NorESM-OCv1.2)                                   | MPIOM-HAMOCC6                                                                | FESOM-2.1-REcoM3                                    | NEMO3.6-PISCESv2-gas (CNRM)                            | MOM6-COBALTv3 (Princeton)                                         | CESM-ETHZ                                              | MRI-ESM2-4                                   | ACCESS (CSIRO)                                                                        |
|----------------------------------------------------|------------------------------|----------------------------------------|----------------------------------------------------------------|------------------------------------------------------------------------------|-----------------------------------------------------|--------------------------------------------------------|-------------------------------------------------------------------|--------------------------------------------------------|----------------------------------------------|---------------------------------------------------------------------------------------|
| <b>Model specifics</b>                             |                              |                                        |                                                                |                                                                              |                                                     |                                                        |                                                                   |                                                        |                                              |                                                                                       |
| Physical ocean model                               | NEMOv3.6-ORCA2               | NEMOv4.2-eORCA1L75                     | MICOM (NorESM-OCv1.2)                                          | MPIOM                                                                        | FESOM-2.1                                           | NEMOv3.6-GELATOV6-eORCA1L75                            | MOM6-SIS2                                                         | CESMv1.3 (ocean model based on POP2)                   | MRI.COMv5                                    | MOM5                                                                                  |
| Biogeochemistry model                              | PlankTOM12                   | PISCESv2                               | HAMOCC (NorESM-OCv1.2)                                         | HAMOCC6                                                                      | REcoM-3                                             | PISCESv2-gas                                           | COBALTv3                                                          | BEC (modified & extended)                              | NPZD+Fe                                      | WOMBAT                                                                                |
| Horizontal resolution                              | 2° lon, 0.3 to 1.5° lat      | 1° lon, 0.3 to 1° lat                  | 1° lon, 0.17 to 0.25 lat                                       | 1.5°                                                                         | unstructured mesh, 20-120 km resolution (CORE mesh) | 1° lon, 0.3 to 1° lat                                  | 1° lon, 0.5-1° lat (360x210)                                      | 1.125° lon, 0.53° to 0.27° lat                         | 1.0° lon, 0.3 to 0.5° lat                    | 1°x1° with enhanced latitudinal resolution in the tropics and high-lat Southern Ocean |
| Vertical resolution                                | 31 levels                    | 75 levels, 1m at the surface           | 51 isopycnic layers + 2 layers representing a bulk mixed layer | 40 levels                                                                    | 46 levels, 10 m spacing in the top 100 m            | 75 levels, 1m at surface                               | 75 levels hybrid coordinates, 2m at surface                       | 60 levels                                              | 60 levels with 1-level bottom boundary layer | 50 levels, 20 in the top 200m                                                         |
| Total ocean area on native grid (km <sup>2</sup> ) | 3.6080E+08                   | 3.6360E+08                             | 3.6006E+08                                                     | 3.6598E+08                                                                   | 3.6435E+08                                          | 3.6270E+14                                             | 3.6137E+14                                                        | 3.5926E+08                                             | 3.6094E+08                                   | 3.6134E+08                                                                            |
| Gas-exchange parameterization                      | Wanninkhof et al (1992)      | Orr et al., 2017                       | Orr et al., 2017, but with a=0.337                             | Orr et al., 2017                                                             | Orr et al., 2017                                    | Orr et al., 2017; Wanninkhof et al. 2014               | Deike et al., (2025) wind-wave-bubble formulation                 | Wanninkhof (1992, coefficient a scaled down to 0.31)   | Orr et al., 2017                             | Wanninkhof et al (1992)                                                               |
| CO <sub>2</sub> chemistry routines                 | OCMIP2 (Orr et al. 2017)     | mocsy                                  | Following Dickson et al. 2007                                  | Ilyina et al. (2013) adapted to comply with OMIP protocol (Orr et al., 2017) | mocsy                                               | mocsy                                                  | mocsy                                                             | OCMIP2 (Orr et al. 2017)                               | mocsy                                        | OCMIP2 (Orr et al. 2017)                                                              |
| River input (PgC/yr) (organic/inorganic DIC)       | 0.723 / -                    | 0.9167 (0.2577 / 0.659)                | 0                                                              | 0.77 / -                                                                     | 0 / 0                                               | 0.611 / -                                              | 0.2139 / 0.7119                                                   | 0.33 / -                                               | 0 / 0                                        | 0/0                                                                                   |
| Net flux to sediment (PgC/yr) (organic/other)      | 0.723 / -                    | 0.3997 (0.0889 / 0.3138)               | around 0.54 / -                                                | 0.71/-                                                                       | 0 / 0                                               | around 0.656 / -                                       | ~0.166 / ~0.145 (CaCO <sub>3</sub> )                              | 0.21 / -                                               | 0 / 0                                        | 0/0                                                                                   |
| <b>SPIN-UP procedure</b>                           |                              |                                        |                                                                |                                                                              |                                                     |                                                        |                                                                   |                                                        |                                              |                                                                                       |
| Initialisation of carbon chemistry                 | GLODAPv2 (preindustrial DIC) | GLODAPv2 (preindustrial DIC)           | GLODAPv1 (preindustrial DIC)                                   | initialization from previous simulation                                      | GLODAPv2 (preindustrial DIC)                        | GLODAPv2                                               | GLODAPv2 (Alkalinity, DIC)                                        | GLODAPv2 (preindustrial DIC)                           | GLODAPv2 (preindustrial DIC)                 | GLODAPv1 preindustrial DIC                                                            |
| Preindustrial spin-up prior to 1850                | spin-up 1750-1940            | ~300 yrs with xCO <sub>2</sub> =278ppm | 1000 year spin up (prior to 1762)                              | ~2000 years                                                                  | 189 years                                           | long spin-up (> 1000 years) from 1750 fixed conditions | Spin-up 792 years before the year 1766 with xCO <sub>2</sub> =278 | 500 years before year 1780 with xCO <sub>2</sub> = 278 | 1925 years with xCO <sub>2</sub> = 278       | 1200+ years                                                                           |

| Atmospheric forcing fields and CO2                                                                              |                                                                                                                          |                                                                                                                                                     |                                                                                                                                                |                                                                                                  |                                                                                                                                           |                                                                                                                                                          |                                                                                                                                      |                                                                                                                                                    |                                                                                                         |                                                                                                                                      |
|-----------------------------------------------------------------------------------------------------------------|--------------------------------------------------------------------------------------------------------------------------|-----------------------------------------------------------------------------------------------------------------------------------------------------|------------------------------------------------------------------------------------------------------------------------------------------------|--------------------------------------------------------------------------------------------------|-------------------------------------------------------------------------------------------------------------------------------------------|----------------------------------------------------------------------------------------------------------------------------------------------------------|--------------------------------------------------------------------------------------------------------------------------------------|----------------------------------------------------------------------------------------------------------------------------------------------------|---------------------------------------------------------------------------------------------------------|--------------------------------------------------------------------------------------------------------------------------------------|
| Atmospheric forcing for (i) pre-industrial spin-up, (ii) spin-up 1850-1958 for simulation B, (iii) simulation B | looping ERA5 year 1990                                                                                                   | (i) and (ii) looping first ten years (1958-1967) of JRA55-do-v1.4 (spin-up and 1750-1939) ; (iii) looping ten years (1958-1967) of ERA5 (1940-2024) | CORE-I (normal year) forcing (i, ii, iii)                                                                                                      | OMIP climatology (i), NCEP year 1957 (ii,iii)                                                    | JRA55-do v.1.4.0 repeated year 1961 (i, ii), ERA5 hourly (iii)                                                                            | JRA55-do-v1.5.0 full reanalysis (i) cycling year 1958 (ii,iii)                                                                                           | ERA5 hourly loop over 1958-1969 (i, ii, iii)                                                                                         | (i, ii, iii): ERA5 NYF (mean of 1958-2024 with 2001 anomalies, with a temporal resolution of 3h)                                                   | JRA-3Q repeat year 1990/91 (01May1990 to 30Apr1991) (i, ii, iii)                                        | (i) 800+ years CORE spinup. 750 years with JRA55-do 1990/1991 and 250+ years of cycling ERA5 1958, (ii) and (iii) cycling ERA5 1958. |
| Atmospheric CO2 for control spin-up 1850-1958 for simulation B, and for simulation B                            | constant 278ppm; converted to pCO2 temperature formulation (Sarmiento et al., 1992)                                      | xCO2 of 278ppm, converted to pCO2 with constant sea-level pressure and water vapour pressure                                                        | xCO2 of 278ppm, converted to pCO2 with sea-level pressure and water vapour pressure                                                            | xCO2 of 278ppm, no conversion to pCO2                                                            | xCO2 of 278ppm, converted to pCO2 with sea-level pressure and water vapour pressure                                                       | xCO2 of 278 ppm, converted to pCO2 with constant sea-level pressure and water vapour pressure                                                            | xCO2 of 278ppm, converted to pCO2 with sea-level pressure and water vapour pressure                                                  | xCO2 = 278 ppm, converted to pCO2 with atmospheric pressure, and water vapour pressure                                                             | xCO2 of 278ppm, converted to pCO2 with water vapour and sea-level pressure (JRA-3Q repeat year 1990/91) | xCO2 of 278ppm, converted to pCO2 with sea-level pressure                                                                            |
| Atmospheric forcing for historical spin-up 1850-1958 for simulation A (i) and for simulation A (ii)             | 1750-1947: looping ERA5 year 1990; 1948-2023: ERA5                                                                       | (i) looping first ten years (1958-1967) of JRA55-do-v1.4 (1750-1939) ; (ii) full ERA5 reanalysis (1940-2024)                                        | CORE-I (normal year) forcing; from 1948 onwards NCEP-R1 with CORE-II corrections                                                               | NCEP 6 hourly cyclic forcing (10 years starting from 1948, i), 1948-2021: transient NCEP forcing | JRA55-do-v1.4.0 repeated year 1961 (i), ERA5 hourly (ii)                                                                                  | JRA55-do cycling year 1958 (i), JRA55-do-v1.5.0 from 1958 to 2023 (ii), JRA55-do-v1.5.0 scaled on ERA5 hourly for all scalars fields (e.g. T2m) for 2024 | ERA5 hourly loop over 1958-1969 (i), ERA5 hourly (ii)                                                                                | (i, ii): ERA5 at 3h resolution, repeat cycle 1958-2024                                                                                             | 1640-1957: repeated cycle JRA-3Q 1948-2024 (i), 1958-2024 (ii)                                          | (i) cycling ERA5 1958, (ii) ERA5 for 1958-2024.                                                                                      |
| Atmospheric CO2 for historical spin-up 1850-1958 for simulation A (i) and simulation A (ii)                     | xCO2 provided by the GCB; converted to pCO2 temperature formulation (Sarmiento et al., 1992), monthly resolution (i, ii) | xCO2 as provided by the GCB, global mean, annual resolution, converted to pCO2 with sea-level pressure and water vapour pressure (i, ii)            | xCO2 as provided by the GCB, converted to pCO2 with sea level pressure (taken from the atmospheric forcing) and water vapor correction (i, ii) | transient monthly xCO2 provided by GCB, no conversion (i, ii)                                    | xCO2 as provided by the GCB, converted to pCO2 with sea-level pressure and water vapour pressure, global mean, monthly resolution (i, ii) | xCO2 as provided by the GCB, converted to pCO2 with constant sea-level pressure and water vapour pressure, global mean, yearly resolution (i, ii)        | xCO2 as provided by GCB, converted to pCO2 with sea-level pressure and water vapour pressure, global mean, yearly resolution (i, ii) | xCO2 as provided by the GCB in 2025 (from 1780 onward), converted to pCO2 with locally determined atm. pressure, and water vapour pressure (i, ii) | xCO2 as provided by GCB, converted to pCO2 with water vapour and sea-level pressure (i, ii).            | xCO2 as provided by the GCB, converted to pCO2 with sea-level pressure                                                               |

1084  
1085  
1086  
1087  
1088  
1089  
1090  
1091  
1092  
1093  
1094  
1095  
1096  
1097

**Table S3: Description of ocean fCO<sub>2</sub>-products used for assessment of SOCEAN. See Table 4 for references.**

|                               | Jena-MLS                                                                                                                                                                                                                                             | VLIZ-SOMFFN                                                                                                                                                                                                                                                                  | CMEMS-LSCE-FFNN                                                                                                                                                                                                                           | UExp-FNN-U (previously Watson et al.)                                                                                                                                                                                                                                                                                                                                                                                                                                                                                                                                                                         | NIES-ML3                                                                                                                                                                                                                                                                                                                                                                                                                                                                                                                                                          | JMA-MLR                                                                                                                                                                                                                                                                                                                                                                    | OceanSODA-ETHZv2                                                                                                                                                                                                                                                                                                                                                                                                                                                                                                 | LDEO HPD                                                                                                                                                                                                                                                                                                                                                                                                                                                                                                                                                                                                                           | CSIR-ML6                                                                                                                                                                                                                                                                                                                                                                                                                                                                                                                                                                   |
|-------------------------------|------------------------------------------------------------------------------------------------------------------------------------------------------------------------------------------------------------------------------------------------------|------------------------------------------------------------------------------------------------------------------------------------------------------------------------------------------------------------------------------------------------------------------------------|-------------------------------------------------------------------------------------------------------------------------------------------------------------------------------------------------------------------------------------------|---------------------------------------------------------------------------------------------------------------------------------------------------------------------------------------------------------------------------------------------------------------------------------------------------------------------------------------------------------------------------------------------------------------------------------------------------------------------------------------------------------------------------------------------------------------------------------------------------------------|-------------------------------------------------------------------------------------------------------------------------------------------------------------------------------------------------------------------------------------------------------------------------------------------------------------------------------------------------------------------------------------------------------------------------------------------------------------------------------------------------------------------------------------------------------------------|----------------------------------------------------------------------------------------------------------------------------------------------------------------------------------------------------------------------------------------------------------------------------------------------------------------------------------------------------------------------------|------------------------------------------------------------------------------------------------------------------------------------------------------------------------------------------------------------------------------------------------------------------------------------------------------------------------------------------------------------------------------------------------------------------------------------------------------------------------------------------------------------------|------------------------------------------------------------------------------------------------------------------------------------------------------------------------------------------------------------------------------------------------------------------------------------------------------------------------------------------------------------------------------------------------------------------------------------------------------------------------------------------------------------------------------------------------------------------------------------------------------------------------------------|----------------------------------------------------------------------------------------------------------------------------------------------------------------------------------------------------------------------------------------------------------------------------------------------------------------------------------------------------------------------------------------------------------------------------------------------------------------------------------------------------------------------------------------------------------------------------|
| Method                        | Spatio-temporal interpolation (version oc_v2023). Spatio-temporal field of ocean-internal carbon sources/sinks is fit to the SOCATv2022 pCO <sub>2</sub> data. Includes a multi-linear regression against environmental drivers to bridge data gaps, | A feed-forward neural network (FFN) determines non-linear relationship between SOCAT pCO <sub>2</sub> measurements and environmental predictor data for 16 biogeochemical provinces (defined through a self-organizing map, SOM) and is used to fill the existing data gaps. | An ensemble of neural network models trained on 100 subsampled datasets from SOCAT and environmental predictors. The models are used to reconstruct sea surface fugacity of CO <sub>2</sub> and convert to air-sea CO <sub>2</sub> fluxes | A self-organising map feed forward neural network (SOM-FNN) implementation using SOCATv2025 recalculated to the subskin temperature (ESA CCI v3 bias corrected to surface drifter data following recommendations in Dong et al. 2022) of the ocean as measured by satellites (Goddijn-Murphy et al, 2015). Flux calculation corrected for the cool and salty surface skin. Monthly skin temperature calculated from ESA CCI v3 (Embury et al. 2024) with the cool skin difference calculated using NOAA COARE 3.5. Flux calculations completed using FluxEngine (Shutler et al., 2016; Holding et al., 2019). | The ensemble of a random forest, a gradient boost machine, and a feed forward neural network trained on SOCAT 2025 fCO <sub>2</sub> and environmental predictor variables. The interannual trend of fCO <sub>2</sub> was estimated first by the decadal trend of atmospheric CO <sub>2</sub> and then corrected by a so-called leave-one-year-out validation method. The trend was used to normalize fCO <sub>2</sub> to the mid year of 1982-2024 for model training. The monthly fCO <sub>2</sub> maps were reconstructed using model prediction and the trend. | Fields of total alkalinity (TA) were estimated by using a multiple linear regressions (MLR) method based on GLODAPv2.2023 and satellite observation data. SOCATv2025 recalculated fCO <sub>2</sub> data were converted to dissolved inorganic carbon (DIC) with the TA. Fields of DIC were estimated by using a MLR method based on the DIC and satellite observation data | OceanSODA-ETHZv2 is a two-phase machine learning approach. In phase 1, we estimate the ΔfCO <sub>2</sub> 8-day seasonal cycle climatology with a Gradient Boosted Decision Tree which is used as a predictor in the next phase. In phase 2, we predict the non-thermal component of ΔfCO <sub>2</sub> at a 8-day by 0.25° by 0.25° resolution with a two-layer fully-connected neural network using 35 ensemble members. The atmospheric CO <sub>2</sub> and non-thermal component are added back to the result. | Based on fCO <sub>2</sub> -misfit between observed fCO <sub>2</sub> and 10 global carbon budget GOBMs. The eXtreme Gradient Boosting method links this misfit to environmental observations to reconstruct the model misfit across all space and time., which is then added back to the model-based fCO <sub>2</sub> estimate. The final reconstruction of surface fCO <sub>2</sub> is the average across the 10 reconstructions. A climatology of the misfits calculated for the years 2000-2023 is used as an offset for years prior to 1982 when no/limited environmental observations are available to train the ML algorithm. | An ensemble average of six machine-learning models, where each model is constructed with a two-step clustering-regression approach to determine a non-linear relationship between SOCAT fCO <sub>2</sub> measurements and environmental proxy variables, and it used to fill the existing data gaps. The clustering step consists of two methods: the Mini-batch K-means clustering and the extended Fay and McKinley (2014) biomes. The regression step consists of three methods: Gradient Boosting Machine, Support Vector Regression, and Feed-forward Neural Network. |
| Gas-exchange parameterization | Wanninkhof 1992. Transfer coefficient k scaled to match a global mean transfer rate of 16.5 cm/hr by (Naegler, 2009)                                                                                                                                 | Wanninkhof 2014. Transfer coefficient k scaled to match a global mean transfer rate of 16.5 cm/hr (Naegler, 2009)                                                                                                                                                            | Wanninkhof 2014. Transfer coefficient k scaled to match a global mean transfer rate of 16.5 cm/hr (Naegler, 2009)                                                                                                                         | Nightingale et al 2000                                                                                                                                                                                                                                                                                                                                                                                                                                                                                                                                                                                        | Wanninkhof, 2014. Transfer coefficient k scaled to match a global mean transfer rate of 16.5 cm/hr in 1990-2019 (Fay et al., 2021)                                                                                                                                                                                                                                                                                                                                                                                                                                | Wanninkhof., 2014. Transfer coefficient k scaled to match a global mean transfer rate of 16.5 cm/hr (Naegler, 2009; Fay, Gregor et al. 2021)                                                                                                                                                                                                                               | Wanninkhof 1992, averaged and scaled for three reanalysis wind data, to a global mean 16.5 cm/hr (after Naegler 2009; Fay & Gregor et al. 2021)                                                                                                                                                                                                                                                                                                                                                                  | Wanninkhof 1992 parameterization. Transfer coefficient k scaled to match a global mean transfer rate of 16.5 cm/hr (Naegler, 2009)                                                                                                                                                                                                                                                                                                                                                                                                                                                                                                 | Wanninkhof 1992, averaged and scaled for three reanalysis wind data, to a global mean 16.5 cm/hr (after Naegler 2009; Fay & Gregor et al. 2021)                                                                                                                                                                                                                                                                                                                                                                                                                            |
| Wind product                  | JMA55-do reanalysis                                                                                                                                                                                                                                  | ERA 5                                                                                                                                                                                                                                                                        | ERA5                                                                                                                                                                                                                                      | CCMP3.1                                                                                                                                                                                                                                                                                                                                                                                                                                                                                                                                                                                                       | ERA5                                                                                                                                                                                                                                                                                                                                                                                                                                                                                                                                                              | JRA3Q                                                                                                                                                                                                                                                                                                                                                                      | ERA5                                                                                                                                                                                                                                                                                                                                                                                                                                                                                                             | ERA5                                                                                                                                                                                                                                                                                                                                                                                                                                                                                                                                                                                                                               | ERA5                                                                                                                                                                                                                                                                                                                                                                                                                                                                                                                                                                       |

|                                       |                                                                                                                                |                                                                                                                                                                                            |                                                                                                                                                                                                                                                                                                                         |                                                                                                                                                                                                                                                                                                                 |                                                                                                                                                  |                                                                                                                                                                                                                                                                                                                    |                                                                                                                                                                                                                                                                                                                                                                                                                                                                                                                                                                                                                                          |                                                                                                                                                                                                                                                                                                                                                                                                                                                                                                                                                                                                                                                                                                                                             |                                                                                                                                                                                                                                                             |
|---------------------------------------|--------------------------------------------------------------------------------------------------------------------------------|--------------------------------------------------------------------------------------------------------------------------------------------------------------------------------------------|-------------------------------------------------------------------------------------------------------------------------------------------------------------------------------------------------------------------------------------------------------------------------------------------------------------------------|-----------------------------------------------------------------------------------------------------------------------------------------------------------------------------------------------------------------------------------------------------------------------------------------------------------------|--------------------------------------------------------------------------------------------------------------------------------------------------|--------------------------------------------------------------------------------------------------------------------------------------------------------------------------------------------------------------------------------------------------------------------------------------------------------------------|------------------------------------------------------------------------------------------------------------------------------------------------------------------------------------------------------------------------------------------------------------------------------------------------------------------------------------------------------------------------------------------------------------------------------------------------------------------------------------------------------------------------------------------------------------------------------------------------------------------------------------------|---------------------------------------------------------------------------------------------------------------------------------------------------------------------------------------------------------------------------------------------------------------------------------------------------------------------------------------------------------------------------------------------------------------------------------------------------------------------------------------------------------------------------------------------------------------------------------------------------------------------------------------------------------------------------------------------------------------------------------------------|-------------------------------------------------------------------------------------------------------------------------------------------------------------------------------------------------------------------------------------------------------------|
| Spatial resolution                    | 2.5 degrees longitude x 2 degrees latitude regrided to 1x1 degree                                                              | 1x1 degree                                                                                                                                                                                 | 0.25x0.25 degree regrided to 1x1 degree                                                                                                                                                                                                                                                                                 | 1x1 degree                                                                                                                                                                                                                                                                                                      | 1x1 degree                                                                                                                                       | 1x1 degree                                                                                                                                                                                                                                                                                                         | 0.25x0.25 degree regrided to 1x1 degree                                                                                                                                                                                                                                                                                                                                                                                                                                                                                                                                                                                                  | 1x1 degree                                                                                                                                                                                                                                                                                                                                                                                                                                                                                                                                                                                                                                                                                                                                  | 1x1 degree                                                                                                                                                                                                                                                  |
| Temporal resolution                   | daily                                                                                                                          | monthly                                                                                                                                                                                    | monthly                                                                                                                                                                                                                                                                                                                 | monthly                                                                                                                                                                                                                                                                                                         | monthly                                                                                                                                          | monthly                                                                                                                                                                                                                                                                                                            | 8-daily regrided to monthly                                                                                                                                                                                                                                                                                                                                                                                                                                                                                                                                                                                                              | monthly                                                                                                                                                                                                                                                                                                                                                                                                                                                                                                                                                                                                                                                                                                                                     | monthly                                                                                                                                                                                                                                                     |
| Atmospheric CO2                       | Spatially and temporally varying field based on atmospheric CO2 data from 169 stations (Jena CarboScope atmospheric inversion) | Spatially varying 1x1 degree atmospheric pCO2_wet calculated from the NOAA ESRL marine boundary layer xCO2 and NCEP sea level pressure with the moisture correction by Dickson et al 2007. | Spatially and monthly varying fields of atmospheric pCO2 computed from CO2 mole fraction (CO2 atmospheric inversion from the Copernicus Atmosphere Monitoring Service), and atmospheric dry-air pressure which is derived from monthly surface pressure (ERA5) and water vapour pressure fitted by Weiss and Price 1980 | Atmospheric fCO2 (wet) calculated from NOAA marine boundary layer XCO2(atm) and ERA5 sea level pressure, with pH2O calculated from Cooper et al. (1998). 2024 XCO2 marine boundary values were not available at submission so we used preliminary values, estimated from 2023 values and increase at Mauna Loa. | NOAA Greenhouse Gas Marine Boundary Layer Reference. <a href="https://gml.noaa.gov/ccgg/mbl/mbl.html">https://gml.noaa.gov/ccgg/mbl/mbl.html</a> | Atmospheric xCO2 fields of JMA-GSAM inversion model (Maki et al. 2010) were converted to pCO2 by using JRA3Q sea level pressure. 2024 xCO2 fields were not available at this stage, and we used Cape Grim and Mauna Loa xCO2 increments from 2023 to 2024 for the southern and northern hemispheres, respectively. | NOAA's marine boundary layer (MBL) product (1980 - 2023) is used for atmospheric xCO2. For the year 2024, a linear regression is performed between deseasonalised Mauna Loa (1970 - 2025) and MBL data for each latitude of the latter. The mean seasonal cycle is added back to the interpolated data for 2024. The MBL xCO2 (now 1980 - 2024) is linearly interpolated onto a 0.25°x0.25° grid and resampled from weekly to 8-daily. xCO2 is multiplied by ERA5 mean sea level pressure, where the latter corrected for water vapour pressure using Dickson et al. (2007). These results are regrided to a monthly 1x1 degree pCO2atm. | NOAA's marine boundary layer (MBL) surface xCO2 product is linearly interpolated to a 1x1° monthly grid for years 1979-2023. Prior to 1979, calculating an offset between the MBL and Mauna Loa seasonal climatologic xCO2 values for a subset of common years (1979-1989) yields a mean seasonality difference which is then applied to the Mauna Loa time series. This results in a latitudinal-varying xCO2 time series for years prior to 1979, based on the long term trajectory estimated at Mauna Loa. Monthly 1x1 degree xCO2 is multiplied by ERA5 mean sea level pressure, with the correction for water vapour pressure using Dickson et al. 2007, using ERA5 SST and EN4 SSS. Finally converted to fCO2 using ERA5 SST and SLP. | NOAA's marine boundary layer product for xCO2 is linearly interpolated onto a 1x1 degree grid and resampled from weekly to monthly. ERA5 mean sea level pressure is used, where the latter corrected for water vapour pressure using Dickson et al. (2007). |
| Total ocean area on native grid (km2) | 3.63E+08                                                                                                                       | 3.63E+08                                                                                                                                                                                   | 3.50E+08                                                                                                                                                                                                                                                                                                                | 361000000                                                                                                                                                                                                                                                                                                       | 329000000                                                                                                                                        | 315000000                                                                                                                                                                                                                                                                                                          | 354615000                                                                                                                                                                                                                                                                                                                                                                                                                                                                                                                                                                                                                                | 3.586 E+8                                                                                                                                                                                                                                                                                                                                                                                                                                                                                                                                                                                                                                                                                                                                   | 363150000                                                                                                                                                                                                                                                   |

|                                                        |  |                                                                                      |  |  |  |                          |                                                        |                                                                                                                                                                                                                     |                               |
|--------------------------------------------------------|--|--------------------------------------------------------------------------------------|--|--|--|--------------------------|--------------------------------------------------------|---------------------------------------------------------------------------------------------------------------------------------------------------------------------------------------------------------------------|-------------------------------|
| method to extend product to full global ocean coverage |  | Arctic and marginal seas added following Landschützer et al. (2020). No coastal cut. |  |  |  | Fay & Gregor et al. 2021 | Coverage of the global ice free ocean (ice frac < 0.9) | Based on method in Fay & Gregor et al. 2021. Gaps were filled with monthly climatology (Landschützer et al. 2020) scaled for interannual variability based on the temporal evolution of this product for all years. | Method has near full coverage |
|--------------------------------------------------------|--|--------------------------------------------------------------------------------------|--|--|--|--------------------------|--------------------------------------------------------|---------------------------------------------------------------------------------------------------------------------------------------------------------------------------------------------------------------------|-------------------------------|

1098

**Table S4.** Comparison of the inversion set up and input fields for the atmospheric inversions. Atmospheric inversions see the full CO<sub>2</sub> fluxes, including the anthropogenic and pre-industrial fluxes. Hence they need to be adjusted for the pre-industrial flux of CO<sub>2</sub> from the land to the ocean that is part of the natural carbon cycle before they can be compared with SOCEAN and SLAND from process models. See Table 4 for references.

| Name                                   | Jena CarboScope                                                                | Carbon-Tracker Europe (CTE)                                                                    | NISMON-CO <sub>2</sub>                                                                | CT-NOAA                                                                                        | CMS-Flux                                                    | Copernicus Atmosphere Monitoring Service (CAMS) | GONGGA                                                      | COLA                                                                                                         | GCASv2                                                                        | UoE                                                                                   | MIROC-ACTM                                                                                    | NTFVAR                                                                                                                                                     | THU                                                         | NISMON-CO <sub>2</sub> _GOSAT                                              |
|----------------------------------------|--------------------------------------------------------------------------------|------------------------------------------------------------------------------------------------|---------------------------------------------------------------------------------------|------------------------------------------------------------------------------------------------|-------------------------------------------------------------|-------------------------------------------------|-------------------------------------------------------------|--------------------------------------------------------------------------------------------------------------|-------------------------------------------------------------------------------|---------------------------------------------------------------------------------------|-----------------------------------------------------------------------------------------------|------------------------------------------------------------------------------------------------------------------------------------------------------------|-------------------------------------------------------------|----------------------------------------------------------------------------|
| <b>Version number</b>                  | r76nbtEXToc_v2025                                                              | v2025                                                                                          | v2025.1                                                                               | CT2025                                                                                         | v2025                                                       | FT25r1                                          | v2025                                                       | v2025                                                                                                        | v2025                                                                         | v2025                                                                                 | v2025                                                                                         | v2025                                                                                                                                                      | v2025                                                       | v2025.1                                                                    |
| <b>Flags</b>                           |                                                                                |                                                                                                |                                                                                       |                                                                                                |                                                             |                                                 |                                                             |                                                                                                              |                                                                               |                                                                                       |                                                                                               |                                                                                                                                                            |                                                             |                                                                            |
| <b>Observations</b>                    |                                                                                |                                                                                                |                                                                                       |                                                                                                |                                                             |                                                 |                                                             |                                                                                                              |                                                                               |                                                                                       |                                                                                               |                                                                                                                                                            |                                                             |                                                                            |
| <b>Atmospheric observations (a, b)</b> | Flasks and hourly from various institutions (outliers removed by 2σ criterion) | Hourly resolution (well-mixed conditions) obspack GLOBALVIEW plus v8.0 and v10.1 and NRT_v10.1 | Hourly resolution (well-mixed conditions) obspack GLOBALVIEW plus v10.1 and NRT_v10.1 | Hourly resolution (well-mixed conditions) obspack GLOBALVIEW plus v9.1 and v10.1 and NRT_v10.1 | OCO-2 V11.2 and obspack GLOBALVIEW plus v10.1 and NRT_v10.1 | OCO-2 ACOS retrievals from NASA, v11.2          | OCO-2 v11.2r data that were scaled to the WMO 2019 standard | Hourly resolution (well-mixed conditions) obspack GLOBALVIEW plus v10.1 and NRT_v10.1. And OCO-2_b11.2_LNL G | ACOS v11.2 OCO-2 XCO <sub>2</sub> retrievals, scaled to the WMO 2019 standard | Hourly resolution (well-mixed conditions) obspack GLOBALVIEW plus v10.1 and NRT_v10.1 | Hourly resolution (well-mixed conditions) obspack GLOBALVIEW plus v10.1 and NRT_v10.1 and JMA | Hourly resolution (well-mixed conditions) obspack GLOBALVIEW plus v9.0 and v10.1 and NRT_v10.1 and GOSAT XCO <sub>2</sub> data NIES Level 2 product v03.05 | OCO-2 v11.2r data that were scaled to the WMO 2019 standard | NIES GOSAT SWIR L2 Product ver03.05 that were taken only over land (GOSAT) |
| <b>Period covered</b>                  | 1976-2024                                                                      | 2001-2024                                                                                      | 1990-2024                                                                             | 2000-2024                                                                                      | 2015-2024                                                   | 2015-2024                                       | 2015-2024                                                   | 2015-2024                                                                                                    | 2015-2024                                                                     | 2001-2024                                                                             | 2001-2024                                                                                     | 2010-2024                                                                                                                                                  | 2015-2024                                                   | 2010-2024                                                                  |
| <b>Prior fluxes</b>                    |                                                                                |                                                                                                |                                                                                       |                                                                                                |                                                             |                                                 |                                                             |                                                                                                              |                                                                               |                                                                                       |                                                                                               |                                                                                                                                                            |                                                             |                                                                            |

|                                   |                     |                            |                                              |                                     |                                                                                                     |                                                                                            |                                    |                            |                                                       |                                               |                       |                                |                                    |                                              |
|-----------------------------------|---------------------|----------------------------|----------------------------------------------|-------------------------------------|-----------------------------------------------------------------------------------------------------|--------------------------------------------------------------------------------------------|------------------------------------|----------------------------|-------------------------------------------------------|-----------------------------------------------|-----------------------|--------------------------------|------------------------------------|----------------------------------------------|
| <b>Biosphere and fires</b>        | Zero                | SiB4-MERRA and GFAS        | VISIT and GBEI                               | MiCASA v1 (includes GFEDv3)         | CARDAMOM simulated fire emissions with GFED4.1 burned area before 2024, GFAS fire emissions in 2024 | ORCHIDEE, GFEDv4.1s                                                                        | ORCHIDEE-MICT and GFEDv4.1s        | VEGAS + GFAS               | BEPS and GFED4.1s                                     | CASA v1.0, climatology after 2016 and GFED4.0 | MiCASA and GFEDv4s    | Zeng et al. 2020 and GFAS      | SiB4.2 and GFEDv4.1s               | VISIT and GBEI                               |
| <b>Ocean</b>                      | CarboScope oc_v2025 | CarboScope v2022 and v2024 | JMA global ocean mapping (Iida et al., 2021) | AOML-Extra Trees surface ocean pCO2 | ECCO-Darwin and MOM6                                                                                | CMEMS-LSCE-FFNN 2025                                                                       | Takahashi climatology with a trend | Jena OC-v2024              | JMA Ocean CO2 Map v2024 (Global) and v2025 (regional) | Takahashi climatology                         | Takahashi climatology | Zeng et al. 2022               | Takahashi climatology with a trend | JMA global ocean mapping (Iida et al., 2021) |
| <b>Fossil fuels (c)</b>           | GridFED v2025.1     | GridFED 2023.1 and 2025.1  | GridFED v2025.1                              | Miller                              | GridFED 2024.0 with an extrapolation to 2024-25 based on Carbonmonit or and NO2 retrievals          | GridFED 2024.0 with an extrapolation to 2024-25 based on Carbonmonit or and NO2 retrievals | GridFED 2025.1                     | GridFEDv2024.0 and v2025.1 | GridFEDv2025.1                                        | GridFED 2025.1                                | GridFEDv2025.1        | GridFEDv2025.1                 | GridFEDv2025.1                     | GridFED v2025.1                              |
| <b>Transport and optimization</b> |                     |                            |                                              |                                     |                                                                                                     |                                                                                            |                                    |                            |                                                       |                                               |                       |                                |                                    |                                              |
| <b>Transport model</b>            | TM3                 | TM5                        | NICAM-TM                                     | TM5                                 | GEOS-CHEM                                                                                           | LMDZ v6                                                                                    | GEOS-Chem v12.9.3                  | GEOS-CHEM v13.0.2          | MOZART-4                                              | GEOS-CHEM                                     | MIROC-ACTM            | NIES-TM-FLEXPART               | GEOS-Chem v12.2                    | NICAM-TM                                     |
| <b>Weather forcing</b>            | ERA5                | ECMWF                      | JRA-3Q                                       | ERA5                                | MERRA2                                                                                              | ECMWF                                                                                      | MERRA2                             | MERRA-2                    | GEOS5                                                 | MERRA                                         | JRA-3Q                | ERA5(NIES-TM)/JRA-55(FLEXPART) | GEOS-FP                            | JRA-3Q                                       |

|                              |                                            |                                                 |                    |                                   |              |                                            |                                                                |                                                |                        |                        |                                                                     |                                            |                        |                    |
|------------------------------|--------------------------------------------|-------------------------------------------------|--------------------|-----------------------------------|--------------|--------------------------------------------|----------------------------------------------------------------|------------------------------------------------|------------------------|------------------------|---------------------------------------------------------------------|--------------------------------------------|------------------------|--------------------|
| <b>Horizontal Resolution</b> | Global 4°x6°                               | Global 3°x2°, Europe 1°x1°, North America 1°x1° | glevel-5 (~223 km) | Global 3°x2°, North America 1°x1° | Global 4°x5° | global ~90 km in the horizontal (hexagons) | Global 2°x2.5°                                                 | 2°x2.5°                                        | 2.5°x1.875°            | Global 2°x2.5°         | 2.8°x2.8°                                                           | NIES-TM 3.75°x3.75° and FLEXPART 0.1°x0.1° | Global 4° x 5°         | glevel-5 (~223 km) |
| <b>Optimization</b>          | Conjugate gradient (re-orthonormalization) | 5-week ensemble Kalman smoother                 | Variational        | 12-week ensemble Kalman smoother  | Variational  | Variational                                | Nonlinear least squares four-dimensional variation (NLS-4DVar) | Ensemble Kalman Filter (LETKF with CEnKF/AAPO) | Ensemble Kalman filter | Ensemble Kalman filter | Bayesian inversion, similar to that of Rayner et al. (Tellus, 1999) | Variational, M1QN3                         | Ensemble Kalman filter | Variational        |

(a) Schuldt et al. 2024. Multi-laboratory compilation of atmospheric carbon dioxide data for the period 1957-2023; obspack\_co2\_1\_test\_GLOBALVIEWplus\_v10.1\_2024-11-13; NOAA Earth System Research Laboratory, Global Monitoring Laboratory. <http://doi.org/10.25925/20241101>

(b) Schuldt et al. 2025. Multi-laboratory compilation of atmospheric carbon dioxide data for the period 2024; obspack\_co2\_1\_NRT\_v10.1\_2025-02-07; NOAA Earth System Research Laboratory, Global Monitoring Laboratory. <http://doi.org/10.25925/20250101>.

(c) GCP-GridFED v2025.1 and earlier (Jones et al., 2025) are updates of the GCP-GridFED dataset presented by Jones et al. (2021b).

1101

1102

1103

| <b>Table S5: Overview of the Earth System Models (ESMs) and the simulations.</b> |                                                                                                                                                                                                                                                                                                                 |                                        |                         |                                                                                                        |                                                                                                                                              |                       |
|----------------------------------------------------------------------------------|-----------------------------------------------------------------------------------------------------------------------------------------------------------------------------------------------------------------------------------------------------------------------------------------------------------------|----------------------------------------|-------------------------|--------------------------------------------------------------------------------------------------------|----------------------------------------------------------------------------------------------------------------------------------------------|-----------------------|
| Model                                                                            | CanESM5                                                                                                                                                                                                                                                                                                         | EC-Earth3-CC                           | IPSL-CM6A-CO2-LR        | MIROC-ES2L                                                                                             | MPI-ESM1.2-LR                                                                                                                                | NorCPM-CC             |
| Resolution<br>Atmosphere                                                         | T63, 49 hybrid levels up to 1hPa                                                                                                                                                                                                                                                                                | T255, 91 levels                        | 2.5°x1.25°, 79 levels   | T42, 40 levels                                                                                         | T63, 47 levels                                                                                                                               | 2.5x1.875°, 32 levels |
| Resolution<br>Ocean                                                              | 1° refined meridionally to 1/3° near Equator, 45 levels                                                                                                                                                                                                                                                         | 1°, 75 levels                          | 1° (nominal), 75 levels | Tripolar (~1°), 62 levels                                                                              | 1.5°, 40 levels                                                                                                                              | 1°, 53 sigma levels   |
| Assimilation<br>Atmosphere                                                       | ERA-Interim (Dee et al. 2011) from 1980 to 2018 and ERA5 (Hersbach et al. 2020) afterwards: full-field nudging of temperature, horizontal wind and specific humidity. Globally averaged atmospheric CO2 concentration at the lowest model level is constrained by prescribed values (Arora and Scinocca, 2016). | ERA5 (Hersbach et al. 2020) full-field | None                    | 3D full field wind and T of JRA55 (Kobayashi et al. 2015) with the simplified IAU (Tatebe et al. 2012) | ERA-40 (Uppala et al. 2005) before 1979 and ERA5 (Hersbach et al. 2020) from 1980: Vorticity, divergence, log(p), T; full field with nudging | None                  |

|                          |                                                                                                                                                                                                                                                                                                                                                                                                                                                                                                                                                                                                                                                             |                                                                                                                                                                                                |                                                                                                                                   |                                                                                                                                                   |                                                                                                  |                                                                                                                                               |
|--------------------------|-------------------------------------------------------------------------------------------------------------------------------------------------------------------------------------------------------------------------------------------------------------------------------------------------------------------------------------------------------------------------------------------------------------------------------------------------------------------------------------------------------------------------------------------------------------------------------------------------------------------------------------------------------------|------------------------------------------------------------------------------------------------------------------------------------------------------------------------------------------------|-----------------------------------------------------------------------------------------------------------------------------------|---------------------------------------------------------------------------------------------------------------------------------------------------|--------------------------------------------------------------------------------------------------|-----------------------------------------------------------------------------------------------------------------------------------------------|
| Assimilation Ocean       | Nudging to 3D potential temperature and salinity from ORAS5 reanalysis (Zuo et al. 2019). Sea surface temperature relaxed to interpolated values from NOAA's OISSTv2 from Nov. 1981 to present, and NOAA's ERSSTv3 prior (Smith et al. 2008).                                                                                                                                                                                                                                                                                                                                                                                                               | EN4 (Good et al. 2013) 3D nudging T and S with weaker nudging band around equator. SST and SSS restoring to ORAS5 (Zuo et al. 2019). Atmospheric forcing: DFS5.2 1958-1979 and ERA5 after 1980 | Nudging towards SST (ERSSTv5) and SSS (EN4) using a restoring coefficient dependent on the mixed layer depth (Ortega et al. 2017) | 3D full field T, S, and sea-ice concentration of an ocean objective analysis (Ishii and Kimoto 2009) with the simplified IAU (Tatebe et al. 2012) | EN4 (Good et al. 2013) 3D full field T and S with ensemble Kalman filter (Brune et al. 2018)     | ENKF anomaly assimilation of monthly T and S from EN4, monthly SST from HADISST during 1975-1981, and daily SST from OISSTv2 during 1982-2023 |
| Assimilation Land        | Indirectly through response of CLASS-CTEM to the data-constrained coupled ESM                                                                                                                                                                                                                                                                                                                                                                                                                                                                                                                                                                               | LPJ-GUESS forced offline with ERA5 1979-2020 after preindustrial spinup+transient up to 1979                                                                                                   | None                                                                                                                              | None                                                                                                                                              | Indirectly initialized by atmospheric and oceanic data assimilation within the fully coupled ESM | None                                                                                                                                          |
| Ensemble Size            | 10                                                                                                                                                                                                                                                                                                                                                                                                                                                                                                                                                                                                                                                          | 10                                                                                                                                                                                             | 10                                                                                                                                | 10                                                                                                                                                | 10                                                                                               | 10                                                                                                                                            |
| Period of reconstruction | 1960-2024                                                                                                                                                                                                                                                                                                                                                                                                                                                                                                                                                                                                                                                   | 1980-2024                                                                                                                                                                                      | 1960-2024                                                                                                                         | 1960-2024                                                                                                                                         | 1960-2024                                                                                        | 1975-2024                                                                                                                                     |
| Hindcasts and forecasts  | 1 year starting from Jan. 1st 1980-2025                                                                                                                                                                                                                                                                                                                                                                                                                                                                                                                                                                                                                     | 14 months starting from Nov. 1st 1980-2024                                                                                                                                                     | 1 year starting from Jan. 1st 1981-2025                                                                                           | 14 months starting from Nov. 1st 1980-2024                                                                                                        | 14 months starting from Nov. 1st 1980-2024                                                       | 16 months starting from Nov. 1st 1980-2024                                                                                                    |
| External forcings        | The Coupled Model Intercomparison Project Phase 6 (CMIP6) historical (1960-2014) plus SSP2-4.5 baseline and CovidMIP two year blip scenario (after 2015) (Eyring et al. 2016; Lamboll et al. 2021). The CO2 emissions forcing from 2015 onward are substituted by GCP-GridFED (v2024.0, Jones et al., 2025), which is an update to Jones et al. (2021) , for all the models except for IPSL-CM6A-CO2-LR. The CO2 emissions forcing for year 2025 is an extension with the same emission of the year 2024. Note the difference in global integrated CO2 emissions between CMIP6 CovidMIP and GCP-GridFED in recent years is within the emission uncertainty. |                                                                                                                                                                                                |                                                                                                                                   |                                                                                                                                                   |                                                                                                  |                                                                                                                                               |

|            |                                                       |                                                                          |                     |                      |                                          |                                             |
|------------|-------------------------------------------------------|--------------------------------------------------------------------------|---------------------|----------------------|------------------------------------------|---------------------------------------------|
| References | Swart et al. 2019;<br>Sospedra-Alfonso et al.<br>2021 | Döscher et al. 2021;<br>Bilbao et al., 2021;<br>Bernardello et al., 2024 | Boucher et al. 2020 | Watanabe et al. 2020 | Mauritsen et al. 2019; Li<br>et al. 2023 | Tjiputra et al. 2020;<br>Bethke et al. 2021 |
|------------|-------------------------------------------------------|--------------------------------------------------------------------------|---------------------|----------------------|------------------------------------------|---------------------------------------------|

1105

1106

1107

Table S6. Comparison of the projection with realised fossil CO<sub>2</sub> emissions (EFOS). The 'Actual' values are first the estimate available using actual data (e.g., the actual 2020 value is from the 2021 budget) and the 'Projected' values refers to estimates made before the end of the year for each publication (e.g., the projected 2020 value is from the 2020 budget). Projections based on a different method from that described here during 2008-2014 are available in Le Quéré et al., (2016). All values are adjusted for leap years.

|          | World          |        | China          |        | USA            |        | EU28 / EU27 (i) |        | India          |        | Rest of World (ii) |        |
|----------|----------------|--------|----------------|--------|----------------|--------|-----------------|--------|----------------|--------|--------------------|--------|
|          | Projected      | Actual | Projected      | Actual | Projected      | Actual | Projected       | Actual | Projected      | Actual | Projected          | Actual |
| 2015 (a) | -0.6%          | 0.06%  | -3.9%          | -0.7%  | -1.5%          | -2.5%  | -               | -      | -              | -      | 1.2%               | 1.2%   |
|          | (-1.6 to 0.5)  |        | (-4.6 to -1.1) |        | (-5.5 to 0.3)  |        | (-0.2 to 2.6)   |        |                |        |                    |        |
| 2016 (b) | -0.2%          | 0.20%  | -0.5%          | -0.3%  | -1.7%          | -2.1%  | -               | -      | -              | -      | 1.0%               | 1.3%   |
|          | (-1.0 to +1.8) |        | (-3.8 to +1.3) |        | (-4.0 to +0.6) |        | (-0.4 to +2.5)  |        |                |        |                    |        |
| 2017 (c) | 2.0%           | 1.6%   | 3.5%           | 1.5%   | -0.4%          | -0.5%  | -               | -      | 2.00%          | 3.9%   | 1.6%               | 1.9%   |
|          | (+0.8 to +3.0) |        | (+0.7 to +5.4) |        | (-2.7 to +1.0) |        | (0.0 to +3.2)   |        |                |        |                    |        |
| 2018 (d) | 2.7%           | 2.1%   | 4.7%           | 2.3%   | 2.5%           | 2.8%   | -0.7%           | -2.1%  | 6.3%           | 8.0%   | 1.8%               | 1.7%   |
|          | (+1.8 to +3.7) |        | (+2.0 to +7.4) |        | (+0.5 to +4.5) |        | (-2.6 to +1.3)  |        | (+4.3 to +8.3) |        | (+0.5 to +3.0)     |        |
| 2019 (e) | 0.5%           | 0.1%   | 2.6%           | 2.2%   | -2.4%          | -2.6%  | -1.7%           | -4.3%  | 1.8%           | 1.0%   | 0.5%               | 0.5%   |
|          | (-0.3 to +1.4) |        | (+0.7 to +4.4) |        | (-4.7 to -0.1) |        | (-5.1 to +1.8%) |        | (-0.7 to +3.7) |        | (-0.8 to +1.8)     |        |
| 2020 (f) | -6.7%          | -5.4%  | -1.7%          | 1.4%   | -12.2%         | -10.6% | -11.3% (EU27)   | -10.9% | -9.1%          | -7.3%  | -7.4%              | -7.0%  |
|          |                |        |                |        |                |        |                 |        |                |        |                    |        |

|                 |                 |       |                  |       |                 |        |                  |        |                  |       |                 |       |
|-----------------|-----------------|-------|------------------|-------|-----------------|--------|------------------|--------|------------------|-------|-----------------|-------|
| 2021 (g)        | 4.8%            | 5.1%  | 4.3%             | 3.5%  | 6.8%            | 6.2%   | 6.3%             | 6.8%   | 11.2%            | 11.1% | 3.2%            | 4.5%  |
|                 | (4.2% to 5.4%)  |       | (3.0% to 5.4%)   |       | (6.6% to 7.0%)  |        | (4.3% to 8.3%)   |        | (10.7% to 11.7%) |       | (2.0% to 4.3%)  |       |
| 2022 (h)        | 1.1%            | 0.9%  | -1.5%            | 0.9%  | 1.6%            | 1.0%   | -1.0%            | -1.9%  | 5.6%             | 5.8%  | 2.5%            | 0.6%  |
|                 | (0% to 1.7%)    |       | (-3.0% to 0.1%)  |       | (-0.9% to 4.1%) |        | (-2.9% to 1.0%)  |        | (3.5% to 7.7%)   |       | (0.1% to 2.3%)  |       |
| 2023 (j)        | 1.1%            | 1.3%  | 4.0%             | 4.9%  | -3.0%           | -3.3%  | -7.4%            | -8.4%  | 8.2%             | 8.2%  | 0.4%            | 0.7%  |
|                 | (0.0% to 2.1%)  |       | (1.9% to 6.1%)   |       | (-5% to -1%)    |        | (-9.9% to -4.9%) |        | (6.7% to 9.7%)   |       | (-1.4% to 2.3%) |       |
| 2024 (k)<br>GCB | 0.80%           | 1.10% | 0.10%            | 0.70% | -0.90%          | -0.60% | -2.80%           | -2.60% | 3.70%            | 4.00% | 1.20%           | 1.90% |
|                 | (-0.2% to 1.7%) |       | (-1.7% to 1.9%)  |       | (-2.1% to 0.3%) |        | (-5.2% to -0.3%) |        | (3.3% to 4.0%)   |       | (0.7% to 3.2%)  |       |
| 2024 (k)<br>CM  | 0.80%           | 1.10% | -0.80%           | 0.70% | 1.30%           | -0.60% | -4.50%           | -2.60% | 5.00%            | 4.00% | 1.50%           | 1.90% |
|                 | (0.5% to 1.1%)  |       | (-1.3% to -0.4%) |       | (1.1% to 1.6%)  |        | (-5.4% to -3.6%) |        | (4.4% to 5.5%)   |       | (-1.2% to 1.8%) |       |

(a) Jackson et al. (2016) and Le Quéré et al. (2015a). (b) Le Quéré et al. (2016). (c) Le Quéré et al. (2018a). (d) Le Quéré et al. (2018b). (e) Friedlingstein et al., (2019), (f) Friedlingstein et al., (2020), (g) Friedlingstein et al., (2022a), (h) Friedlingstein et al., (2022b), (j) Friedlingstein et al., (2023), (k) Friedlingstein et al. (2025a), (l) This study

(i) EU28 until 2019, EU27 from 2020

(ii) From 2023, the projection for Rest of World is composed of separate projections for aviation bunkers, maritime bunkers, and all other countries.

(iii) The projection for the World includes the projection on cement carbonation

1109 Table S7 Comparison of the current year projection of GATM, SLAND and SOCEAN for the current year with the  
 1110 actual values since GCB2021. The ‘actual’ values are the estimate available using observations and  
 1111 comprehensive models/data streams (e.g., the actual 2023 value from the 2024 GCB budget publication) and  
 1112 the ‘projected’ values refers to estimates made before the end of the year for each publication (e.g., the  
 1113 projected 2024 value from the 2024 GCB budget publication). All units in GtC yr<sup>-1</sup>.  
 1114

|             | GATM      |           | SOCEAN    |           | SLAND     |           |
|-------------|-----------|-----------|-----------|-----------|-----------|-----------|
|             | Projected | Actual    | Projected | Actual    | Projected | Actual    |
| <b>2021</b> | 5.3 ± 0.1 | 5.2 ± 0.2 | 2.9 ± 0.4 | 2.9 ± 0.4 | 3.3 ± 1.0 | 3.5 ± 0.9 |
| <b>2022</b> | 5.3 ± 0.4 | 4.6 ± 0.2 | 2.9 ± 0.4 | 2.8 ± 0.4 | 3.4 ± 0.9 | 3.8 ± 0.8 |
| <b>2023</b> | 5.1 ± 0.4 | 5.9 ± 0.2 | 2.9 ± 0.6 | 2.9 ± 0.4 | 2.9 ± 1.2 | 2.3 ± 1.0 |
| <b>2024</b> | 6.1 ± 0.3 | 7.9 ± 0.2 | 3.0 ± 0.6 | 3.4 ± 0.6 | 3.2 ± 1.5 | 1.9 ± 0.9 |

1115 Note: the 2024 projections of SOCEAN and SLAND are not corrected as in the GCB2024, while the actual  
 1116 estimates are corrected, as in the present GCB2025. The uncorrected 2024 estimates of SOCEAN and SLAND  
 1117 are 3.2 ± 0.6 and 2.5 ± 0.9 GtC yr<sup>-1</sup> respectively.  
 1118

**Table S8 Attribution of fCO<sub>2</sub> measurements for the year 2024 included in SOCATv2025 (Bakker et al., 2016, 2025) to inform ocean fCO<sub>2</sub>-based data products.**

| Platform Name               | Regions                                                            | No. of measurements | Principal Investigators                                                                                                  | No. of datasets | Platform Type |
|-----------------------------|--------------------------------------------------------------------|---------------------|--------------------------------------------------------------------------------------------------------------------------|-----------------|---------------|
| Allure of the Seas          | Coastal                                                            | 3,065               | Wanninkhof, R.; Pierrot, D.                                                                                              | 1               | Ship          |
| Arni Fridriksson            | Arctic, North Atlantic, coastal                                    | 23,030              | Benoit-Cattin, A.                                                                                                        | 3               | Ship          |
| Atlantic Explorer           | North Atlantic, Tropical Atlantic, coastal                         | 38,394              | Bates, N. R.; Enright, M.                                                                                                | 23              | Ship          |
| Bell M. Shimada             | Coastal                                                            | 32,166              | Alin, S. R.; Feeley, R. A.                                                                                               | 6               | Ship          |
| CCE1_122W_33N               | Coastal                                                            | 432                 | Sutton, A.; Send, U.; Ohman, M.                                                                                          | 1               | Mooring       |
| CCE2_121W_34N               | Coastal                                                            | 703                 | Sutton, A.; Send, U.; Ohman, M.                                                                                          | 1               | Mooring       |
| Celtic Explorer             | Arctic, North Atlantic, coastal                                    | 49,799              | Cronin, M.                                                                                                               | 5               | Ship          |
| Equinox                     | North Atlantic, Tropical Atlantic, coastal                         | 2,125               | Wanninkhof, R.; Pierrot, D.                                                                                              | 2               | Ship          |
| F.G. Walton Smith           | Coastal                                                            | 28,714              | Barbero, L.; Pierrot, D.; Wanninkhof, R.                                                                                 | 15              | Ship          |
| Finnmaid                    | Coastal                                                            | 287,640             | Rehder, G.; Bittig, H.; Glockzin, M.                                                                                     | 11              | Ship          |
| G.O. Sars                   | Arctic, North Atlantic, coastal                                    | 116,122             | Skjelvan, I.                                                                                                             | 16              | Ship          |
| GAKOA_149W_60N              | Coastal                                                            | 487                 | Monacci, N.; Alin, S. R.; Battisti, R.; Bott, R.; Cross, J.; Maenner-Jones, S.; Musielewicz, S.; Osborne, J.; Sutton, A. | 1               | Mooring       |
| Gordon Gunter               | North Atlantic, Tropical Atlantic, coastal                         | 50,247              | Wanninkhof, R.; Pierrot, D.                                                                                              | 9               | Ship          |
| Healy                       | Arctic, North Pacific, coastal                                     | 16,900              | Sweeney, C.; Newberger, T.; McAuliffe, A. M.; Munro, D. R.                                                               | 2               | Ship          |
| Henry B. Bigelow            | Coastal                                                            | 72,468              | Wanninkhof, R.; Pierrot, D.                                                                                              | 10              | Ship          |
| Heron Island                | Coastal                                                            | 1,128               | Tilbrook, B.                                                                                                             | 1               | Mooring       |
| Investigator                | Southern Ocean                                                     | 81,717              | Tilbrook, B.; Akl, J.; Neill, C.                                                                                         | 3               | Ship          |
| Kangaroo Island             | Southern Ocean                                                     | 1,343               | Tilbrook, B.                                                                                                             | 1               | Mooring       |
| Keifu Maru II               | North Pacific, Tropical Pacific, coastal                           | 7,155               | Enyo, K.                                                                                                                 | 6               | Ship          |
| Laurence M. Gould           | Southern Ocean                                                     | 12,899              | Sweeney, C.; Newberger, T.; Sutherland, S. C.; Munro, D. R.                                                              | 2               | Ship          |
| Le Commandant Charcot       | Arctic, North Atlantic, Tropical Atlantic, Southern Ocean, coastal | 35,750              | Wanninkhof, R.; Pierrot, D.                                                                                              | 10              | Ship          |
| M2_164W_57N                 | Coastal                                                            | 552                 | Monacci, N.; Sutton, A.                                                                                                  | 2               | Mooring       |
| Maria Island                | Southern Ocean                                                     | 1,236               | Tilbrook, B.                                                                                                             | 1               | Mooring       |
| Marion Dufresne             | Indian, Southern Ocean                                             | 9,559               | Lo Monaco, C.; Metzl, N.                                                                                                 | 1               | Ship          |
| MV Oleander                 | North Atlantic, coastal                                            | 34,322              | Bates, N. R.; Enright, M.                                                                                                | 7               | Ship          |
| Nathaniel B. Palmer         | Southern Ocean                                                     | 42,354              | Sweeney, C.; Newberger, T.; McAuliffe, A. M.; Munro, D. R.                                                               | 6               | Ship          |
| New Century 2               | North Pacific, Tropical Pacific, Southern Ocean, coastal           | 252,956             | Nakaoka, S.-I.; Takao, S.                                                                                                | 14              | Ship          |
| NG Islander 2               | Tropical Pacific                                                   | 55,333              | Wanninkhof, R.; Pierrot, D.                                                                                              | 15              | Ship          |
| Oshoro Maru V               | North Pacific, coastal                                             | 4,275               | Takafumi, A.; Nakaoka, S.-I.                                                                                             | 6               | Ship          |
| Papa_145W_50N               | North Pacific                                                      | 1,711               | Sutton, A.; Cronin, M.; Emerson, S.                                                                                      | 1               | Mooring       |
| Quadra Island Field Station | Coastal                                                            | 81,629              | Evans, W.                                                                                                                | 1               | Mooring       |

|                    |                                                          |         |                                                      |    |         |
|--------------------|----------------------------------------------------------|---------|------------------------------------------------------|----|---------|
| RV Neil Armstrong  | North Atlantic, coastal                                  | 10,376  | Theetaert, H.; Azetsu-Scott, K.; Pierrot, D.         | 2  | Ship    |
| RV Skagerak        | Arctic, coastal                                          | 13,572  | Leseurre, C.                                         | 1  | Ship    |
| Sea-Cargo Express  | Coastal                                                  | 52,931  | Omar, A.; Kritensen, T. O.                           | 5  | Ship    |
| Sikuliaq           | Arctic, North Pacific, Tropical Pacific, coastal         | 64,663  | Sweeney, C.; Newberger, T.; Munro, D. R.; Fay A. R.  | 18 | Ship    |
| Simon Stevin       | Coastal                                                  | 52,878  | Gkritzalis, T.; Theetaert, H.; T'Jampens, M.         | 7  | Ship    |
| SOFS_142E_46S      | Southern Ocean                                           | 775     | Sutton, A.; Trull, T.                                | 1  | Mooring |
| Tangaroa           | Tropical Pacific, Southern Ocean                         | 145,095 | Van de Velde, S.; Currie, K. I.                      | 11 | Ship    |
| TAO170W_0N         | Tropical Pacific                                         | 631     | Sutton, A.                                           | 1  | Mooring |
| Thomas G. Thompson | Tropical Pacific, Indian, Southern Ocean, coastal        | 18,058  | Alin, S.R.; Feeley, R. A.                            | 4  | Ship    |
| Trans Future 5     | North Pacific, Tropical Pacific, Southern Ocean, coastal | 200,905 | Nakaoka, S.-I.; Takao, S.; Nojiri, Y.                | 16 | Ship    |
| Tukuma Arctica     | North Atlantic, coastal                                  | 37,839  | Becker, M.; Olsen, A.                                | 14 | Ship    |
| Victor Angelescu   | Southern Ocean                                           | 46,031  | Berghoff, C., Arbilla, L., Veccia, M., Maenza, R. A. | 5  | Ship    |
| WHOTS_158W_23N     | Tropical Pacific                                         | 1,258   | Sutton, A., Weller, R., Pleuddemann, A.              | 1  | Mooring |

1120  
1121

**Table S9.** Aircraft measurement programs archived by Cooperative Global Atmospheric Data Integration Project (Schuldt et al. 2024 and 2025) that contribute to the evaluation of the atmospheric inversions (Figure S13).

| Site code   | Measurement program name in Obspack                                      | Specific doi                                                                                      | Data providers                                                                                                                                                                                                                                                                                                                                                           |
|-------------|--------------------------------------------------------------------------|---------------------------------------------------------------------------------------------------|--------------------------------------------------------------------------------------------------------------------------------------------------------------------------------------------------------------------------------------------------------------------------------------------------------------------------------------------------------------------------|
| AAO         | Airborne Aerosol Observatory, Bondville, Illinois                        | <a href="https://doi.org/10.15138/39HR-9N34">https://doi.org/10.15138/39HR-9N34</a>               | Sweeney, C.;                                                                                                                                                                                                                                                                                                                                                             |
| ABOVE       | Carbon in Arctic Reservoirs Vulnerability Experiment (CARVE)             | <a href="https://doi.org/10.3334/ORN LDAAC/1404">https://doi.org/10.3334/ORN LDAAC/1404</a>       | Sweeney, C.; McKain, K.; Karion, A.; Miller, J.B.; Miller, C.E.                                                                                                                                                                                                                                                                                                          |
| ACG         | Alaska Coast Guard                                                       | <a href="https://doi.org/10.15138/39HR-9N34">https://doi.org/10.15138/39HR-9N34</a>               | McKain, K.; Karion, A.; Sweeney, C.                                                                                                                                                                                                                                                                                                                                      |
| ACT         | Atmospheric Carbon and Transport - America                               | <a href="https://doi.org/10.3334/ORN LDAAC/1593">https://doi.org/10.3334/ORN LDAAC/1593</a>       | Sweeney, C.; Baier, B; Davis, K.                                                                                                                                                                                                                                                                                                                                         |
| AIRCORENOAA | NOAA AirCore                                                             | <a href="https://doi.org/10.15138/6AV0-MY81">https://doi.org/10.15138/6AV0-MY81</a>               | Sweeney, C.; Baier, B.                                                                                                                                                                                                                                                                                                                                                   |
| AJAX        | Alpha Jet Atmospheric eXperiment (AJAX)                                  | <a href="https://doi.org/10.5194/essd-15-2375-2023">https://doi.org/10.5194/essd-15-2375-2023</a> | Emma L. Yates (NASA-Ames) AND Laura T. Iraci (NASA-Ames) AND Susan S. Kulawik (NASA-Ames) AND Ju-Mee Ryoo (NASA-Ames) AND Josette E. Marrero (NASA-Ames) AND Caroline L. Parworth (NASA-Ames) AND Jason M. St.Clair (NASA-GSFC) AND Thomas F. Hanisco (NASA-GSFC) AND Thao Paul V. Bui (NASA-Ames) AND Cecilia S. Chang (NASA-Ames) AND Jonathan M. Dean-Day (NASA-Ames) |
| ALF         | Alta Floresta                                                            | <a href="https://doi.org/10.1594/PAN GAEA.949643">https://doi.org/10.1594/PAN GAEA.949643</a>     | Gatti, L.V.; Gloor, E.; Miller, J.B.; Peters, W.                                                                                                                                                                                                                                                                                                                         |
| AOA         | Aircraft Observation of Atmospheric trace gases by JMA                   | doi:10.5194/amt-6-1257-2013                                                                       | Shinya Takatsuji                                                                                                                                                                                                                                                                                                                                                         |
| BGI         | Bradgate, Iowa                                                           | <a href="https://doi.org/10.15138/39HR-9N34">https://doi.org/10.15138/39HR-9N34</a>               | Sweeney, C.;                                                                                                                                                                                                                                                                                                                                                             |
| BNE         | Beaver Crossing, Nebraska                                                | <a href="https://doi.org/10.15138/39HR-9N34">https://doi.org/10.15138/39HR-9N34</a>               | Sweeney, C.;                                                                                                                                                                                                                                                                                                                                                             |
| BRZ         | Berezorechka, Russia                                                     |                                                                                                   | Motoki Sasakawa, Toshinobu Machida                                                                                                                                                                                                                                                                                                                                       |
| CAR         | Briggsdale, Colorado                                                     | <a href="https://doi.org/10.15138/39HR-9N34">https://doi.org/10.15138/39HR-9N34</a>               | McKain, K.; Sweeney, C.                                                                                                                                                                                                                                                                                                                                                  |
| CMA         | Cape May, New Jersey                                                     | <a href="https://doi.org/10.15138/39HR-9N34">https://doi.org/10.15138/39HR-9N34</a>               | McKain, K.; Sweeney, C.                                                                                                                                                                                                                                                                                                                                                  |
| CON         | CONTRAIL (Comprehensive Observation Network for TRace gases by AirLiner) | http://dx.doi.org/10.17595/20180208.001                                                           | Toshinobu Machida (NIES) AND Hidekazu Matsueda (MRI) AND Yosuke Niwa (NIES) AND Motoki Sasakawa (NIES)                                                                                                                                                                                                                                                                   |
| CRV         | Carbon in Arctic Reservoirs Vulnerability Experiment (CARVE)             | <a href="https://doi.org/10.3334/ORN LDAAC/1404">https://doi.org/10.3334/ORN LDAAC/1404</a>       | Sweeney, C.; Karion, A.; Miller, J.B.; Miller, C.E.                                                                                                                                                                                                                                                                                                                      |
| DND         | Dahlen, North Dakota                                                     | <a href="https://doi.org/10.15138/39HR-9N34">https://doi.org/10.15138/39HR-9N34</a>               | McKain, K.; Sweeney, C.                                                                                                                                                                                                                                                                                                                                                  |
| ECO         | East Coast Outflow                                                       | <a href="https://doi.org/10.1029/2019GL082635">https://doi.org/10.1029/2019GL082635</a>           | Sweeney, C.; McKain, K.                                                                                                                                                                                                                                                                                                                                                  |
| ESP         | Estevan Point, British Columbia                                          | <a href="https://doi.org/10.15138/39HR-9N34">https://doi.org/10.15138/39HR-9N34</a>               | McKain, K.; Sweeney, C.                                                                                                                                                                                                                                                                                                                                                  |
| ETL         | East Trout Lake, Saskatchewan                                            | <a href="https://doi.org/10.15138/39HR-9N34">https://doi.org/10.15138/39HR-9N34</a>               | McKain, K.; Sweeney, C.                                                                                                                                                                                                                                                                                                                                                  |
| FAM         | FAAM Aircraft, UK                                                        |                                                                                                   | Xin Lan                                                                                                                                                                                                                                                                                                                                                                  |
| FWI         | Fairchild, Wisconsin                                                     | <a href="https://doi.org/10.15138/39HR-9N34">https://doi.org/10.15138/39HR-9N34</a>               | Sweeney, C.;                                                                                                                                                                                                                                                                                                                                                             |
| GSFC        | NASA Goddard Space Flight Center Aircraft Campaign                       |                                                                                                   | Kawa, S.R.; Abshire, J.B.; Riris, H.                                                                                                                                                                                                                                                                                                                                     |
| HAA         | Molokai Island, Hawaii                                                   | <a href="https://doi.org/10.15138/39HR-9N34">https://doi.org/10.15138/39HR-9N34</a>               | Sweeney, C.;                                                                                                                                                                                                                                                                                                                                                             |
| HFM         | Harvard University Aircraft Campaign                                     | doi:10.1002/2014JD022591                                                                          | Sweeney, C.;                                                                                                                                                                                                                                                                                                                                                             |
| HIL         | Homer, Illinois                                                          | <a href="https://doi.org/10.15138/39HR-9N34">https://doi.org/10.15138/39HR-9N34</a>               | McKain, K.; Sweeney, C.                                                                                                                                                                                                                                                                                                                                                  |

|               |                                                           |                                                                                               |                                                                                                                     |
|---------------|-----------------------------------------------------------|-----------------------------------------------------------------------------------------------|---------------------------------------------------------------------------------------------------------------------|
| HIP           | HIPPO (HIAPER Pole-to-Pole Observations)                  | <a href="https://doi.org/10.3334/CDIAC/HIPPO_010">https://doi.org/10.3334/CDIAC/HIPPO_010</a> | Wofsy, S.C.; Stephens, B.B.; Elkins, J.W.; Hints, E.J.; Moore, F.                                                   |
| IAGOS-CARIBIC | In-service Aircraft for a Global Observing System         | <a href="https://doi.org/10.5281/zenodo.10495597">https://doi.org/10.5281/zenodo.10495597</a> | Obersteiner, F.; Boenisch, H.; Gehrlein, T.; Zahn, A.; Gerbig, C.; Schuck, T.                                       |
| IAGOS-CORE    | In-service Aircraft for a Global Observing System         |                                                                                               | Christoph Gerbig (Max-Planck-Institut für Biogeochemie, Jena)                                                       |
| SONGNEX2015   | Shale Oil and Natural Gas Nexus 2015 (air campaign)       |                                                                                               | Thomas Ryerson (NOAA) AND Jeff Peischl (NOAA) AND Ken Aikin (NOAA)                                                  |
| INX           | INFLUX (Indianapolis Flux Experiment)                     | doi:10.1002/2014JD022591                                                                      | Sweeney, C.; Shepson, P.B.; Turnbull, J.                                                                            |
| LEF           | Park Falls, Wisconsin                                     | <a href="https://doi.org/10.15138/39HR-9N34">https://doi.org/10.15138/39HR-9N34</a>           | McKain, K.; Sweeney, C.                                                                                             |
| MAN           | Manaus, Brazil                                            |                                                                                               | Miller, J.B.; Martins, G.A.; de Souza, R.A.F.                                                                       |
| NHA           | Offshore Portsmouth, New Hampshire (Isles of Shoals)      | <a href="https://doi.org/10.15138/39HR-9N34">https://doi.org/10.15138/39HR-9N34</a>           | McKain, K.; Sweeney, C.                                                                                             |
| NSA           | North Slope, Alaska                                       | doi:10.1002/2014JD022591                                                                      | McKain, K.; Sweeney, C.; Biraud, S.C.                                                                               |
| OIL           | Oglesby, Illinois                                         | <a href="https://doi.org/10.15138/39HR-9N34">https://doi.org/10.15138/39HR-9N34</a>           | Sweeney, C.;                                                                                                        |
| ORC           | ORCAS (O2/N2 Ratio and CO2 Airborne Southern Ocean Study) | <a href="https://doi.org/10.5065/D6SB445X">https://doi.org/10.5065/D6SB445X</a>               | Stephens, B.B, Sweeney, C., McKain, K., Kort, E.                                                                    |
| PFA           | Poker Flat, Alaska                                        | <a href="https://doi.org/10.15138/39HR-9N34">https://doi.org/10.15138/39HR-9N34</a>           | McKain, K.; Sweeney, C.                                                                                             |
| RBA-B         | Rio Branco                                                | <a href="https://doi.org/10.1594/PANGAEA.949643">https://doi.org/10.1594/PANGAEA.949643</a>   | Gatti, L.V.; Gloor, E.; Miller, J.B.; Peters, W.                                                                    |
| RTA           | Rarotonga                                                 | <a href="https://doi.org/10.15138/39HR-9N34">https://doi.org/10.15138/39HR-9N34</a>           | McKain, K.; Sweeney, C.                                                                                             |
| TOM           | Atmospheric Tomography Mission (ATom)                     | doi:10.5067/Aircraft/ATom/TraceGas_Aerosol_Global_Distribution                                | Kathryn McKain (NOAA) AND Colm Sweeney (NOAA) AND Steven C. Wofsy (HU) AND Bruce Daube (HU) AND Roisin Commane (HU) |
| KORUS-AQ      | LARC - NASA Langley Research Center Aircraft Campaign     |                                                                                               | Gao Chen (NASA LaRC) AND Joshua P. DiGangi (NASA-LaRC) AND Michael Shook (NASA LaRC)                                |
| SAN           | Santarem, Brazil                                          | <a href="https://doi.org/10.1594/PANGAEA.949643">https://doi.org/10.1594/PANGAEA.949643</a>   | Gatti, L.V.; Gloor, E.; Miller, J.B.; Peters, W.                                                                    |
| SCA           | Charleston, South Carolina                                | <a href="https://doi.org/10.15138/39HR-9N34">https://doi.org/10.15138/39HR-9N34</a>           | Sweeney, C.; McKain, K.                                                                                             |
| SGP           | Southern Great Plains, Oklahoma                           | <a href="https://doi.org/10.15138/39HR-9N34">https://doi.org/10.15138/39HR-9N34</a>           | Sweeney, C.; McKain, K.; Biraud, S.                                                                                 |
| TAB           | Tabatinga                                                 | <a href="https://doi.org/10.1594/PANGAEA.949643">https://doi.org/10.1594/PANGAEA.949643</a>   | Gatti, L.V.; Gloor, E.; Miller, J.B.                                                                                |
| TEF           | Tefe                                                      | <a href="https://doi.org/10.1594/PANGAEA.949643">https://doi.org/10.1594/PANGAEA.949643</a>   | Gatti, L.V.; Gloor, E.; Miller, J.B.; Peters, W.                                                                    |
| TGC           | Offshore Corpus Christi, Texas                            | <a href="https://doi.org/10.15138/39HR-9N34">https://doi.org/10.15138/39HR-9N34</a>           | McKain, K.; Sweeney, C.                                                                                             |
| THD           | Trinidad Head, California                                 | <a href="https://doi.org/10.15138/39HR-9N34">https://doi.org/10.15138/39HR-9N34</a>           | McKain, K.; Sweeney, C.                                                                                             |
| UGD           | Kajjansi Airfield, Kampala, Uganda                        | <a href="https://doi.org/10.15138/515F-N008">https://doi.org/10.15138/515F-N008</a>           | McKain, K; Sweeney, C                                                                                               |
| ULB           | Ulaanbaatar, Mongolia                                     | <a href="https://doi.org/10.15138/39HR-9N34">https://doi.org/10.15138/39HR-9N34</a>           | Sweeney, C.;                                                                                                        |
| WBI           | West Branch, Iowa                                         | <a href="https://doi.org/10.15138/39HR-9N34">https://doi.org/10.15138/39HR-9N34</a>           | McKain, K.; Sweeney, C.                                                                                             |

(a) Schuldt et al. 2024. Multi-laboratory compilation of atmospheric carbon dioxide data for the period 1957-2023; obspack\_co2\_1\_test\_GLOBALVIEWplus\_v10.1\_2024-11-13; NOAA Earth System Research Laboratory, Global Monitoring Laboratory. <http://doi.org/10.25925/20241101>

(b) Schuldt et al. 2025. Multi-laboratory compilation of atmospheric carbon dioxide data for the period 2024; obspack\_co2\_1\_NRT\_v10.1\_2025-02-07; NOAA Earth System Research Laboratory, Global Monitoring Laboratory. <http://doi.org/10.25925/20250101>.

1124  
1125

**Table S10.** Main methodological changes in the global carbon budget since first publication. Methodological changes introduced in one year are kept for the following years unless noted. Empty cells mean there were no methodological changes introduced that year.

| Publication year | Fossil fuel emissions                    |                                       |                                             | LUC emissions                                      | Reservoirs                                                         |                                                                           |                                                         | Uncertainty & other changes     |
|------------------|------------------------------------------|---------------------------------------|---------------------------------------------|----------------------------------------------------|--------------------------------------------------------------------|---------------------------------------------------------------------------|---------------------------------------------------------|---------------------------------|
|                  | Global                                   | Country (territorial)                 | Country (consumption)                       |                                                    | Atmosphere                                                         | Ocean                                                                     | Land                                                    |                                 |
| 2006 (a)         |                                          | Split in regions                      |                                             |                                                    |                                                                    |                                                                           |                                                         |                                 |
| 2007 (b)         |                                          |                                       |                                             | ELUC based on FAO-FRA 2005; constant ELUC for 2006 | 1959-1979 data from Mauna Loa; data after 1980 from global average | Based on one ocean model tuned to reproduced observed 1990s sink          |                                                         | ±1σ provided for all components |
| 2008 (c)         |                                          |                                       |                                             | Constant ELUC for 2007                             |                                                                    |                                                                           |                                                         |                                 |
| 2009 (d)         |                                          | Split between Annex B and non-Annex B | Results from an independent study discussed | Fire-based emission anomalies used for 2006-2008   |                                                                    | Based on four ocean models normalised to observations with constant delta | First use of five DGVMs to compare with budget residual |                                 |
| 2010 (e)         | Projection for current year based on GDP | Emissions for top emitters            |                                             | ELUC updated with FAO-FRA 2010                     |                                                                    |                                                                           |                                                         |                                 |
| 2011 (f)         |                                          |                                       | Split between Annex B and non-Annex B       |                                                    |                                                                    |                                                                           |                                                         |                                 |

|          |                                                |                                                               |                                                                                                                    |                                                                             |                               |                                                                  |                                                                              |                                                                                                               |
|----------|------------------------------------------------|---------------------------------------------------------------|--------------------------------------------------------------------------------------------------------------------|-----------------------------------------------------------------------------|-------------------------------|------------------------------------------------------------------|------------------------------------------------------------------------------|---------------------------------------------------------------------------------------------------------------|
| 2012 (g) |                                                | 129 countries from 1959                                       | 129 countries and regions from 1990-2010 based on GTAP8.0                                                          | ELUC for 1997-2011 includes interannual anomalies from fire-based emissions | All years from global average | Based on 5 ocean models normalised to observations with ratio    | Ten DGVMs available for SLAND; First use of four models to compare with ELUC |                                                                                                               |
| 2013 (h) |                                                | 250 countries <sup>b</sup>                                    | 134 countries and regions 1990-2011 based on GTAP8.1, with detailed estimates for years 1997, 2001, 2004, and 2007 | ELUC for 2012 estimated from 2001-2010 average                              |                               | Based on six models compared with two data-products to year 2011 | Coordinated DGVM experiments for SLAND and ELUC                              | Confidence levels; cumulative emissions; budget from 1750                                                     |
| 2014 (i) | Three years of BP data                         | Three years of BP data                                        | Extended to 2012 with updated GDP data                                                                             | ELUC for 1997-2013 includes interannual anomalies from fire-based emissions |                               | Based on seven models                                            | Based on ten models                                                          | Inclusion of breakdown of the sinks in three latitude bands and comparison with three atmospheric inversions  |
| 2015 (j) | Projection for current year based Jan-Aug data | National emissions from UNFCCC extended to 2014 also provided | Detailed estimates introduced for 2011 based on GTAP9                                                              |                                                                             |                               | Based on eight models                                            | Based on ten models with assessment of minimum realism                       | The decadal uncertainty for the DGVM ensemble mean now uses $\pm 1\sigma$ of the decadal spread across models |

|          |                                                                                                          |                                                                                           |  |                                                                         |                                     |                                                                                        |                                                                         |                                                                                                                                         |
|----------|----------------------------------------------------------------------------------------------------------|-------------------------------------------------------------------------------------------|--|-------------------------------------------------------------------------|-------------------------------------|----------------------------------------------------------------------------------------|-------------------------------------------------------------------------|-----------------------------------------------------------------------------------------------------------------------------------------|
| 2016 (k) | Two years of BP data                                                                                     | Added three small countries; China's emissions from 1990 from BP data (this release only) |  | Preliminary ELUC using FRA-2015 shown for comparison; use of five DGVMs |                                     | Based on seven models                                                                  | Based on fourteen models                                                | Discussion of projection for full budget for current year                                                                               |
| 2017 (l) | Projection includes India-specific data                                                                  |                                                                                           |  | Average of two bookkeeping models; use of 12 DGVMs                      |                                     | Based on eight models that match the observed sink for the 1990s; no longer normalised | Based on 15 models that meet observation-based criteria (see Sect. 2.5) | Land multi-model average now used in main carbon budget, with the carbon imbalance presented separately; new table of key uncertainties |
| 2018 (m) | Revision in cement emissions; Projection includes EU-specific data                                       | Aggregation of overseas territories into governing nations for total of 213 countries a   |  | Average of two bookkeeping models; use of 16 DGVMs                      | Use of four atmospheric inversions  | Based on seven models                                                                  | Based on 16 models; revised atmospheric forcing from CRUNCEP to CRUJRA  | Introduction of metrics for evaluation of individual models using observations                                                          |
| 2019 (n) | Global emissions calculated as sum of all countries plus bunkers, rather than taken directly from CDIAC. |                                                                                           |  | Average of two bookkeeping models; use of 15 DGVMs                      | Use of three atmospheric inversions | Based on nine models                                                                   | Based on 16 models                                                      |                                                                                                                                         |

|          |                                                                                                              |                                                                                                                                                                                                                                                                                                                                  |  |                                                                                                             |                                   |                                                                                                                                                 |                                                                             |  |
|----------|--------------------------------------------------------------------------------------------------------------|----------------------------------------------------------------------------------------------------------------------------------------------------------------------------------------------------------------------------------------------------------------------------------------------------------------------------------|--|-------------------------------------------------------------------------------------------------------------|-----------------------------------|-------------------------------------------------------------------------------------------------------------------------------------------------|-----------------------------------------------------------------------------|--|
| 2020 (o) | Cement carbonation now included in the EFOS estimate, reducing EFOS by about 0.2GtC yr-1 for the last decade | India's emissions from Andrew (2020: India); Corrections to Netherland Antilles and Aruba and Soviet emissions before 1950 as per Andrew (2020: CO2); China's coal emissions in 2019 derived from official statistics, emissions now shown for EU27 instead of EU28. Projection for 2020 based on assessment of four approaches. |  | Average of three bookkeeping models; use of 17 DGVMs. Estimate of gross land use sources and sinks provided | Use of six atmospheric inversions | Based on nine models. River flux revised and partitioned NH, Tropics, SH                                                                        | Based on 17 models                                                          |  |
| 2021 (p) | Projections are no longer an assessment of four approaches.                                                  | Official data included for a number of additional countries, new estimates for South Korea, added emissions from lime production in China.                                                                                                                                                                                       |  | ELUC estimate compared to the estimates adopted in national GHG inventories                                 |                                   | Average of means of eight models and means of seven data-products. Current year prediction of SOCEAN using a feed-forward neural network method | Current year prediction of SLAND using a feed-forward neural network method |  |

|          |  |  |  |                                                                                                                                                                      |                                                                                                                   |                                                                                                                                                        |                                                                                                                                          |                                                           |
|----------|--|--|--|----------------------------------------------------------------------------------------------------------------------------------------------------------------------|-------------------------------------------------------------------------------------------------------------------|--------------------------------------------------------------------------------------------------------------------------------------------------------|------------------------------------------------------------------------------------------------------------------------------------------|-----------------------------------------------------------|
| 2022 (q) |  |  |  | <p>ELUC provided at country level.<br/>Revised components decomposition of ELUC fluxes.<br/>Revision of LUC maps for Brazil.<br/>New datasets for peat drainage.</p> | <p>Use of nine atmospheric inversions</p>                                                                         | <p>Average of means of ten models and means of seven data-products</p>                                                                                 | <p>Based on 16 models. Revision of LUC maps for Brazil.</p>                                                                              |                                                           |
| 2023 (r) |  |  |  | <p>Refined components decomposition of ELUC. Revision of LUC maps for Indonesia. Use of updated peat drainage estimates.</p>                                         | <p>Use of 14 atmospheric inversions.<br/>Additional use of 4 Earth System Models to estimate current year CO2</p> | <p>Additional use of 4 Earth System Models and atmospheric oxygen method to assess SOCEAN. Regional distribution of river flux adjustment revised.</p> | <p>Based on 20 models. Additional use of 4 Earth System Models and atmospheric oxygen method to assess the net atmosphere-land flux.</p> | <p>Inclusion of an estimate of Carbon Dioxide Removal</p> |

|          |                                                   |                                                                                                      |  |                                                                                                                                                                                                            |                                         |                                                                                                 |                 |  |
|----------|---------------------------------------------------|------------------------------------------------------------------------------------------------------|--|------------------------------------------------------------------------------------------------------------------------------------------------------------------------------------------------------------|-----------------------------------------|-------------------------------------------------------------------------------------------------|-----------------|--|
| 2024 (s) | Inclusion of 2024 projections from Carbon Monitor | Inclusion of 2024 projections from Carbon Monitor for China, USA, EU27, India, and Rest of the World |  | Fourth bookkeeping estimate (LUCE). Update in land-use data (HYDE3.4) including revision of LUC maps for China. Updated definition of forest (re-)growth fluxes (consistent with 2nd State of CDR Report). | Use of 14 atmospheric inversions models | Use of 10 GOBMs, 8 fCO <sub>2</sub> -products. Added evaluation for fCO <sub>2</sub> -products. | Use of 20 DGVMs |  |
|----------|---------------------------------------------------|------------------------------------------------------------------------------------------------------|--|------------------------------------------------------------------------------------------------------------------------------------------------------------------------------------------------------------|-----------------------------------------|-------------------------------------------------------------------------------------------------|-----------------|--|

e Friedlingstein et al. (2010)

f Peters et al. (2012a)

g Le Quéré et al. (2013), Peters et al. (2013)

h Le Quéré et al. (2014)

i Le Quéré et al. (2015a)

j Le Quéré et al. (2015b)

k Le Quéré et al. (2016)

l Le Quéré et al. (2018a)

m Le Quéré et al. (2018b)

n Friedlingstein et al. (2019)

o Friedlingstein et al. (2020)

p Friedlingstein et al. (2022a)

q Friedlingstein et al. (2022b)

r Friedlingstein et al. (2023)

s Friedlingstein et al. (2025a)

1126

1127

**Table S11: Translation of global carbon cycle models' land flux definitions to the definition of the LULUCF net flux used by National GHG Inventory (NGHGI) reports to UNFCCC. Non-intact lands are used here as a proxy for "managed lands" in the country reporting. NGHGs are gap-filled (see Sec. C.2.3 for details). For comparison, we provide the net land flux on managed land from atmospheric inversions and FAOSTAT estimates. Units are GtC yr-1.**

| Carbon flux                           | Source                              | 2005-2014 | 2015-2024 |
|---------------------------------------|-------------------------------------|-----------|-----------|
| ELUC                                  | Bookkeeping estimates (see Table 5) | 1.70      | 1.37      |
| SLAND total                           | DGVMs (see Table 5)                 | 2.50      | 2.36      |
| SLAND in non-intact forest            | DGVMs                               | 1.89      | 1.89      |
| ELUC minus SLAND in non-intact forest | Bookkeeping ELUC & DGVM SLAND       | -0.19     | -0.52     |
| LULUCF                                | NGHGs                               | -0.89     | -1.05     |
| Net land flux on managed land         | Atmospheric inversions              | -0.89     | -0.68     |
| LULUCF                                | FAOSTAT                             | 0.00      | -0.01     |

1128

**Table S12 - Evaluation of global ocean biogeochemistry models based on comparison with observation-based interior ocean carbon accumulation and process-based evaluation metrics for Atlantic Meridional Overturning Circulation (AMOC), Southern Ocean sea surface salinity and surface ocean Revelle factor (following the RECCAP2 ocean model evaluation chapter, Terhaar et al., 2024) and Southern Ocean stratification index (Bourgeois et al., 2022). See supplementary text C3.3 for details of calculation and observational data sources.**

|                                                                                                                        |              | Global Ocean Biogeochemistry Models |           |                 |                         |                 |            |                    |                 |                             |              |
|------------------------------------------------------------------------------------------------------------------------|--------------|-------------------------------------|-----------|-----------------|-------------------------|-----------------|------------|--------------------|-----------------|-----------------------------|--------------|
| Metric                                                                                                                 | Observations | ACCESS (CSIRO)                      | CESM-ETHZ | FESOM 2.1-REcoM | MOM6-Cobalt (Princeton) | MPIOM -HAMOC C6 | MRI-ESM2-3 | NEMO-PISCES (IPSL) | NEMO-PlankTOM12 | NEMO3.6-PISCESv2-gas (CNRM) | NorESM-OC1.2 |
| <b>Interior ocean anthropogenic carbon accumulation in GtC yr<sup>-1</sup></b>                                         |              |                                     |           |                 |                         |                 |            |                    |                 |                             |              |
| Global (1994-2007, Gruber et al., 2019)                                                                                | 33.8 ± 4.0   | 35.6                                | 26.9      | 32.0            | 33.0                    | 19.9            | 27.9       | 32.6               | 25.4            | 27.1                        | 33.4         |
| North (1994-2007, Gruber et al., 2019)                                                                                 | 5.9          | 6.1                                 | 5.6       | 5.8             | 3.8                     | 3.6             | 5.7        | 6.4                | 4.2             | 5.8                         | 6.8          |
| Tropics (1994-2007, Gruber et al., 2019)                                                                               | 17.5         | 15.3                                | 8.7       | 13.8            | 14.5                    | 7.2             | 12.7       | 15.7               | 12.5            | 13.4                        | 13.6         |
| South (1994-2007, Gruber et al., 2019)                                                                                 | 10.4         | 14.2                                | 12.6      | 12.4            | 14.6                    | 9.1             | 9.6        | 11.0               | 8.6             | 8.8                         | 13.0         |
| Global (1994-2004, Müller et al., 2023)                                                                                | 29.3 ± 2.5   | 26.0                                | 19.2      | 23.7            | 24.8                    | 15.3            | 20.5       | 24.1               | 18.5            | 21.2                        | 24.7         |
| Global (2004-2014, Müller et al., 2023)                                                                                | 27.3 ± 2.5   | 30.8                                | 23.3      | 27.9            | 29.1                    | 18.5            | 24.0       | 28.1               | 22.4            | 23.8                        | 28.4         |
| <b>Atlantic Meridional Overturning Circulation at 26°N, 2005-2023 in Sv (Moat et al., 2025)</b>                        |              |                                     |           |                 |                         |                 |            |                    |                 |                             |              |
|                                                                                                                        | 16.9 ± 1.2   | 6.8                                 | 13.8      | 10.2            | 4.8                     | 14.9            | 13.2       | 13.2               | 17.8            | 13.0                        | 22.8         |
| <b>Southern Ocean sea surface salinity 2005-2024 in psu (Good et al., 2013)</b>                                        |              |                                     |           |                 |                         |                 |            |                    |                 |                             |              |
| subpolar seasonally stratified biome (SPSS)                                                                            | 33.944       | 34.194                              | 33.826    | 34.256          | 34.859                  | 33.927          | 34.059     | 34.192             | 33.873          | 33.823                      | 34.116       |
| subpolar seasonally stratified and subtropical seasonally stratified biomes (SPSS+STSS)                                | 34.309       | 34.571                              | 34.266    | 34.557          | 34.859                  | 34.280          | 34.392     | 34.544             | 34.386          | 34.149                      | 34.541       |
| <b>Southern Ocean stratification index 2005-2024, in kg m<sup>-3</sup> (Bourgeois et al., 2022, Good et al., 2013)</b> |              |                                     |           |                 |                         |                 |            |                    |                 |                             |              |
|                                                                                                                        | 5.88         | 5.44                                | 6.16      | 5.67            | 5.73                    | 5.96            | 5.97       | 5.53               | 5.06            | 6.18                        | 5.76         |
| <b>Surface ocean Revelle factor</b>                                                                                    |              |                                     |           |                 |                         |                 |            |                    |                 |                             |              |
| 1997-2007, unitless (GLODAPv2.2016, Lauvset et al., 2016)                                                              | 10.49        | 10.59                               | 10.02     | 10.64           | 10.64                   | 10.70           | 10.56      | 10.68              | 10.46           | 10.74                       | 10.54        |
| 2005-2022, unitless (OceanSODA_v2023, updated from Gregor and Gruber, 2021)                                            | 10.91        | 10.91                               | 10.31     | 10.95           | 10.94                   | 11.02           | 10.89      | 10.98              | 10.77           | 11.05                       | 10.87        |

Table S13 fCO<sub>2</sub> data sets suspended from SOCATv2025 (Bakker et al., 2016, 2025) included in earlier SOCAT versions.

| Expocode     | Platform Name          | Regions                                                    | Principal Investigators                                        | Platform Type   | Included in SOCAT versions | Suspended from SOCAT version | Reason for suspension or exclusion                                                                  |
|--------------|------------------------|------------------------------------------------------------|----------------------------------------------------------------|-----------------|----------------------------|------------------------------|-----------------------------------------------------------------------------------------------------|
| 11SS20201023 | Simon Stevin           | coastal                                                    | Gkritzalis, T.                                                 | Research vessel | v2022-v2024                | v2025                        | Warming of upto 18°C                                                                                |
| 11SS20211101 | Simon Stevin           | coastal                                                    | Gkritzalis, T.                                                 | Research vessel | v2022-v2024                | v2025                        | Warming of upto 16°C                                                                                |
| 18DL20100701 | CCGS Amundsen          | Arctic Ocean, coastal                                      | Papakyriakou, T.                                               | Research vessel | v2019-v2024                | v2025                        | Temperature sensors swapped                                                                         |
| 18DL20110718 | CCGS Amundsen          | Arctic Ocean, coastal                                      | Papakyriakou, T.                                               | Research vessel | v2019-v2024                | v2025                        | Temperature sensors swapped                                                                         |
| 18DL20130725 | CCGS Amundsen          | Arctic Ocean                                               | Papakyriakou, T., Else, B., Burgers, T., Thomas, H., Mucci, A. | Research vessel | v2018(v6)-v2024            | v2025                        | Temperature sensors swapped. Overlap with 18DL20130726                                              |
| 18DL20130726 | CCGS Amundsen          | Arctic Ocean                                               | Papakyriakou, T.                                               | Research vessel | v2019-v2024                | v2025                        | Temperature sensors swapped. Overlap with 18DL20130725                                              |
| 18DL20140707 | CCGS Amundsen          | Arctic Ocean, coastal                                      | Papakyriakou, T.                                               | Research vessel | v2019-v2024                | v2025                        | Temperature sensors swapped                                                                         |
| 18DL20140708 | CCGS Amundsen          | Arctic Ocean                                               | Papakyriakou, T., Else, B., Burgers, T., Thomas, H., Mucci, A. | Research vessel | v2018(v6)-v2024            | v2025                        | Data set updated as 18DL20140707                                                                    |
| 18DL20150417 | CCGS Amundsen          | Arctic Ocean, coastal                                      | Papakyriakou, T.                                               | Research vessel | v2019-v2024                | v2025                        | Temperature sensors swapped                                                                         |
| 18DL20160802 | CCGS Amundsen          | Arctic Ocean                                               | Papakyriakou, T.                                               | Research vessel | v2021-v2024                | v2025                        | Temperature sensors swapped                                                                         |
| 29SG20210528 | RV Sarmiento de Gambao | North Atlantic, coastal                                    | Velo, A.                                                       | Research vessel | v2023-v2024                | v2025                        | awaits update                                                                                       |
| 29SG20210630 | RV Sarmiento de Gambao | North Atlantic, coastal                                    | Velo, A.                                                       | Research vessel | v2023-v2024                | v2025                        | awaits update                                                                                       |
| 29SG20211115 | RV Sarmiento de Gambao | North Atlantic, Tropical Atlantic, Southern Ocean, coastal | Padin, X. A.                                                   | Research vessel | v2023-v2024                | v2025                        | awaits update                                                                                       |
| 29SG20220911 | RV Sarmiento de Gambao | North Atlantic, coastal                                    | Fontela, M.                                                    | Research vessel | v2023-v2024                | v2025                        | awaits update                                                                                       |
| 91AA20190718 | SA Agulhas II          | Southern Ocean                                             | Hamnca, S., Monteiro, P. M. S.                                 | Research vessel | v2024                      | v2025                        | near-zero warming, despite variable seawater temperature and fugacity of CO <sub>2</sub> , metadata |

|              |               |                |                                              |                 |       |       |                                                                                               |
|--------------|---------------|----------------|----------------------------------------------|-----------------|-------|-------|-----------------------------------------------------------------------------------------------|
|              |               |                |                                              |                 |       |       | incomplete                                                                                    |
| 91AA20191013 | SA Agulhas II | Southern Ocean | Hamnca, S., Monteiro, P. M. S.               | Research vessel | v2024 | v2025 | temperature sensors offset by 2 hours, metadata incomplete                                    |
| 91AA20191217 | SA Agulhas II | Southern Ocean | Hamnca, S., Monteiro, P. M. S.               | Research vessel | v2024 | v2025 | temperature sensors offset by 2 hours, metadata incomplete                                    |
| 91AA20220711 | SA Agulhas II | Southern Ocean | Hamnca, S.                                   | Research vessel | v2024 | v2025 | temperature sensors offset by 2 hours, fCO2 exceeds highest standard gas, metadata incomplete |
| 91AA20221219 | SA Agulhas II | Southern Ocean | Hamnca, S., Tsanwani, M., Monteiro, P. M. S. | Research vessel | v2024 | v2025 | unacceptable data, metadata incomplete                                                        |

1131

1132

## Supplementary figures

1133

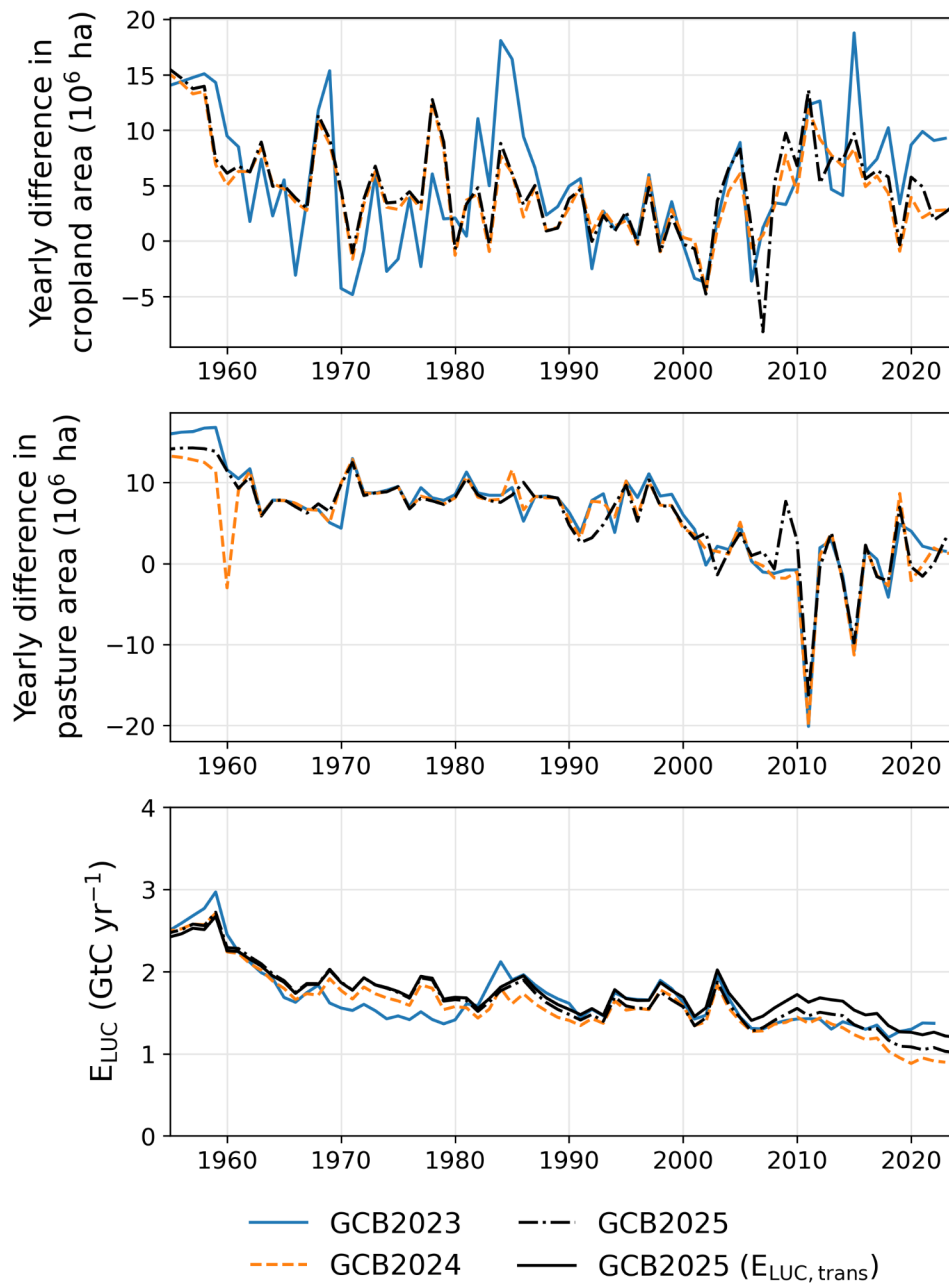

1134

1135

1136 **Figure S1.** Differences in the HYDE/LUH2 land-use forcing used for the global carbon budgets GCB2023  
 1137 (Friedlingstein et al., 2023), GCB2024 (Friedlingstein et al., 2025a), and GCB2025 (this paper). Shown are  
 1138 year-to-year changes in cropland area (top panel) and pasture area (middle panel). To illustrate the relevance of  
 1139 the update in the land-use forcing for the recent trends in  $E_{LUC}$ , the bottom panel shows the land-use emission  
 1140 estimate from the bookkeeping model BLUE (original model output, i.e., excluding emissions from peat fire and  
 1141 peat drainage). The inclusion of transient carbon densities in GCB2025 is also shown on the bottom panel.

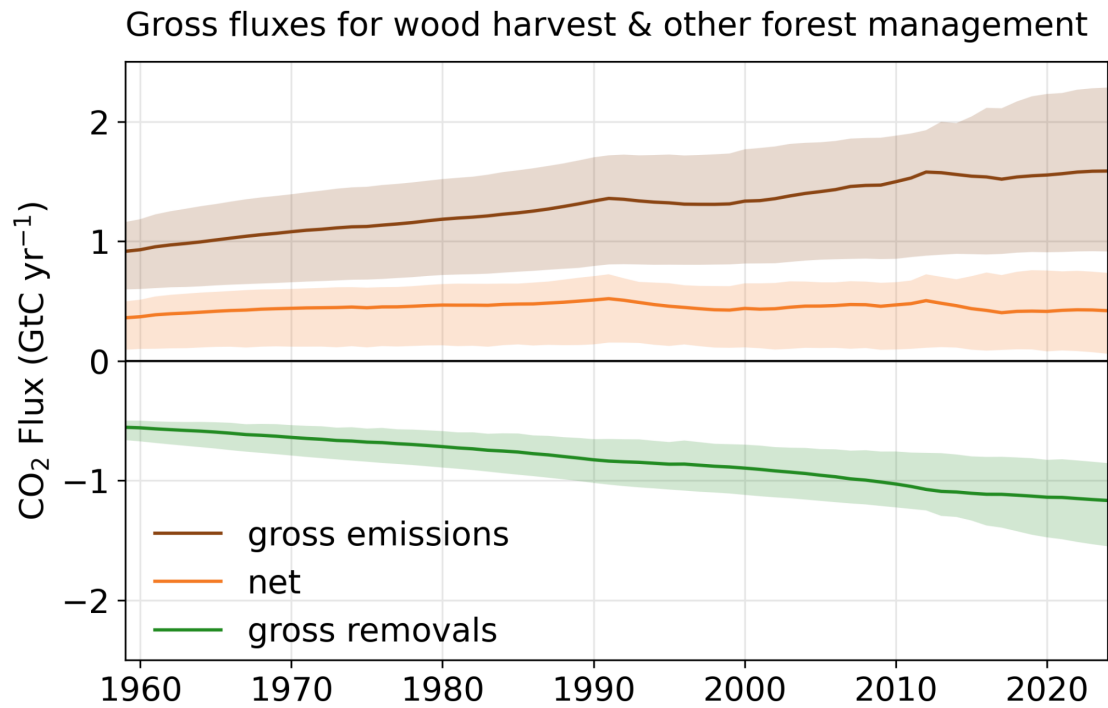

1142  
1143

1144 **Figure S2.** Split of net CO<sub>2</sub> fluxes from wood harvest and other forest management into gross emissions and  
 1145 gross removals. Solid lines denote the average of the three bookkeeping models and shaded areas the full range  
 1146 (min-max) of the bookkeeping model estimates. Gross wood harvest emissions amount to 1.6 [0.9, 2.2]  
 1147 GtC yr<sup>-1</sup> in 2015-2024 resulting from the decomposition of slash and the decay of wood products. Gross  
 1148 removals amount to -1.1 [-1.5, -0.8] GtC yr<sup>-1</sup> in 2015-2024 resulting from regrowth after wood harvesting.  
 1149

$E_{LUC}$  estimates with H&C2023 (4 models) and without H&C2023 (3 models)

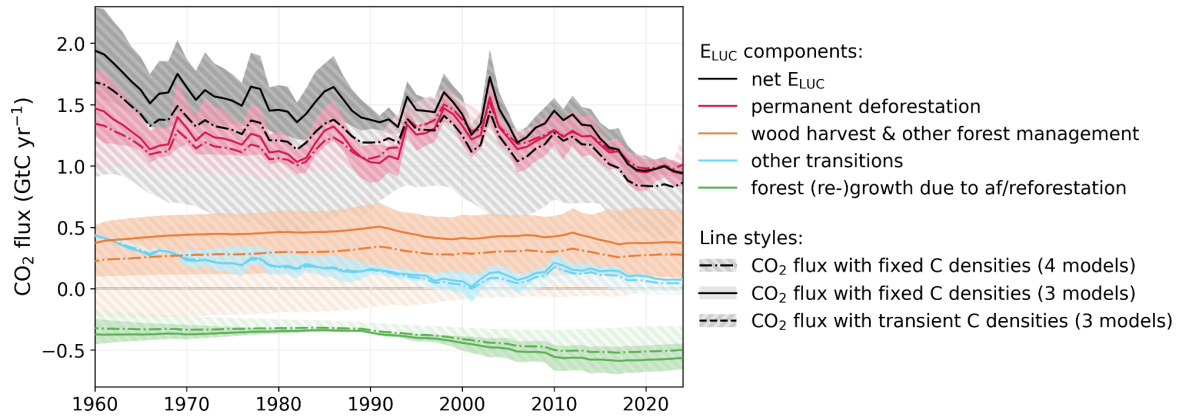

$E_{LUC}$  estimates with fixed and transient C densities

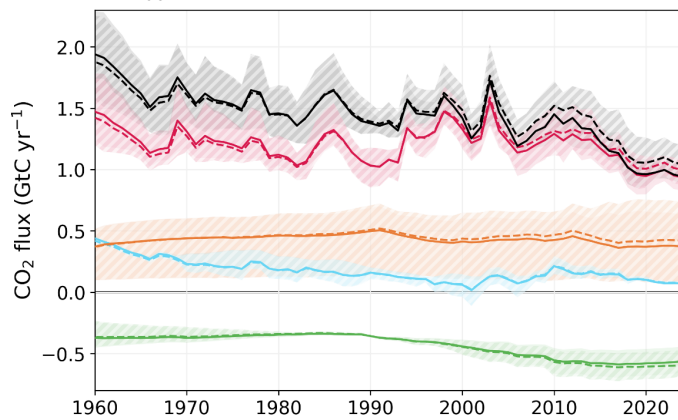

1150

1151 **Figure S3.** Effects of methodological changes in GCB2025 on land-use change emissions ( $E_{LUC}$ ) estimates for  
 1152 net  $E_{LUC}$  and sub-components. Top: Comparison of  $E_{LUC}$  estimates based on three bookkeeping models (BLUE,  
 1153 LUCE, OSCAR) and four bookkeeping models (BLUE, LUCE, H&C2023, OSCAR) using fixed carbon  
 1154 densities. Bottom: Comparison of  $E_{LUC}$  estimates with fixed and transient carbon densities using estimates from  
 1155 the three bookkeeping models that are able to estimate  $E_{LUC}$  with transient carbon densities (BLUE, LUCE,  
 1156 OSCAR). The GCB2025  $E_{LUC}$  estimates are based on simulations with transient carbon densities from BLUE,  
 1157 LUCE, and OSCAR. Shading represents the minimum-to-maximum range across bookkeeping estimates.  
 1158

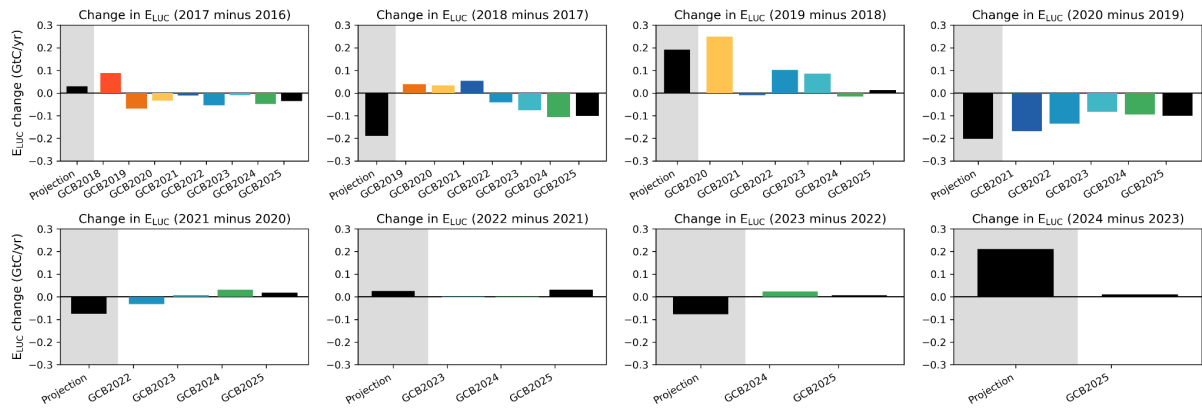

1159

1160

1161

1162

1163

1164

**Figure S4.** Comparison of initial  $E_{LUC}$  projections ( $E_{LUC}$  changes relative to the  $E_{LUC}$  estimate in the previous year) based on anomalies in peat fires in equatorial Asia and tropical deforestation and degradation fires with updated estimates in later global carbon budgets (GCBs) based on bookkeeping model simulations. Black bars on gray background indicate  $E_{LUC}$  projections; colored bars indicate bookkeeping  $E_{LUC}$  estimates from later GCB versions (with the GCB2025 bookkeeping  $E_{LUC}$  estimate in black).

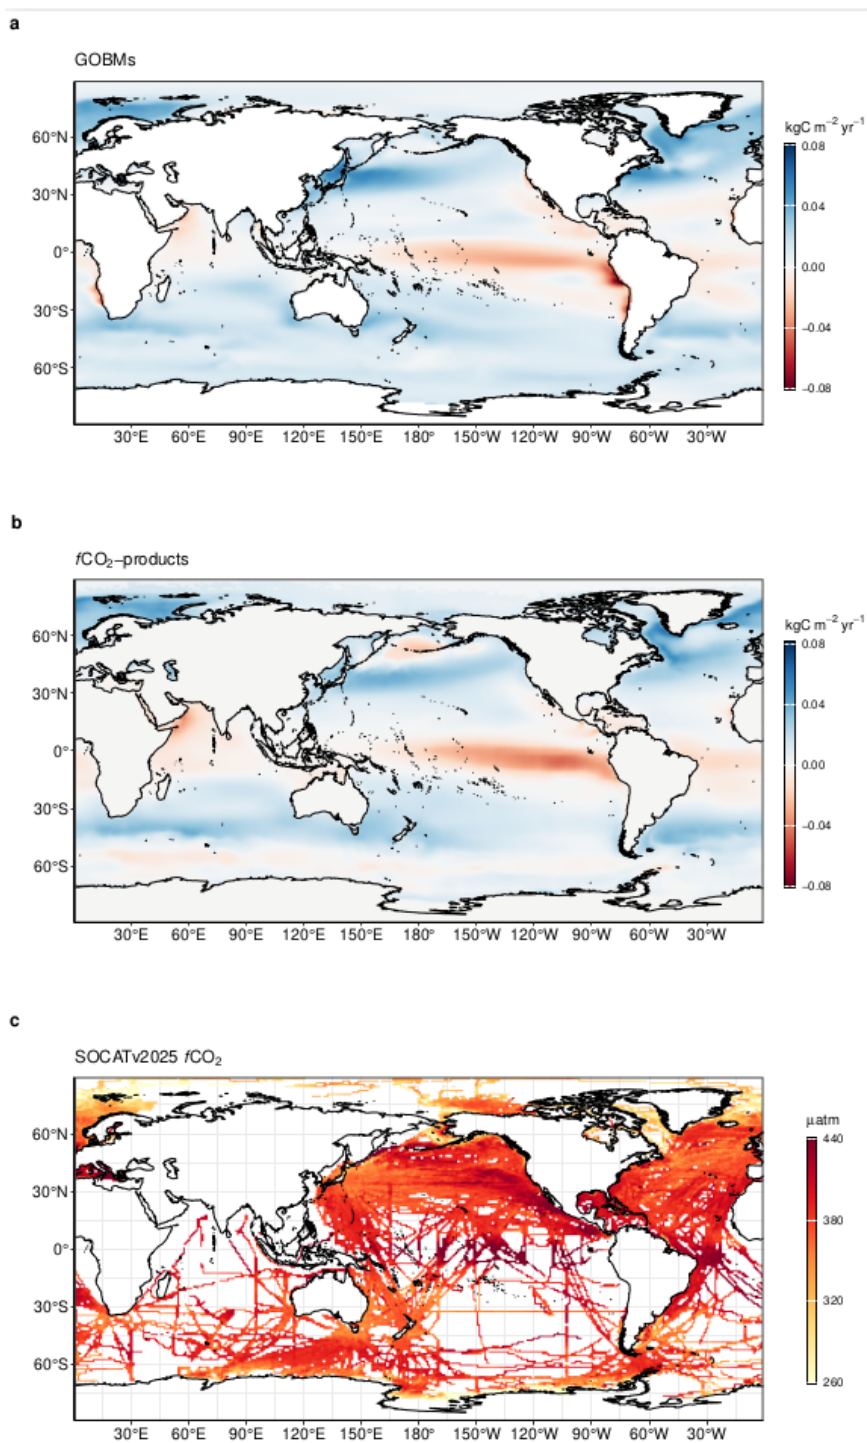

1166

1167 **Figure S5.** Ensemble mean air-sea CO<sub>2</sub> flux from a) global ocean biogeochemistry models and b) *f*CO<sub>2</sub> based  
 1168 data products, averaged over 2015-2024 period (kgC m<sup>-2</sup> yr<sup>-1</sup>). Positive numbers indicate a flux into the ocean.  
 1169 c) gridded SOCATv2025 *f*CO<sub>2</sub> measurements, averaged over the 2015-2024 period (µatm). In (a) model  
 1170 simulation A is shown. The *f*CO<sub>2</sub>-products represent the contemporary flux, i.e. including outgassing of riverine  
 1171 carbon, which is estimated to amount to 0.65 GtC yr<sup>-1</sup> globally.

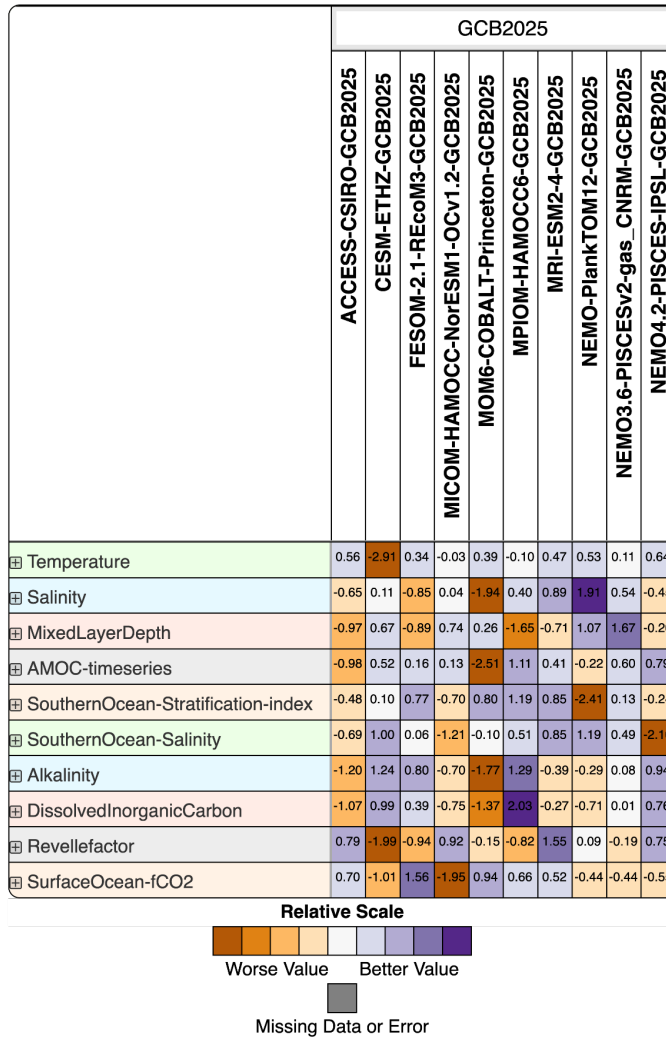

1172  
1173  
1174  
1175  
1176  
1177  
1178  
1179  
1180  
1181  
1182  
1183  
1184  
1185

**Figure S6.** Evaluation of the GOBMs using the IOMB scheme considering physical (sea surface temperature, sea surface salinity, mixed layer depth, Southern Ocean stratification index, Southern Ocean subpolar biome surface salinity, and Atlantic Meridional Overturning Circulation (AMOC)) and biogeochemical variables (surface dissolved inorganic carbon, alkalinity, Revelle factor and CO<sub>2</sub> fugacity (*f*CO<sub>2</sub>)). See section S3.3 for observational data sets and statistical metrics included.

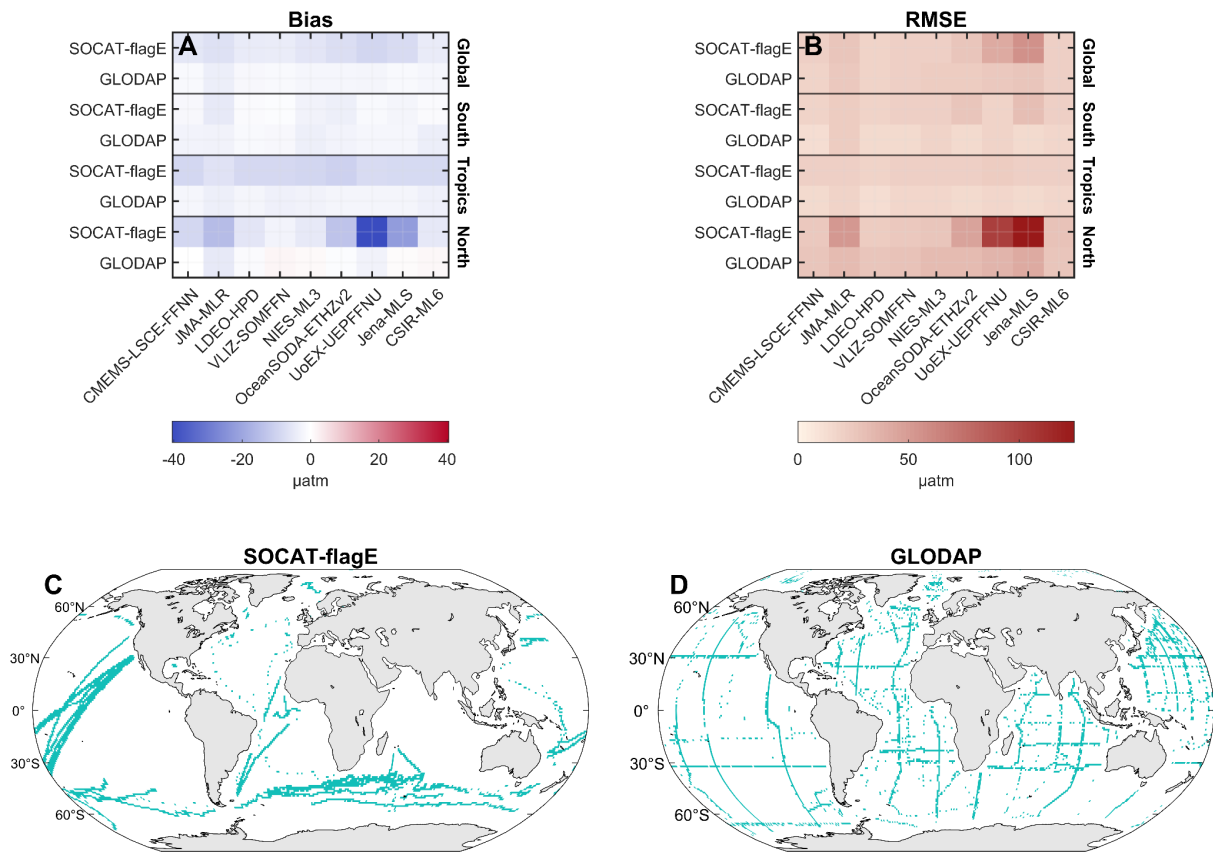

1186  
 1187  
 1188  
 1189  
 1190  
 1191  
 1192

**Figure S7:** Bias (a) and RMSE (b) between independent observations from the SOCAT flag E and GLODAPv2 datasets with 9  $f\text{CO}_2$ -products included in the global carbon budget. Panels C and D show the location of the observations in the global ocean.

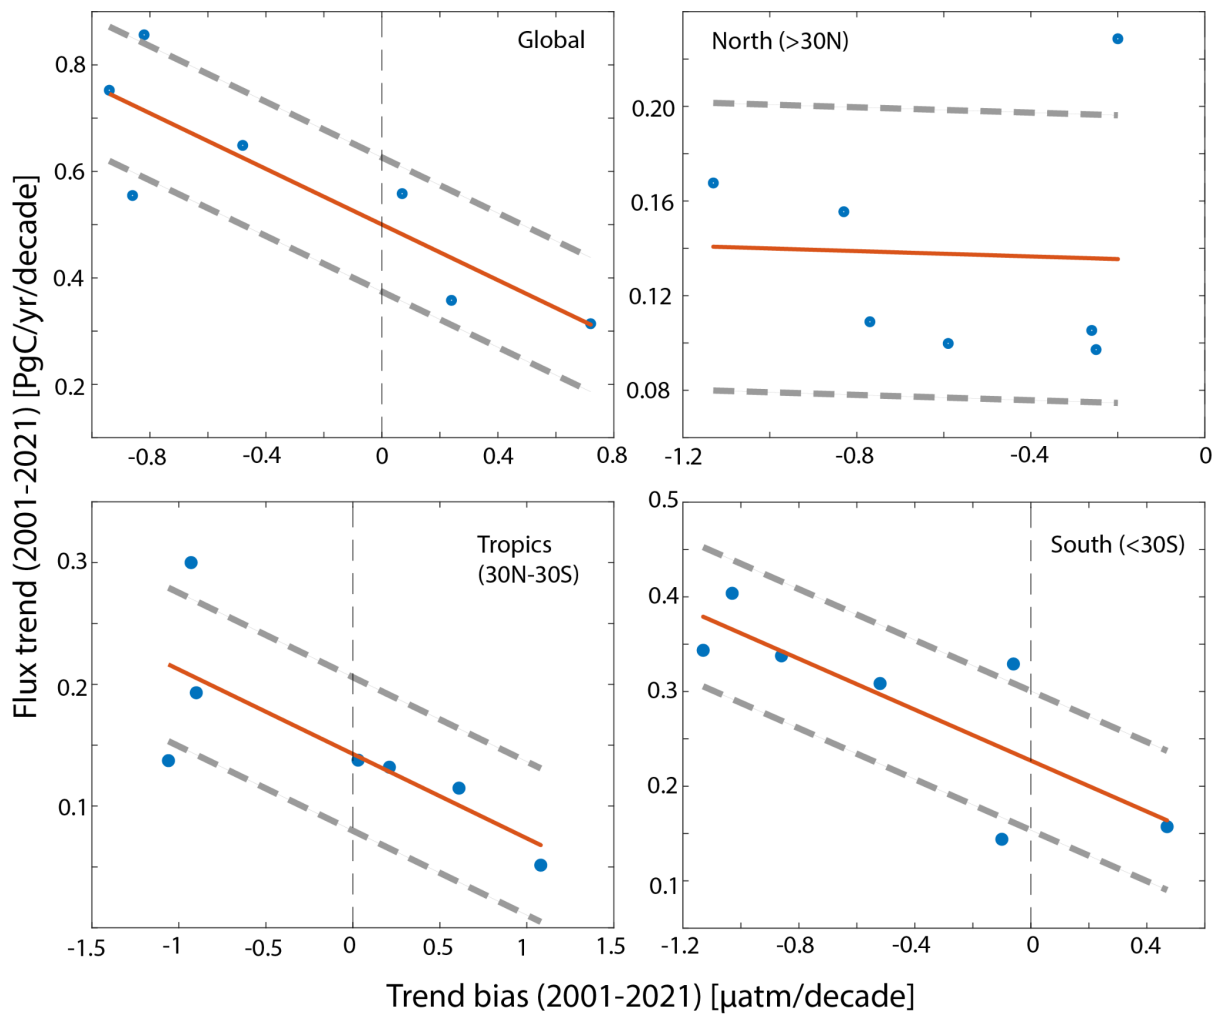

1193  
1194

1195 **Figure S8.** Trend evaluation of six from the eight  $f\text{CO}_2$ -products used for  $\text{SoCEAN}$  (blue circles - CSIR-ML6,  
1196 NIES-ML3, VLIZ-SOMFFN, OceanSODA-ETHZv2, JMA-MLR, Jena-MLS). The x-axis represents the mean  
1197  $f\text{CO}_2$  trend bias from a model subsampling exercise (following Hauck et al., 2023a) using four of the GCB2023  
1198 GOBMs (CESM, FESOM-REcoM, IPSL and MRI-ESM). The y-axis represents the flux trend as submitted by  
1199 the  $f\text{CO}_2$  product to this study. Besides the northern hemisphere, where all of the six  $f\text{CO}_2$ -products overestimate  
1200 the subsampled model trend, there is a clear relationship between the trend reconstruction bias and the flux trend  
1201 (red line with grey dashed lines representing the 1 sigma uncertainty interval), indicating that flux trends are  
1202 sensitive to the  $f\text{CO}_2$ -products ability to reconstruct biases.

1203

1204

1205

1206

1207

1208

1209

1210

1211

GOBMs – Ocean Sink Anomaly 2024

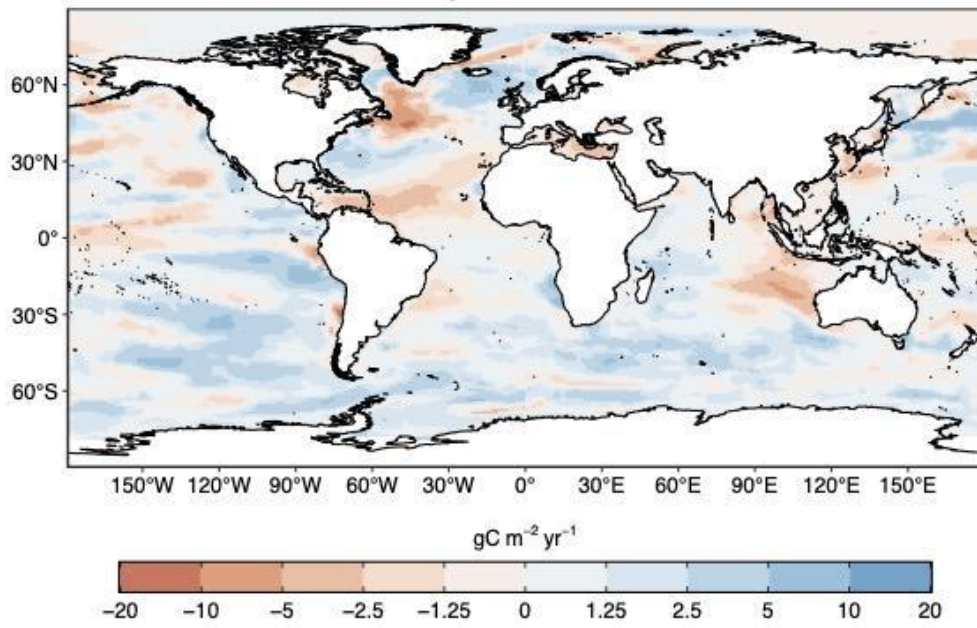

pCO<sub>2</sub> – Ocean Sink Anomaly 2024

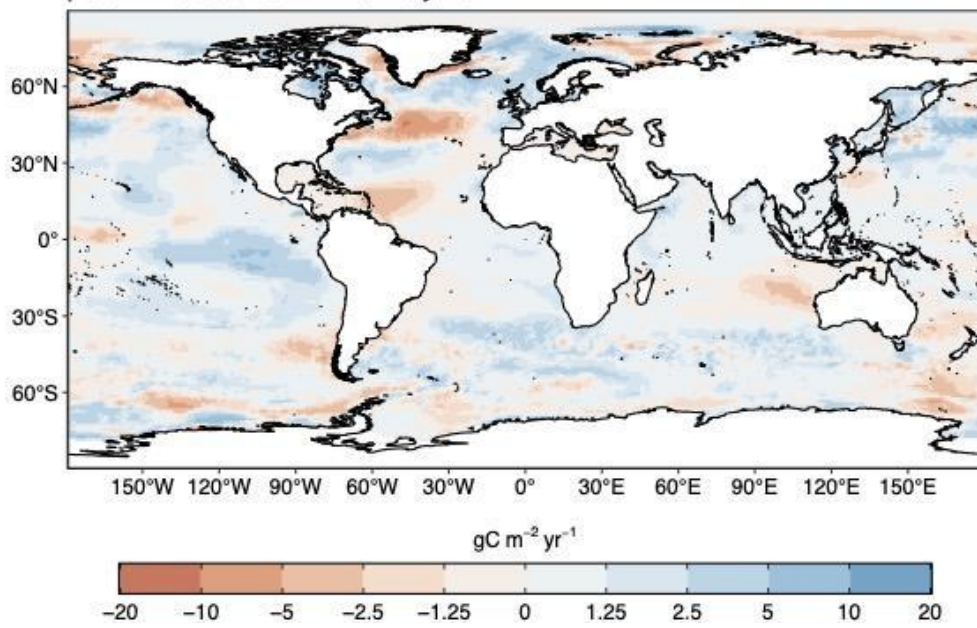

1212

1213

1214 **Figure S9** Anomalies in the ocean sink for 2024, as in Figure 11c, but here separated into the anomalies derived

1215 from (top) GOBMs and (bottom)  $f\text{CO}_2$ -products. Maps show the 2024 fluxes relative to 2015-2024 decadal

1216 mean. Units are  $\text{gC m}^{-2} \text{yr}^{-1}$ .

1217

1218

1219  
1220

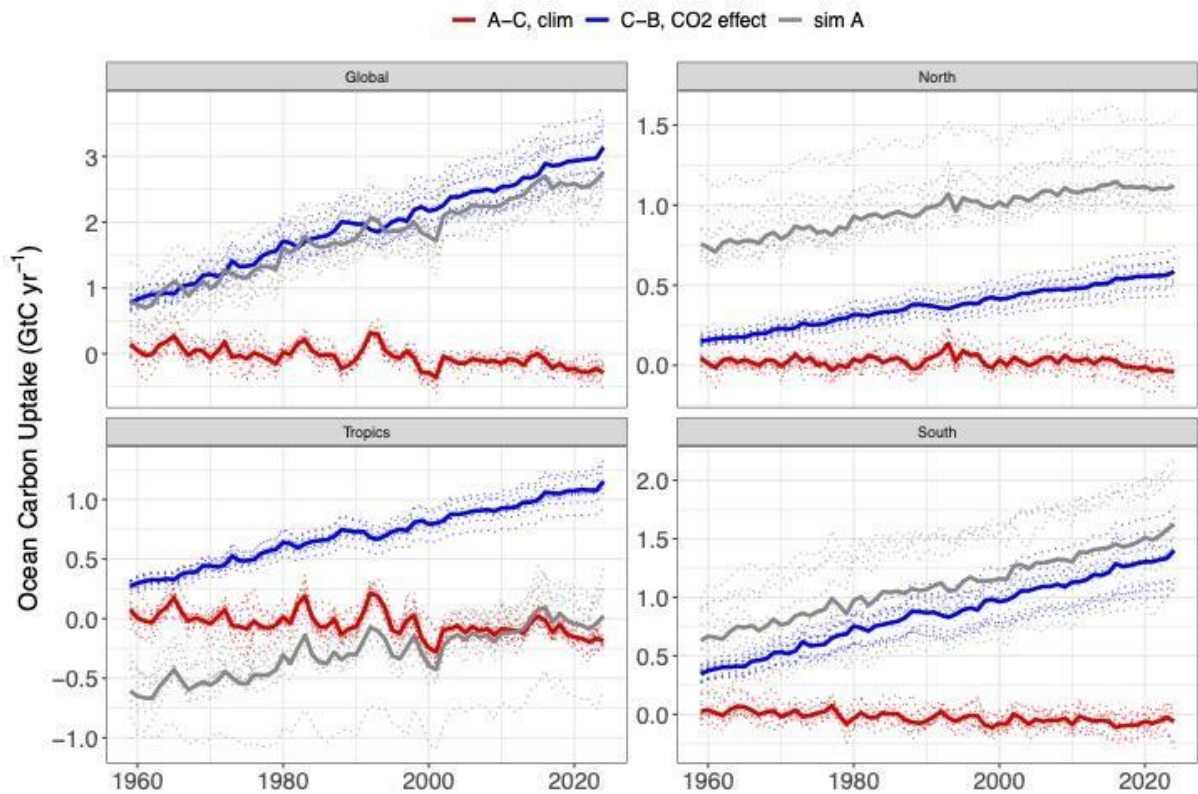

1221  
1222  
1223  
1224  
1225  
1226  
1227  
1228  
1229

**Figure S10** Time-series of CO<sub>2</sub> and climate effects on the SO<sub>OCEAN</sub> in the global ocean, and three latitudinal bands (north, tropics, south) as indicated in the panels. Dotted lines show individual global ocean biogeochemistry models and solid lines indicate the ensemble mean. The grey line shows the contemporary flux (simulation A) without adjustments, which represents the sum of natural fluxes, CO<sub>2</sub> and climate effects, bias and drift. The CO<sub>2</sub> and climate effects are calculated from simulation C minus B and A minus C, respectively. See section S3.2 on GOBM simulations.

1230  
1231

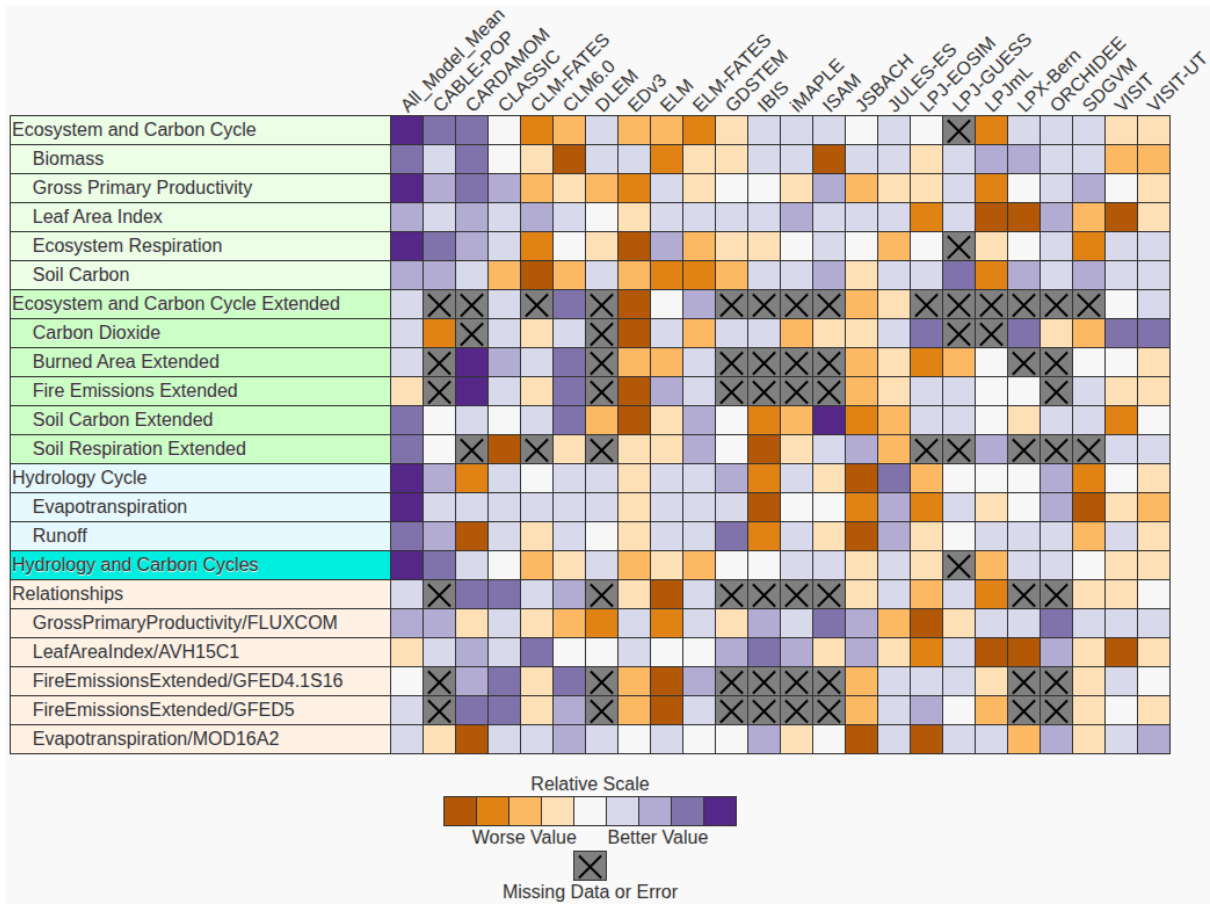

1232

1233 **Figure S11.** Evaluation of the DGVMs using the International Land Model Benchmarking system (ILAMB;  
 1234 Collier et al., 2018). Skill scores relative to other models. The benchmarking is done with observations for  
 1235 vegetation biomass (Santoro and Cartus, 2021; Saatchi et al., 2011; Thurner et al. 2014; Santoro et al. 2024; Xu  
 1236 et al., 2021), GPP and ecosystem respiration (Reichstein et al., 2007; Lasslop et al., 2010; Knauer et al., 2018;  
 1237 Jung et al., 2017; Tramontana et al., 2016; Alemohammad et al., 2017), leaf area index (Vermote, 2019;  
 1238 Claverie et al., 2016; De Kauwe et al., 2011; Myneni et al., 1997), soil carbon (Hugelius et al., 2013; Fischer et  
 1239 al., 2008), soil respiration (Tang et al., 2019, 2020; Raich et al., 2002; Hashimoto et al., 2015; Hashimoto et al.,  
 1240 2023), carbon dioxide (Dlugokencky et al., 2013; Liptak et al., 2017), burned area and fire emissions (Chen et  
 1241 al., 2023), evapotranspiration (De Kauwe et al., 2011; Martens et al., 2017; Miralles et al., 2011; Mu et al.,  
 1242 2011), and runoff (Dai and Trenberth, 2002; Hobeichi et al., 2019; Hobeichi et al., 2020). Metrics include  
 1243 relationships between carbon cycle variables, precipitation (Adler et al., 2003) and temperature (Harris et al.,  
 1244 2014). For each model–observation comparison a series of error metrics are calculated, scores are then  
 1245 calculated as an exponential function of each error metric, and finally for each variable the multiple scores from  
 1246 different metrics and observational datasets are combined to give the overall variable scores. Overall variable  
 1247 scores increase from 0 to 1 with improvements in model performance. The All\_Model\_Mean does not include  
 1248 CARDAMOM. The set of error metrics vary with dataset and can include metrics based on the period mean,  
 1249 bias, root mean squared error, spatial distribution, interannual variability, and seasonal cycle. The relative skill  
 1250 score shown is a Z score, which indicates in units of standard deviation the model scores relative to the mean  
 1251 score for a given variable. The overall score is given in the row ‘Hydrology and Carbon Cycles’, which  
 1252 represents a weighted average of the ‘Hydrology Cycle’ score and the ‘Ecosystem and Carbon Cycle’ score.  
 1253 Grey boxes with x’s represent missing model data.

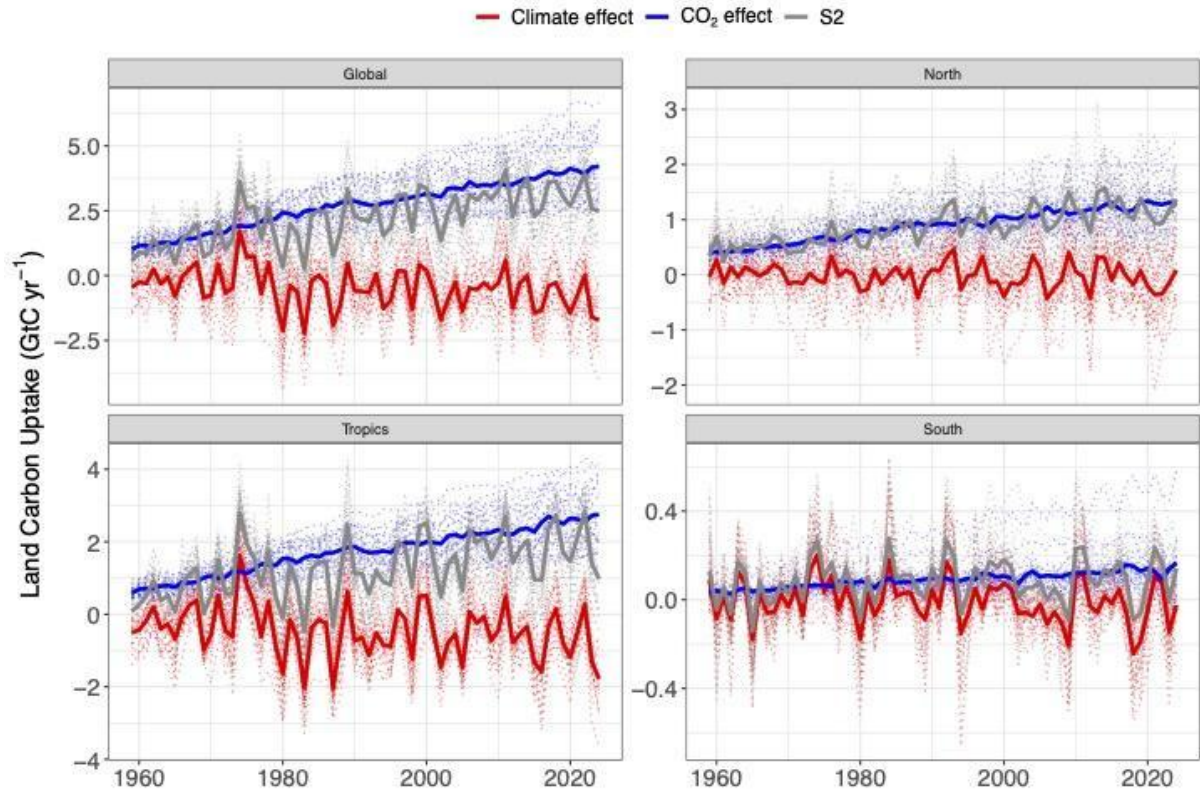

1254

1255

1256

**Figure S12.** Time-series of CO<sub>2</sub> and climate effects on the land sink for global land, and three latitudinal bands (north, tropics, south) as indicated in the panels. Dotted lines show individual dynamic global vegetation models and solid lines indicate the ensemble mean. The grey line shows the S<sub>LAND</sub> flux (simulation S2) without RSS adjustment, which represents the sum of natural fluxes, CO<sub>2</sub> and climate effects. The CO<sub>2</sub> and climate effects are calculated from simulations S1 minus S0 and S2 minus S1 plus S0, respectively. See section S4.1 on DGVM simulations.

1259

1260

1261

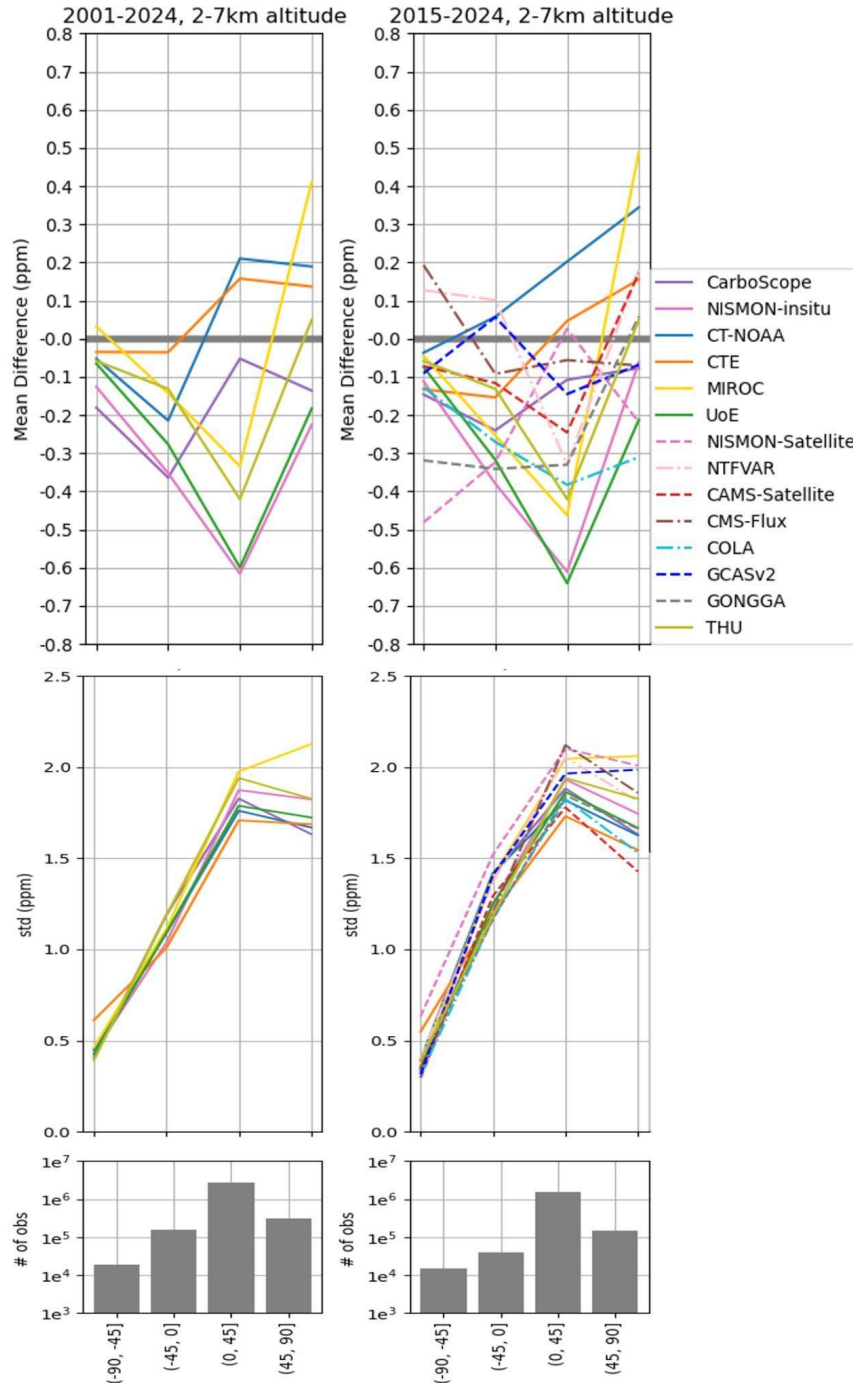

1262  
1263

1264 **Figure S13.** Evaluation of the atmospheric inversion products. The mean of the model minus observations is  
 1265 shown for four latitude bands in three periods: (first panel) 2001-2024, (second panel) 2015-2024. The 14  
 1266 systems are compared to independent CO<sub>2</sub> observations from aircraft over many places of the world between 2  
 1267 and 7 km above sea level. Aircraft measurements archived in the Cooperative Global Atmospheric Data  
 1268 Integration Project (Schuldt et al., 2024, Schuldt et al., 2025) from sites, campaigns or programs that have not  
 1269 been assimilated and cover at least 9 months (except for SH programs) between 2001 and 2024, have been used  
 1270 to compute the biases (top row) and their standard deviations (middle row) in four 45° latitude bins. Land and  
 1271 ocean data are used without distinction, and observation density varies strongly with latitude and time as seen on  
 1272 the lower panels.

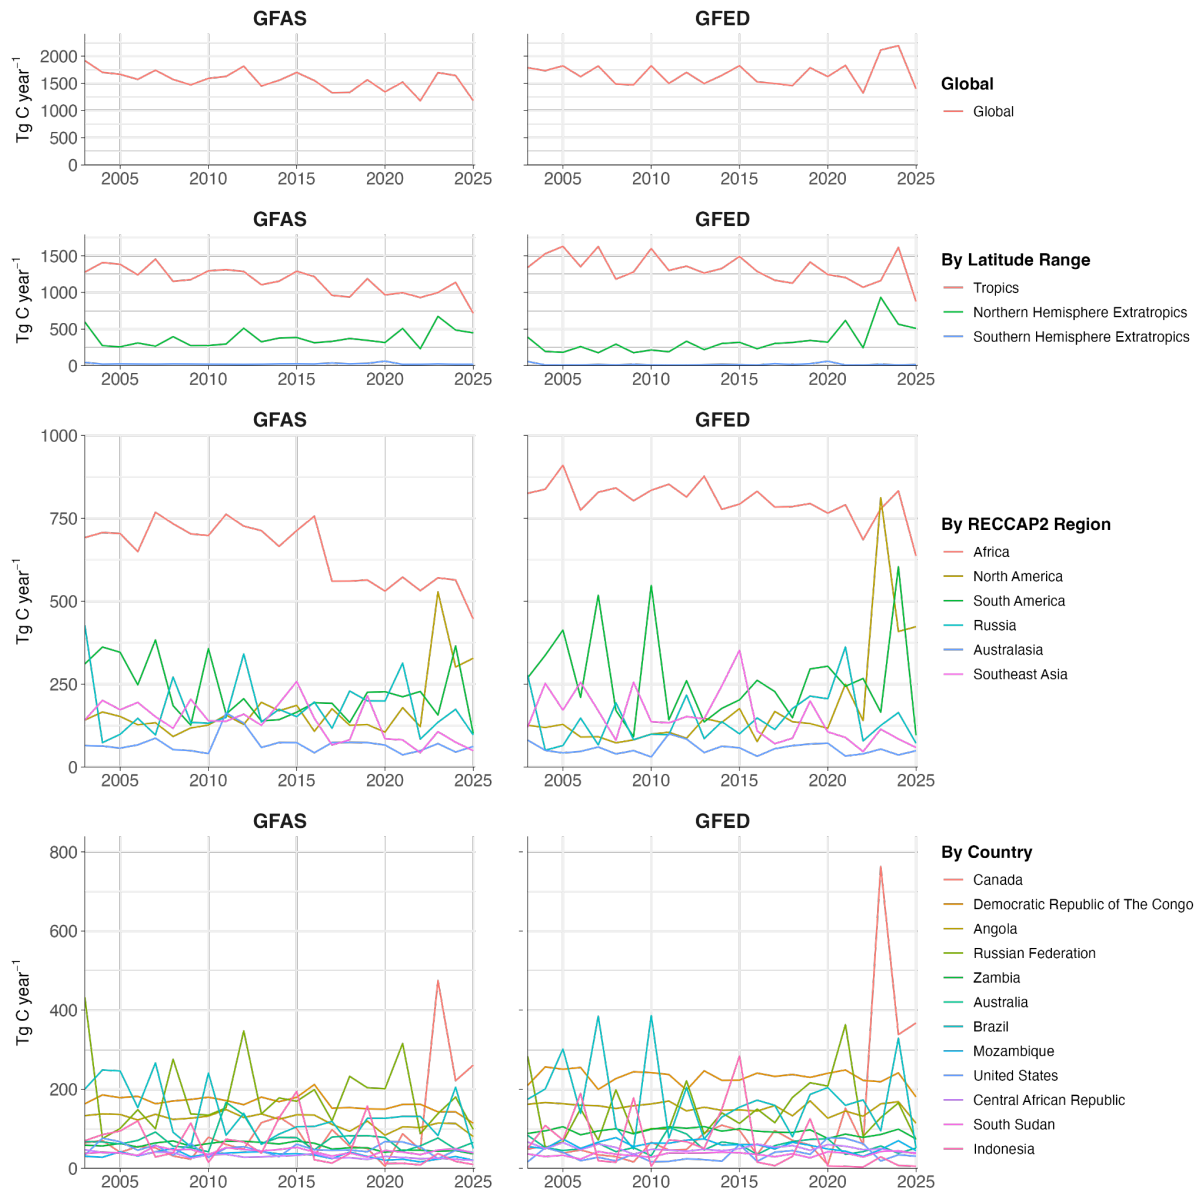

1273

1274 **Figure S14.** Fire carbon emissions for the months January-September for each year 2003-2025 from two global  
 1275 fire emissions products. (Top row) Global emissions. (Middle row) Emissions for the northern hemisphere extra  
 1276 tropics ( $>30^{\circ}$  N), tropics ( $30^{\circ}$ N- $30^{\circ}$ S) and southern extra tropics ( $>30^{\circ}$ S). (Bottom row) Emissions by  
 1277 RECCAP2 region. The Global Fire Assimilation System (GFAS; Di Giuseppe et al., 2018) (left column) and the  
 1278 Global Fire Emissions Database (GFED, version 4.1s; van der Werf et al., 2017) (right column) are among the  
 1279 most widely applied global fire emissions products based on satellite remote sensing of fire. GFED relies on the  
 1280 post-fire detection of burned areas combined with fuel consumption factors. GFAS relies on the detection of  
 1281 thermal energy release during active fires.

1282

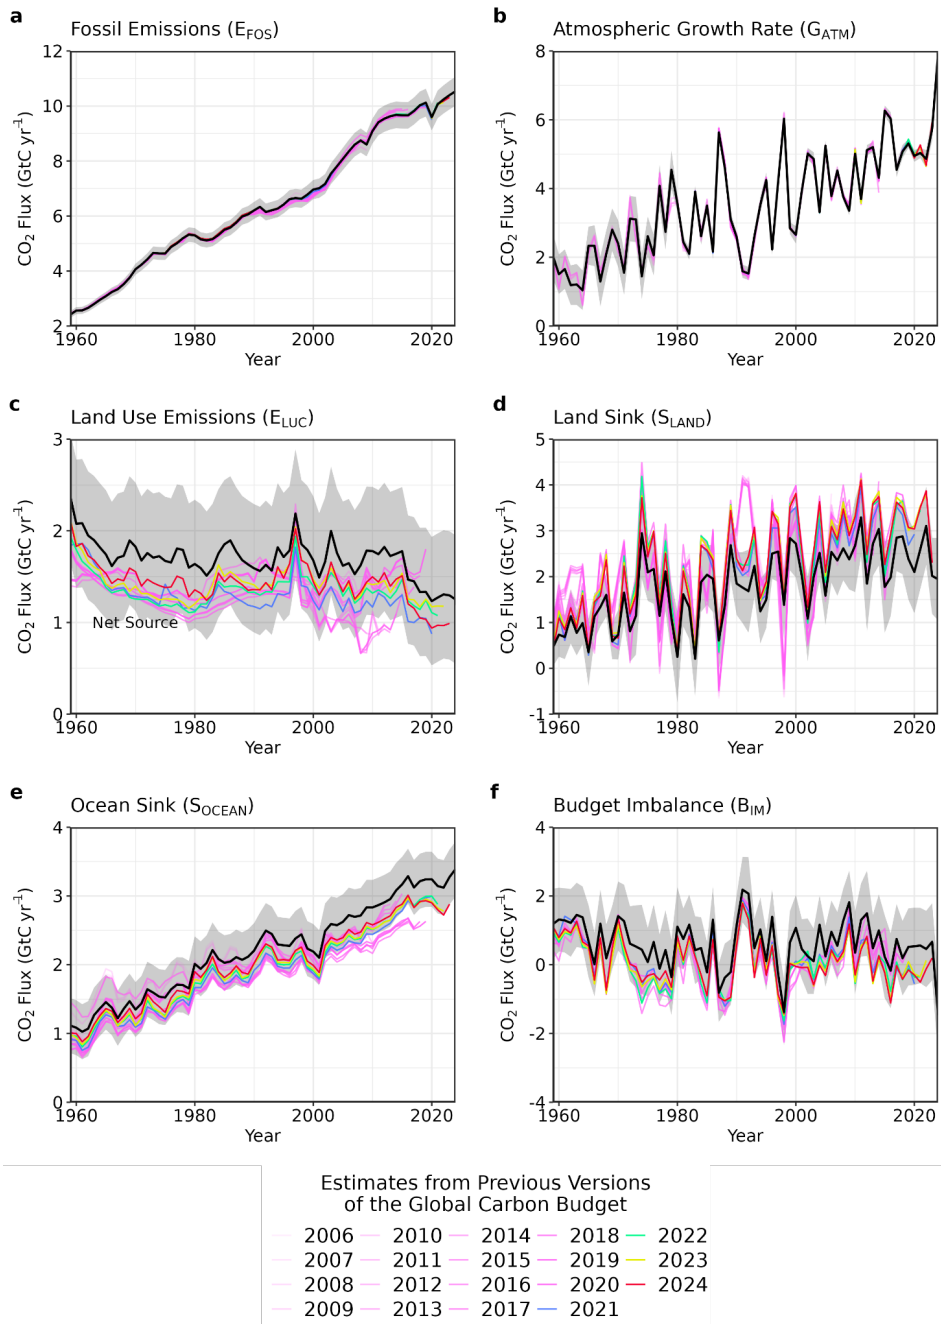

1284  
1285

1286 **Figure S15.** Comparison of the estimates of each component of the global carbon budget in this study (black  
1287 line) with the estimates released annually by the GCP since 2006. Grey shading shows the uncertainty bounds  
1288 representing  $\pm 1$  standard deviation of the current global carbon budget, based on the uncertainty assessments  
1289 described in Supplement S1 to S4. CO<sub>2</sub> emissions from (a) fossil CO<sub>2</sub> emissions excluding cement carbonation  
1290 ( $E_{FOS}$ ), and (b) land-use change ( $E_{LUC}$ ), as well as their partitioning among (c) the atmosphere ( $G_{ATM}$ ), (d) the  
1291 land ( $S_{LAND}$ ), and (e) the ocean ( $S_{OCEAN}$ ). See legend for the corresponding years, and Tables 3 and S10 for  
1292 description of changes in methodology. The budget year corresponds to the year when the budget was first  
1293 released. All values are in  $GtC\ yr^{-1}$ .  
1294

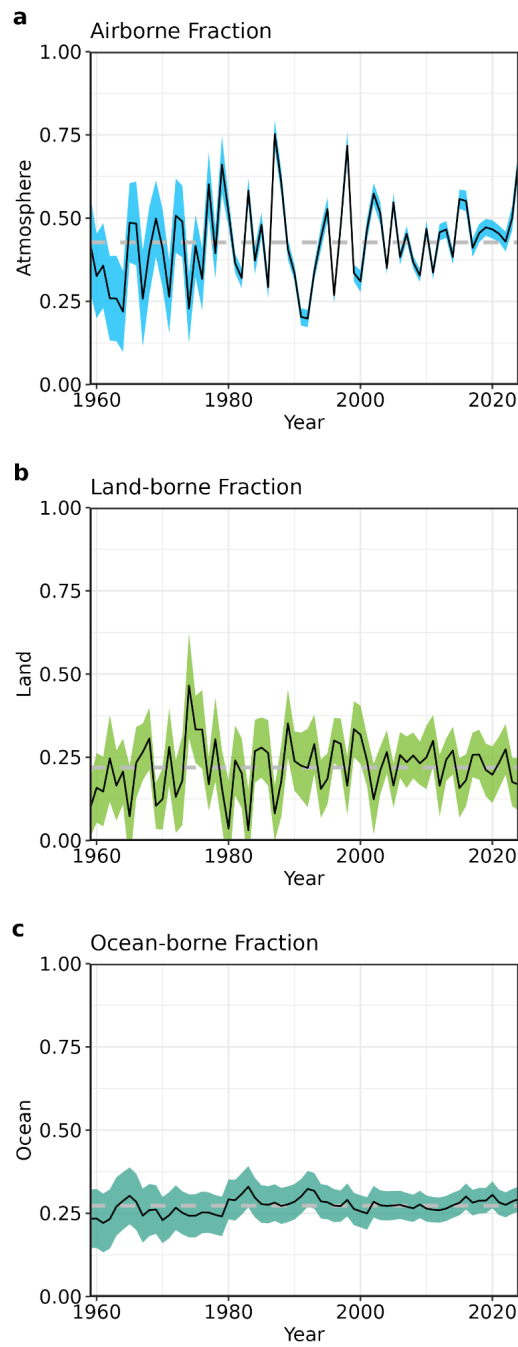

1295

1296 **Figure S16.** The partitioning of total anthropogenic CO<sub>2</sub> emissions ( $E_{FOS} + E_{LUC}$ ) across (a) the atmosphere  
 1297 (airborne fraction), (b) land (land-borne fraction), and (c) ocean (ocean-borne fraction). Black lines represent the  
 1298 central estimate, and the coloured shading represents the uncertainty. The grey dashed lines represent the long-  
 1299 term average of the airborne (44%), land-borne (23%) and ocean-borne (27%) fractions during 1959-2024 (with  
 1300 a  $B_{IM}$  of 6%).

1301

1302

1303

1304

1305  
1306

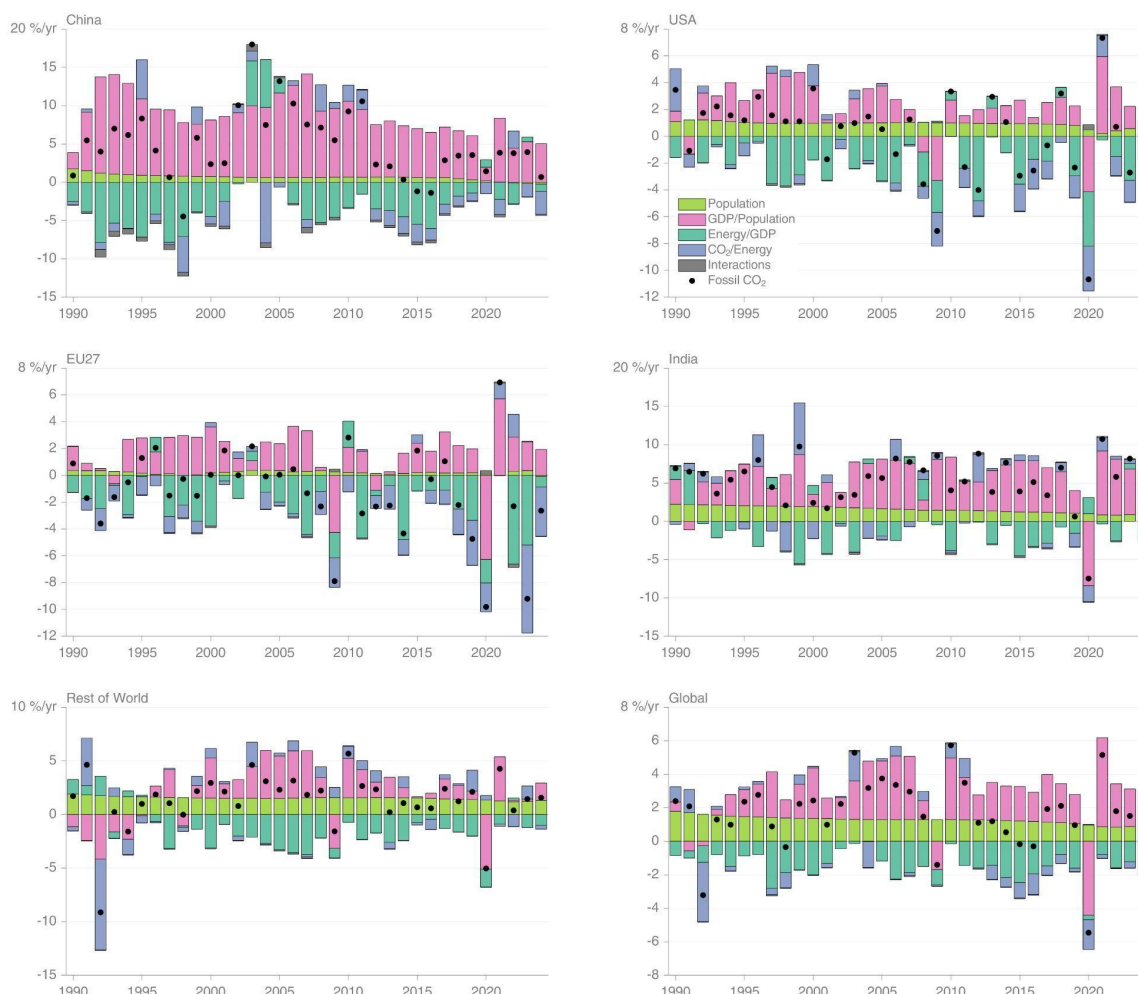

1307  
1308  
1309  
1310  
1311  
1312  
1313  
1314  
1315  
1316

**Figure S17.** Kaya decomposition of the main drivers of fossil CO<sub>2</sub> emissions, considering population, GDP per person, Energy per GDP, and CO<sub>2</sub> emissions per energy, for China (top left), USA (top right), EU27 (middle left), India (middle right), Rest of the World (bottom left), and World (bottom right). Black dots are the annual fossil CO<sub>2</sub> emissions growth rate, coloured bars are the contributions from the different drivers to this growth rate. A general trend is that population and GDP growth put upward pressure on emissions (positive values), while energy per GDP and, more recently, CO<sub>2</sub> emissions per energy put downward pressure on emissions (negative values).

1317 **Additional references**

- 1318 Adler, R. F., Huffman, G. J., Chang, A., Ferraro, R., Xie, P.-P., Janowiak, J., Rudolf, B., Schneider, U., Curtis, S., Bolvin,  
1319 D., Gruber, A., Susskind, J., Arkin, P., and Nelkin, E.: The Version-2 Global Precipitation Climatology Project (GPCP)  
1320 Monthly Precipitation Analysis (1979–Present), *J. Hydrometeorol.*, 4, 1147–1167, [https://doi.org/10.1175/1525-7541\(2003\)004<1147:TVGPCP>2.0.CO;2](https://doi.org/10.1175/1525-7541(2003)004<1147:TVGPCP>2.0.CO;2), 2003.
- 1322 Alemohammad, S. H., Fang, B., Konings, A. G., Aires, F., Green, J. K., Kolassa, J., Miralles, D., Prigent, C., and Gentine,  
1323 P.: Water, Energy, and Carbon with Artificial Neural Networks (WECANN): a statistically based estimate of global surface  
1324 turbulent fluxes and gross primary productivity using solar-induced fluorescence, *Biogeosciences*, 14, 4101–4124,  
1325 <https://doi.org/10.5194/bg-14-4101-2017>, 2017.
- 1326 Alkama, R.: Land Carbon Budget: Intact and Non-Intact Forest NBP from TRENDY-v11 S2 simulations [code], available  
1327 at: [https://github.com/RamAlkama/LandCarbonBudget\\_IntactAndNonIntactForest](https://github.com/RamAlkama/LandCarbonBudget_IntactAndNonIntactForest), last access: 21 January 2025, 2022.
- 1328 Amador-Jiménez, M., Millner, N., Palmer, C., Pennington, R. T., and Sileci, L.: The Unintended Impact of Colombia’s  
1329 Covid-19 Lockdown on Forest Fires, *Environ Resource Econ.*, 76, 1081–1105, <https://doi.org/10.1007/s10640-020-00501-5>,  
1330 2020.
- 1331 Amante, C. and Eakins, B. W.: ETOPO1 Global Relief Model converted to PanMap layer format, PANGAEA [dataset],  
1332 <https://doi.org/10.1594/PANGAEA.769615>, 2009.
- 1333 Andres, R. J., Boden, T. A., Bréon, F.-M., Ciais, P., Davis, S., Erickson, D., Gregg, J. S., Jacobson, A., Marland, G., Miller,  
1334 J., Oda, T., Olivier, J. G. J., Raupach, M. R., Rayner, P., and Treanton, K.: A synthesis of carbon dioxide emissions from  
1335 fossil-fuel combustion, *Biogeosciences*, 9, 1845–1871, <https://doi.org/10.5194/bg-9-1845-2012>, 2012.
- 1336 Andres, R. J., Boden, T. A., and Higdon, D.: A new evaluation of the uncertainty associated with CDIAC estimates of fossil  
1337 fuel carbon dioxide emission, *Tellus B: Chemical and Physical Meteorology*, 66, 23616,  
1338 <https://doi.org/10.3402/tellusb.v66.23616>, 2014.
- 1339 Andrew, R. M.: Towards near real-time, monthly fossil CO<sub>2</sub> emissions estimates for the European Union with current-year  
1340 projections, *Atmos. Pollut. Res.*, 12, 12, 101229, <https://doi.org/10.1016/j.apr.2021.101229>, 2021.
- 1341 Andrew, R. M. and Peters, G. P.: A multi-region input–output table based on the global trade analysis project database  
1342 (GTAP-MRIO), *Economic Systems Research*, 25, 99–121, <https://doi.org/10.1080/09535314.2012.761953>, 2013.
- 1343 Arora, V. K., Boer, G. J., Christian, J. R., Curry, C. L., Denman, K. L., Zahariev, K., Flato, G. M., Scinocca, J. F.,  
1344 Merryfield, W. J., and Lee, W. G.: The Effect of Terrestrial Photosynthesis Down Regulation on the Twentieth-Century  
1345 Carbon Budget Simulated with the CCCma Earth System Model, 22, 6066–6088, <https://doi.org/10.1175/2009JCLI3037.1>,  
1346 2009.
- 1347 Arora, V. K. and Scinocca, J. F.: Constraining the strength of the terrestrial CO<sub>2</sub> fertilization effect in the Canadian Earth  
1348 system model version 4.2 (CanESM4.2), *Geosci. Model Dev.*, 9, 2357–2376, <https://doi.org/10.5194/gmd-9-2357-2016>,  
1349 2016.
- 1350 Bakker, D. C. E., Pfeil, B., Landa, C. S., Metzl, N., O’Brien, K. M., Olsen, A., Smith, K., Cosca, C., Harasawa, S., Jones, S.  
1351 D., Nakaoka, S., Nojiri, Y., Schuster, U., Steinhoff, T., Sweeney, C., Takahashi, T., Tilbrook, B., Wada, C., Wanninkhof, R.,  
1352 Alin, S. R., Balestrini, C. F., Barbero, L., Bates, N. R., Bianchi, A. A., Bonou, F., Boutin, J., Bozec, Y., Burger, E. F., Cai,  
1353 W.-J., Castle, R. D., Chen, L., Chierici, M., Currie, K., Evans, W., Featherstone, C., Feely, R. A., Fransson, A., Goyet, C.,  
1354 Greenwood, N., Gregor, L., Hankin, S., Hardman-Mountford, N. J., Harlay, J., Hauck, J., Hoppema, M., Humphreys, M. P.,  
1355 Hunt, C. W., Huss, B., Ibáñez, J. S. P., Johannessen, T., Keeling, R., Kitidis, V., Körtzinger, A., Kozyr, A., Krasakopoulou,  
1356 E., Kuwata, A., Landschützer, P., Lauvset, S. K., Lefèvre, N., Lo Monaco, C., Manke, A., Mathis, J. T., Merlivat, L.,  
1357 Millero, F. J., Monteiro, P. M. S., Munro, D. R., Murata, A., Newberger, T., Omar, A. M., Ono, T., Paterson, K., Pearce, D.,  
1358 Pierrot, D., Robbins, L. L., Saito, S., Salisbury, J., Schlitzer, R., Schneider, B., Schweitzer, R., Sieger, R., Skjelvan, I.,  
1359 Sullivan, K. F., Sutherland, S. C., Sutton, A. J., Tadokoro, K., Telszewski, M., Tuma, M., van Heuven, S. M. A. C.,  
1360 Vandemark, D., Ward, B., Watson, A. J., and Xu, S.: A multi-decade record of high-quality CO<sub>2</sub> data in version 3 of the  
1361 Surface Ocean CO<sub>2</sub> Atlas (SOCAT), *Earth Syst. Sci. Data*, 8, 383–413, <https://doi.org/10.5194/essd-8-383-2016>, 2016.
- 1362 Bakker, D. C. E., Alin, S. R., Aramaki, T., Barbero, L., Bates, N. R., Gkritzalis, T., Jones, S. D., Kozyr, A., Lauvset, S. K.,  
1363 Macovei, V., Metzl, N., Munro, D. R., Nakaoka, S.-i., O’Brien, K. M., Olsen, A., Pierrot, D., Steinhoff, T., Sullivan, K. F.,  
1364 Sutton, A. J., Sweeney, C., Wada, C., Wanninkhof, R., Akl, J., Arbilla, L. A., Azetsu-Scott, K., Battisti, R., Beatty, C. M.,  
1365 Becker, M., Benoit-Cattin, A., Berghoff, C. F., Bittig, H. C., Bonin, J. A., Bott, R., Bozzano, R., Burger, E. F., Brunetti, F.,  
1366 Cantoni, C., Castelli, G., Chambers, D. P., Chierici, M., Corbo, A., Cronin, M., Cross, J. N., Currie, K. I., Denticco, C.,  
1367 Emerson, S. R., Enochs, I., Enright, M. P., Enyo, K., Ericson, Y., Evans, W., Fay, A. R., Feely, R. A., Fragiakomo, E.,  
1368 Fransson, A., Gehrung, M., Gianni, M., Glockzin, M., Hamna, S., Holodkov, N., Hoppema, M., Ibáñez, J. S. P., Kadono,  
1369 K., Kamb, L., Kralj, M., Kristensin, T. O., Laudicella, V. A., Lefèvre, N., Leseurre, C., Lo Monaco, C., Maenner Jones, S.  
1370 M., Maenza, R. A., McAuliffe, A. M., Mdokwana, B. W., Monacci, N. M., Musielewicz, S., Neill, C., Newberger, T., Nojiri,

- 1371 Y., Ohman, M. D., Ólafsdóttir, S. R., Olivier, L., Omar, A., Osborne, J., Pensieri, S., Petersen, W., Plueddemann, A. J.,  
1372 Rehder, G., Roden, N. P., Rutgersson, A., Sallée, J.-B., Sanders, R., Sarpe, D., Schirnik, C., Schlitzer, R., Send, U., Skjelvan,  
1373 I., Sutherland, S., C., T’Jampens, M., Tamsitt, V., Telszewski, M., Theetaert, H., Tilbrook, B., Trull, T., Tsanwani, M., Van  
1374 de Velde, S., Van Heuven, S. M. A. C., Vecchia, M. H., Voynova, Y. G., Weller, R. A., Williams, N. L.: Surface Ocean CO<sub>2</sub>  
1375 Atlas Database Version 2025 (SOCATv2025) (NCEI Accession 0304549), NOAA National Centers for Environmental  
1376 Information, Dataset, <https://doi.org/10.25921/648f-fv35>, 2025a.
- 1377 Bauer, J. E., Cai, W.-J., Raymond, P. A., Bianchi, T. S., Hopkinson, C. S., and Regnier, P. A. G.: The changing carbon cycle  
1378 of the coastal ocean, *Nature*, 504, 61–70, <https://doi.org/10.1038/nature12857>, 2013.
- 1379 Beckman, J. and Countryman, A. M.: The Importance of Agriculture in the Economy: Impacts from COVID-19, *Am. J. Agr.*  
1380 *Econ.*, 103, 1595–1611, <https://doi.org/10.1111/ajae.12212>, 2021.
- 1381 Bellouin, N., Rae, J., Jones, A., Johnson, C., Haywood, J., and Boucher, O.: Aerosol forcing in the Climate Model  
1382 Intercomparison Project (CMIP5) simulations by HadGEM2-ES and the role of ammonium nitrate, *J. Geophys. Res.-Atmos.*,  
1383 116, D20206, <https://doi.org/10.1029/2011JD016074>, 2011.
- 1384 Bernardello, R., Sicardi, V., Lapin, V., Ortega, P., Ruprich-Robert, Y., Tourigny, E., and Ferrer, E.: Ocean biogeochemical  
1385 reconstructions to estimate historical ocean CO<sub>2</sub> uptake, *Earth Syst. Dynam.*, 15, 1255–1275, <https://doi.org/10.5194/esd-15-1255-2024>, 2024.
- 1387 Bethke, I., Wang, Y., Counillon, F., Keenlyside, N., Kimmritz, M., Fransner, F., ... & Eldevik, T.: NorCPM1 and its  
1388 contribution to CMIP6 DCP. *Geoscientific Model Development*, 14(11), 7073-7116, 2021.
- 1389 Bilbao, R., S. Wild, P. Ortega et al. (2021). Assessment of a full-field initialised decadal climate prediction system with the  
1390 CMIP6 version of EC-Earth. *Earth Systems Dynamics*, doi:10.5194/esd-2020-66. Broecker, W. S.: Ocean chemistry during  
1391 glacial time, *Geochimica et Cosmochimica Acta*, 46, 1689–1705, [https://doi.org/10.1016/0016-7037\(82\)90110-7](https://doi.org/10.1016/0016-7037(82)90110-7), 1982.
- 1392 Boucher O., Servonnat, J., Albright, A. L., Aumont, O., Balkanski, Y., Bastrikov, V., et al.: Presentation and evaluation of the  
1393 IPSL-CM6A-LR climate model. *Journal of Advances in Modeling Earth Systems*, 12, e2019MS002010, 2020.
- 1394 Brune, S., A. Düsterhus, H. Pohlmann, W. A. Müller, and J. Baehr: Time dependency of the prediction skill for the north  
1395 atlantic subpolar gyre in initialized decadal hindcasts. *Climate dynamics*, 51 (5), 1947–1970, 2018.
- 1396 Brunner, L., Pendergrass, A. G., Lehner, F., Merrifield, A. L., Lorenz, R., and Knutti, R.: Reduced global warming from  
1397 CMIP6 projections when weighting models by performance and independence, *Earth Syst. Dynam.*, 11, 995–1012,  
1398 <https://doi.org/10.5194/esd-11-995-2020>, 2020.
- 1399 Cerdeiro, D.A., Komaromi, A., Liu, Y., Saeed, M.: World Seaborne Trade in Real Time: A Proof of Concept for Building  
1400 AIS-based Nowcasts from Scratch. International Monetary Fund (IMF) WP/20/57, available at:  
1401 <https://www.imf.org/en/Publications/WP/Issues/2020/05/14/World-Seaborne-Trade-in-Real-Time-A-Proof-of-Concept-for-Building-AIS-based-Nowcasts-from-49393>, last access: 21 January 2025, 2020.
- 1403 Chatfield, C.: The Holt-Winters Forecasting Procedure, *J. Roy. Stat. Soc. C.*, 27, 264–279, <https://doi.org/10.2307/2347162>,  
1404 1978.
- 1405 Chen, Y., Hall, J., van Wees, D., Andela, N., Hantson, S., Giglio, L., van der Werf, G.R., Morton, D.C., and Randerson, J.T.  
1406 (2023) Multi-decadal trends and variability in burned area from the fifth version of the Global Fire Emissions Database  
1407 (GFED5). *ESSD* 15(11), 5227–5259 <https://doi.org/10.5194/essd-15-5227-2023>
- 1408 Chini, L., Hurtt, G., Sahajpal, R., Frohking, S., Klein Goldewijk, K., Sitch, S., Ganzenmüller, R., Ma, L., Ott, L., Pongratz,  
1409 J., and Poulter, B.: Land-use harmonization datasets for annual global carbon budgets, 13, 4175–4189,  
1410 <https://doi.org/10.5194/essd-13-4175-2021>, 2021.
- 1411 Clarke, D., Flachenecker, F., Guidetti, E., and Pionnier, P.-A.: CO<sub>2</sub> Emissions from air transport: A near-real-time global  
1412 database for policy analysis, Organization for Economic Co-operation and Development, Paris OECD Statistics Working  
1413 Papers 2022/04, available at: <https://doi.org/10.1787/ecc9f16b-en>, last access: 21 January 2025, 2022.
- 1414 Clarke, D., Chan P., Dequeljoe, M., Kim, Y., and Barahona, S.: CO<sub>2</sub> emissions from global shipping: A new experimental  
1415 database”, OECD Statistics Working Papers, No. 2023/04, OECD Publishing, Paris, <https://doi.org/10.1787/bc2f7599-en>,  
1416 2023
- 1417 Claverie, M., Matthews, J., Vermote, E., and Justice, C.: A 30+ Year AVHRR LAI and FAPAR Climate Data Record:  
1418 Algorithm Description and Validation, *Remote Sensing*, 8, 263, <https://doi.org/10.3390/rs8030263>, 2016.
- 1419 Collier, N., Hoffman, F. M., Lawrence, D. M., Keppel-Aleks, G., Koven, C. D., Riley, W. J., et al. (2018). The International  
1420 Land Model Benchmarking (ILAMB) system: Design, theory, and implementation. *Journal of Advances in Modeling Earth*  
1421 *Systems*, 10, 2731–2754. <https://doi.org/10.1029/2018MS001354>

- 1422 Conchedda, G. and Tubiello, F. N.: Drainage of organic soils and GHG emissions: Validation with country data, *Biosphere –*  
1423 *Biogeosciences*, <https://doi.org/10.5194/essd-2020-202>, 2020.
- 1424 Cooper, D. J., Watson, A. J., and Ling, R. D.: Variation of pCO<sub>2</sub> along a North Atlantic shipping route (U.K. to the  
1425 Caribbean): A year of automated observations, *Marine Chemistry*, 60, 147-164, 1998.
- 1426 Crippa, M., Janssens-Maenhout, G., Guizzardi, D., Van Dingenen, R., and Dentener, F.: Contribution and uncertainty of  
1427 sectorial and regional emissions to regional and global PM<sub>2.5</sub> health impacts, 19, 5165–5186, [https://doi.org/10.5194/acp-](https://doi.org/10.5194/acp-19-5165-2019)  
1428 [19-5165-2019](https://doi.org/10.5194/acp-19-5165-2019), 2019.
- 1429 Dai, A. and Trenberth, K. E.: Estimates of Freshwater Discharge from Continents: Latitudinal and Seasonal Variations, *J.*  
1430 *Hydrometeorol.*, 3, 660–687, [https://doi.org/10.1175/1525-7541\(2002\)003<0660:EOFDfC>2.0.CO;2](https://doi.org/10.1175/1525-7541(2002)003<0660:EOFDfC>2.0.CO;2), 2002.
- 1431 Davis, S. J. and Caldeira, K.: Consumption-based accounting of CO<sub>2</sub> emissions, *Proceedings of the National Academy of*  
1432 *Sciences*, 107, 5687–5692, <https://doi.org/10.1073/pnas.0906974107>, 2010.
- 1433 de Boyer Montégut, C., G. Madec, A. S. Fischer, A. Lazar, and D. Iudicone (2004), Mixed layer depth over the global ocean:  
1434 An examination of profile data and a profile-based climatology, *J. Geophys. Res.*, 109, C12003, doi:10.1029/2004JC002378.
- 1435 de Boyer Montégut Clément (2023). Mixed layer depth climatology computed with a density threshold criterion of  
1436 0.03kg/m<sup>3</sup> from 10 m depth value. SEANOE. <https://doi.org/10.17882/91774>
- 1437 De Kauwe, M. G., Disney, M. I., Quaife, T., Lewis, P., and Williams, M.: An assessment of the MODIS collection 5 leaf  
1438 area index product for a region of mixed coniferous forest, *Remote Sensing of Environment*, 115, 767–780,  
1439 <https://doi.org/10.1016/j.rse.2010.11.004>, 2011.
- 1440 Dee, D. P., Uppala, S. M., Simmons, A. J., Berrisford, P., Poli, P., Kobayashi, S., ... & Vitart, F.: The ERA-Interim  
1441 reanalysis: Configuration and performance of the data assimilation system. *Quarterly Journal of the royal meteorological*  
1442 *society*, 137(656), 553-597, 2011.
- 1443 DeVries, T. (2014), The oceanic anthropogenic CO<sub>2</sub> sink: Storage, air-sea fluxes, and transports over the industrial era,  
1444 *Global Biogeochem. Cycles*, 28, 631–647, doi:10.1002/2013GB004739.
- 1445 Dickson, A. G., Sabine, C. L., and Christian, J. R.: Guide to best practices for ocean CO<sub>2</sub> measurement. Sidney, British  
1446 Columbia, North Pacific Marine Science Organization, 191pp. (PICES Special Publication 3; IOCCP Report 8). DOI:  
1447 <https://doi.org/10.25607/OBP-1342>, 2007.
- 1448 Dlugokencky, E. J., Lang, P. M., Masarie, K., Crotwell, A. M., and Crotwell, M. J.: Atmospheric carbon dioxide dry air  
1449 mole fractions from the NOAA ESRL carbon cycle cooperative global air sampling network, 1968–2012, Version: 2013-08-  
1450 27, available at: [ftp://aftp.cmdl.noaa.gov/data/trace\\_gases/co2/flask/surface/](ftp://aftp.cmdl.noaa.gov/data/trace_gases/co2/flask/surface/), 2013.
- 1451 Dou, X., Wang, Y., Ciais, P., Chevallier, F., Davis, S. J., Crippa, M., Janssens-Maenhout, G., Guizzardi, D., Solazzo, E.,  
1452 Yan, F., Huo, D., Zheng, B., Zhu, B., Cui, D., Ke, P., Sun, T., Wang, H., Zhang, Q., Gentine, P., Deng, Z., and Liu, Z.: Near-  
1453 real-time global gridded daily CO<sub>2</sub> emissions, *The Innovation*, 3, 100182, <https://doi.org/10.1016/j.xinn.2021.100182>, 2022.
- 1454 Döscher, R., Acosta, M., Alessandri, A., Anthoni, P., Arneth, A., Arsouze, T., ... & Zhang, Q.: The EC-earth3 Earth system  
1455 model for the climate model intercomparison project 6. *Geoscientific Model Development Discussions*, 2021, 1-90. 2021.
- 1456 Duce, R. A., LaRoche, J., Altieri, K., Arrigo, K. R., Baker, A. R., Capone, D. G., Cornell, S., Dentener, F., Galloway, J.,  
1457 Ganeshram, R. S., Geider, R. J., Jickells, T., Kuypers, M. M., Langlois, R., Liss, P. S., Liu, S. M., Middelburg, J. J., Moore,  
1458 C. M., Nickovic, S., Oschlies, A., Pedersen, T., Prospero, J., Schlitzer, R., Seitzinger, S., Sorensen, L. L., Uematsu, M.,  
1459 Ulloa, O., Voss, M., Ward, B., and Zamora, L.: Impacts of Atmospheric Anthropogenic Nitrogen on the Open Ocean,  
1460 *Science*, 320, 893–897, <https://doi.org/10.1126/science.1150369>, 2008.
- 1461 Eakins, B. W. and Sharman, G. F.: National Geophysical Data Center: Volumes of the World’s Oceans from ETOPO1,  
1462 available at: [https://www.ngdc.noaa.gov/mgg/global/etopo1\\_ocean\\_volumes.html](https://www.ngdc.noaa.gov/mgg/global/etopo1_ocean_volumes.html), last access: 21 January 2025, U.S.  
1463 Department of Commerce, 2010.
- 1464 Eurostat: Countries 2020, 1:1 million, available at: [https://ec.europa.eu/eurostat/web/gisco/geodata/reference-](https://ec.europa.eu/eurostat/web/gisco/geodata/reference-data/administrative-units-statistical-units/countries)  
1465 [data/administrative-units-statistical-units/countries](https://ec.europa.eu/eurostat/web/gisco/geodata/reference-data/administrative-units-statistical-units/countries), last access: 21 January 2025, 2024.
- 1466 Eyring, V., Bony, S., Meehl, G. A., Senior, C. A., Stevens, B., Stouffer, R. J., and Taylor, K. E.: Overview of the Coupled  
1467 Model Intercomparison Project Phase 6 (CMIP6) experimental design and organization, *Geosci. Model Dev.*, 9, 1937–1958,  
1468 <https://doi.org/10.5194/gmd-9-1937-2016>, 2016.
- 1469 EIA: U.S. Energy Information Administration: Short-Term Energy Outlook, available at:  
1470 <http://www.eia.gov/forecasts/steo/outlook>, last access: 21 January 2025, 2023.

- 1471 FAO: Global Forest Resources Assessment 2020: Main report, FAO, Rome, Italy, 184 pp., <https://doi.org/10.4060/ca9825en>,  
1472 2020.
- 1473 FAO: FAO Statistical Database (FAOSTAT), domains Climate Change, available at:  
1474 <http://www.fao.org/faostat/en/#data/GT>, last access: 21 January 2025, 2021.
- 1475 FAO: Land statistics 2001–2023 – Global, regional and country trends. FAOSTAT Analytical Briefs, No.107. Rome.  
1476 <https://doi.org/10.4060/cd5765en>, 2025a.
- 1477 FAO: FAOSTAT Emissions from Drained organic soils, available at <http://www.fao.org/faostat/en/#data/GV>, last access: 23  
1478 October 2025, 2025b.
- 1479 FAO: FAOSTAT Emissions totals database, available at <https://faostat.fao.org/internal/en/#data/GT>, last access: 23 October  
1480 2025, FAO2025c.
- 1481 FAO/UNEP: Food and Agriculture Organisation / United Nations Environment Programme: The state of food and  
1482 agriculture 1981, available at: <https://www.fao.org/3/ap661e/ap661e.pdf>, last access: 21 January 2025, 1981.
- 1483 Fay, A. R., Heimdal, T. H., Acquaviva, V., Shaum, A. P., McKinley, G. A. (2025) Sensitivity of ocean carbon sink estimates  
1484 to rare observations. *Geophysical Research Letters* 52, e2025GL117961. doi:10.1029/2025GL117961.
- 1485 Fay, A. R. and McKinley, G. A.: Global open-ocean biomes: mean and temporal variability, *ESSD* 6, 273–284,  
1486 <https://doi.org/10.5194/essd-6-273-2014>, 2014.
- 1487 Fischer, G., Nachtergaele, F., Prieler, S., van Velthuizen, H. T., Verelst, L., and Wiberg, D.: Global Agro-ecological Zones  
1488 Assessment for Agriculture (GAEZ 2008). IIASA, Laxenburg, Austria and FAO, Rome, Italy, available at:  
1489 <https://www.fao.org/soils-portal/data-hub/soil-maps-and-databases/harmonized-world-soil-database-v12/land-cover-data/ar/>,  
1490 last access: 21 January 2025, 2008.
- 1491 Ford, D. J., Blannin, J., Watts, J., Watson, A. J., Landschützer, P., Jersild, A. and Shutler, J. D.: A comprehensive analysis of  
1492 air-sea CO<sub>2</sub> flux uncertainties constructed from surface ocean data products, *Global Biogeochemical Cycles*, 38,  
1493 e2024GB008188, doi: 10.1029/2024GB008188., 2024
- 1494 Ford, D.J., Shutler, J.D., Blanco-Sacristán, J. et al. Enhanced ocean CO<sub>2</sub> uptake due to near-surface temperature gradients.  
1495 *Nat. Geosci.* 17, 1135–1140 . <https://doi.org/10.1038/s41561-024-01570-7>, 2024a
- 1496 Ford, D. J., Shutler, J. D., Ashton, I., Sims, R. P., & Holding, T. (2025). Recalculated (depth and temperature consistent)  
1497 surface ocean CO<sub>2</sub> atlas (SOCAT) version 2025 (v0-1) [Data set]. Zenodo. <https://doi.org/10.5281/zenodo.15656803>
- 1498 Fu, W., Moore, J. K., Primeau, F., Collier, N., Ogunro, O. O., Hoffman, F. M., & Randerson, J. T. (2022). Evaluation of  
1499 ocean biogeochemistry and carbon cycling in CMIP earth system models with the International Ocean Model Benchmarking  
1500 (IOMB) software system. *Journal of Geophysical Research: Oceans*, 127, e2022JC018965.  
1501 <https://doi.org/10.1029/2022JC018965>
- 1502 Gasser, T. and Ciais, P.: A theoretical framework for the net land-to-atmosphere CO<sub>2</sub> flux and its implications in the  
1503 definition of "emissions from land-use change", *Earth Syst. Dynam.*, 4, 171–186, <https://doi.org/10.5194/esd-4-171-2013>,  
1504 2013.
- 1505 GCCA. Concrete Future: The GCCA 2050 Cement and Concrete Industry Roadmap for Net Zero Concrete, available at:  
1506 <https://gccassociation.org/concretefuture/> last access: 2 August 2022, 2021.
- 1507 Gkritzalis, T., Bakker, D. C. E., Lauvset, S. K. and Steinhoff, T. (2024) SOCAT Quality Control Cookbook – For version  
1508 2025 of the Surface Ocean CO<sub>2</sub> Atlas. 26 pp. Published on 18/12/2024. Available here: [https://socat.info/wp-](https://socat.info/wp-content/uploads/2025/01/2024_SOCAT_QC_Cookbook_Update.pdf)  
1509 [content/uploads/2025/01/2024\\_SOCAT\\_QC\\_Cookbook\\_Update.pdf](https://socat.info/wp-content/uploads/2025/01/2024_SOCAT_QC_Cookbook_Update.pdf). Last access 22/05/2025.
- 1510 Goddijn-Murphy, L. M., Woolf, D. K., Land, P. E., Shutler, J. D., and Donlon, C.: The OceanFlux Greenhouse Gases  
1511 methodology for deriving a sea surface climatology of CO<sub>2</sub> fugacity in support of air–sea gas flux studies, 11, 519–541,  
1512 <https://doi.org/10.5194/os-11-519-2015>, 2015.
- 1513 Golar, G., Malik, A., Muis, H., Herman, A., Nurudin, N., and Lukman, L.: The social-economic impact of COVID-19  
1514 pandemic: implications for potential forest degradation, *Heliyon*, 6, e05354, <https://doi.org/10.1016/j.heliyon.2020.e05354>,  
1515 2020.
- 1516 Good, S. A., Martin, M. J., and Rayner, N. A.: EN4: Quality controlled ocean temperature and salinity profiles and monthly  
1517 objective analyses with uncertainty estimates, *Journal of Geophysical Research: Oceans*, 118, 6704–6716,  
1518 <https://doi.org/10.1002/2013JC009067>, 2013.

- 1519 Gouretski, V. and Cheng, L.: Correction for Systematic Errors in the Global Dataset of Temperature Profiles from  
1520 Mechanical Bathythermographs, *Journal of Atmospheric and Oceanic Technology*, 37, 841–855,  
1521 <https://doi.org/10.1175/JTECH-D-19-0205.1>, 2020.
- 1522 Gouretski, V. and Reseghetti, F.: On depth and temperature biases in bathythermograph data: Development of a new  
1523 correction scheme based on analysis of a global ocean database, *Deep Sea Research Part I: Oceanographic Research Papers*,  
1524 57, 812–833, <https://doi.org/10.1016/j.dsr.2010.03.011>, 2010.
- 1525 Grassi, G., House, J., Kurz, W. A., Cescatti, A., Houghton, R. A., Peters, G. P., Sanz, M. J., Viñas, R. A., Alkama, R.,  
1526 Arneth, A., Bondeau, A., Dentener, F., Fader, M., Federici, S., Friedlingstein, P., Jain, A. K., Kato, E., Koven, C. D., Lee,  
1527 D., Nabel, J. E. M. S., Nassikas, A. A., Perugini, L., Rossi, S., Sitch, S., Viovy, N., Wiltshire, A., and Zaehle, S.:  
1528 Reconciling global-model estimates and country reporting of anthropogenic forest CO<sub>2</sub> sinks, *Nature Clim Change*, 8, 914–  
1529 920, <https://doi.org/10.1038/s41558-018-0283-x>, 2018.
- 1530 Grassi, G., Stehfest, E., Rogelj, J., van Vuuren, D., Cescatti, A., House, J., Nabuurs, G.-J., Rossi, S., Alkama, R., Viñas, R.  
1531 A., Calvin, K., Ceccherini, G., Federici, S., Fujimori, S., Gusti, M., Hasegawa, T., Havlik, P., Humpenöder, F., Korosuo, A.,  
1532 Perugini, L., Tubiello, F. N., and Popp, A.: Critical adjustment of land mitigation pathways for assessing countries' climate  
1533 progress, *Nat. Clim. Chang.*, 11, 425–434, <https://doi.org/10.1038/s41558-021-01033-6>, 2021.
- 1534 Grassi, G., Conchedda, G., Federici, S., Abad Viñas, R., Korosuo, A., Melo, J., Rossi, S., Sandker, M., Somogyi, Z., and  
1535 Tubiello, F. N.: Carbon fluxes from land 2000–2020: bringing clarity on countries' reporting, *Biogeosciences and*  
1536 *biodiversity*, <https://doi.org/10.5194/essd-2022-104>, 2022.
- 1537 Grassi, G., Schwingshackl, C., Gasser, T., Houghton, R. A., Sitch, S., Canadell, J. G., Cescatti, A., Ciais, P., Federici, S.,  
1538 Friedlingstein, P., Kurz, W. A., Sanz Sanchez, M. J., Abad Viñas, R., Alkama, R., Bultan, S., Ceccherini, G., Falk, S., Kato,  
1539 E., Kennedy, D., Knauer, J., Korosuo, A., Melo, J., McGrath, M. J., Nabel, J. E. M. S., Poulter, B., Romanovskaya, A. A.,  
1540 Rossi, S., Tian, H., Walker, A. P., Yuan, W., Yue, X., and Pongratz, J.: Harmonising the land-use flux estimates of global  
1541 models and national inventories for 2000–2020, *Earth Syst. Sci. Data*, 15, 1093–1114, [https://doi.org/10.5194/essd-15-1093-](https://doi.org/10.5194/essd-15-1093-2023)  
1542 2023, 2023.
- 1543 Gregg, J. S., Andres, R. J., and Marland, G.: China: Emissions pattern of the world leader in CO<sub>2</sub> emissions from fossil fuel  
1544 consumption and cement production, *Geophys. Res. Lett.*, 35, L08806, <https://doi.org/10.1029/2007GL032887>, 2008.
- 1545 Gregor, Luke; Gruber, Nicolas (2020). OceanSODA-ETHZ: A global gridded dataset of the surface ocean carbonate system  
1546 for seasonal to decadal studies of ocean acidification (v2023) (NCEI Accession 0220059). [indicate subset used]. NOAA  
1547 National Centers for Environmental Information. Dataset. <https://doi.org/10.25921/m5wx-ja34>. Accessed 24 October 2025.
- 1548 Gürses, Ö., Oziel, L., Karakuş, O., Sidorenko, D., Völker, C., Ye, Y., Zeising, M., Butzin, M., and Hauck, J.: Ocean  
1549 biogeochemistry in the coupled ocean–sea ice–biogeochemistry model FESOM2.1–REcoM3, *Geoscientific Model*  
1550 *Development*, 16, 4883–4936, <https://doi.org/10.5194/gmd-16-4883-2023>, 2023.
- 1551 Hansen, M. C., Potapov, P. V., Moore, R., Hancher, M., Turubanova, S. A., Tyukavina, A., Thau, D., Stehman, S. V., Goetz,  
1552 S. J., Loveland, T. R., Kommareddy, A., Egorov, A., Chini, L., Justice, C. O., and Townshend, J. R. G.: High-Resolution  
1553 Global Maps of 21st-Century Forest Cover Change, *Science*, 342, 850–853, <https://doi.org/10.1126/science.1244693>, 2013.
- 1554 Harris, I., Jones, P. D., Osborn, T. J., and Lister, D. H.: Updated high-resolution grids of monthly climatic observations - the  
1555 CRU TS3.10 Dataset, *Int. J. Climatol.*, 34, 623–642, <https://doi.org/10.1002/joc.3711>, 2014.
- 1556 Harris, I., Osborn, T. J., Jones, P., and Lister, D.: Version 4 of the CRU TS monthly high-resolution gridded multivariate  
1557 climate dataset, *Sci Data*, 7, 109, <https://doi.org/10.1038/s41597-020-0453-3>, 2020.
- 1558 Hashimoto, S., Carvalhais, N., Ito, A., Migliavacca, M., Nishina, K. and Reichstein, M.: Global spatiotemporal distribution  
1559 of soil respiration modeled using a global database. *Biogeosciences*, 12(13), pp.4121-4132, 2015.
- 1560 Hashimoto, S., Ito, A. and Nishina, K.: Divergent data-driven estimates of global soil respiration. *Communications Earth &*  
1561 *Environment*, 4(1), p.460, 2023.
- 1562 Hefner, M., Marland, G., Boden, T., Andres, R.: Global, Regional, and National Fossil-Fuel CO<sub>2</sub> Emissions: 1751-2020  
1563 CDIAC-FF, Appalachian Energy Centre [data set], available at: <https://energy.appstate.edu/cdiac-appstate/data-products>, last  
1564 access: 21 January 2025, 2023.
- 1565 Heinimann, A., Mertz, O., Frohling, S., Christensen, A. E., Hurni, K., Sedano, F., Chini, L. P., Sahajpal, R., Hansen, M., and  
1566 Hurtt, G.: A global view of shifting cultivation: Recent, current, and future extent, *PLOS ONE*, 12, e0184479,  
1567 <https://doi.org/10.1371/journal.pone.0184479>, 2017.
- 1568 Hersbach, H., Bell, B., Berrisford, P., Hirahara, S., Horányi, A., Muñoz-Sabater, J., ... & Thépaut, J. N.: The ERA5 global  
1569 reanalysis. *Quarterly Journal of the Royal Meteorological Society*, 146(730), 1999-2049, 2020.

- 1570 Hertwich, E. G. and Peters, G. P.: Carbon Footprint of Nations: A Global, Trade-Linked Analysis, *Environ. Sci. Technol.*,  
1571 43, 6414–6420, <https://doi.org/10.1021/es803496a>, 2009.
- 1572 Ho, D. T., Wanninkhof, R., Schlosser, P., Ullman, D. S., Hebert, D., and Sullivan, K. F.: Toward a universal relationship  
1573 between wind speed and gas exchange: Gas transfer velocities measured with <sup>3</sup>He/SF<sub>6</sub> during the Southern Ocean Gas  
1574 Exchange Experiment, *J. Geophys. Res.-Oceans*, 116, C00F04, <https://doi.org/10.1029/2010JC006854>, 2011.
- 1575 Hobeichi, S., Abramowitz, G., Evans, J., and Beck, H. E.: Linear Optimal Runoff Aggregate (LORA): a global gridded  
1576 synthesis runoff product, *Hydrol. Earth Syst. Sci.*, 23, 851–870, <https://doi.org/10.5194/hess-23-851-2019>, 2019.
- 1577 Hobeichi, S., Abramowitz, G., and Evans, J.: Conserving Land–Atmosphere Synthesis Suite (CLASS), *Journal of Climate*,  
1578 33, 1821–1844, <https://doi.org/10.1175/JCLI-D-19-0036.1>, 2020.
- 1579 Houghton, R. A.: Why are estimates of the terrestrial carbon balance so different?, *Glob. Change Biol.*, 9, 500–509,  
1580 <https://doi.org/10.1046/j.1365-2486.2003.00620.x>, 2003.
- 1581 Houghton, R. A. and Nassikas, A. A.: Global and regional fluxes of carbon from land use and land cover change 1850–2015:  
1582 Carbon Emissions From Land Use, *Global Biogeochem. Cycles*, 31, 456–472, <https://doi.org/10.1002/2016GB005546>,  
1583 2017.
- 1584 Hauck, J., Gregor, L., Nissen, C., Patara, L., Hague, M., Mongwe, P., Bushinsky, S., Doney, S. C., Gruber, N., Le Quéré, C.,  
1585 Manizza, M., Mazloff, M., Monteiro, P. M. S., & Terhaar, J.: The Southern Ocean Carbon Cycle 1985–2018: Mean,  
1586 Seasonal Cycle, Trends, and Storage. *Global Biogeochemical Cycles*, 37(11), e2023GB007848.  
1587 <https://doi.org/10.1029/2023GB007848>, 2023b.
- 1588 Huang, Z., Wang, J., Bing, L., Qiu, Y., Guo, R., Yu, Y., Ma, M., Niu, L., Tong, D., Andrew, R. M., Friedlingstein, P.,  
1589 Canadell, J. G., Xi, F., and Liu, Z.: Global carbon uptake of cement carbonation accounts 1930–2021, *Earth Syst. Sci. Data*,  
1590 15, 4947–4958, <https://doi.org/10.5194/essd-15-4947-2023>, 2023.
- 1591 Hugelius, G., Bockheim, J. G., Camill, P., Elberling, B., Grosse, G., Harden, J. W., Johnson, K., Jorgenson, T., Koven, C.  
1592 D., Kuhry, P., Michaelson, G., Mishra, U., Palmtag, J., Ping, C.-L., O’Donnell, J., Schirmermeister, L., Schuur, E. A. G.,  
1593 Sheng, Y., Smith, L. C., Strauss, J., and Yu, Z.: A new data set for estimating organic carbon storage to 3 m depth in soils of  
1594 the northern circumpolar permafrost region, *Earth Syst. Sci. Data*, 5, 393–402, <https://doi.org/10.5194/essd-5-393-2013>,  
1595 2013.
- 1596 Hui, D., & Jackson, R. B. (2006). Geographical and interannual variability in biomass partitioning in grassland ecosystems:  
1597 a modeling analysis. *Proceedings of the National Academy of Sciences of the United States of America (PNAS)*, 103(39),  
1598 14271–14275. <https://doi.org/10.1073/pnas.0604342103>
- 1599 Humphreys, M. P., Lewis, E. R., Sharp, J. D., and Pierrot, D.: PyCO<sub>2</sub>SYS v1.8: marine carbonate system calculations in  
1600 Python, *Geosci. Model Dev.*, 15, 15–43, <https://doi.org/10.5194/gmd-15-15-2022>, 2022.
- 1601 Hurtt, G., Chini, L., Sahajpal, R., Frolking, S., Bodirsky, B. L., Calvin, K., Doelman, J., Fisk, J., Fujimori, S., Klein  
1602 Goldewijk, K., Hasegawa, T., Havlik, P., Heinemann, A., Humpenöder, F., Jungclaus, J., Kaplan, J., Krisztin, T., Lawrence,  
1603 D., Lawrence, P., Mertz, O., Pongratz, J., Popp, A., Riahi, K., Shevliakova, E., Stehfest, E., Thornton, P., van Vuuren, D.,  
1604 and Zhang, X.: input4MIPs.CMIP6.CMIP.UofMD.UofMD-landState-2-1-h, World Climate Research Programme [dataset],  
1605 <https://doi.org/10.22033/ESGF/input4MIPs.1127>, 2017.
- 1606 Hurtt, G. C., Chini, L. P., Frolking, S., Betts, R. A., Feddema, J., Fischer, G., Fisk, J. P., Hibbard, K., Houghton, R. A.,  
1607 Janetos, A., Jones, C. D., Kindermann, G., Kinoshita, T., Klein Goldewijk, K., Riahi, K., Shevliakova, E., Smith, S.,  
1608 Stehfest, E., Thomson, A., Thornton, P., van Vuuren, D. P., and Wang, Y. P.: Harmonization of land-use scenarios for the  
1609 period 1500–2100: 600 years of global gridded annual land-use transitions, wood harvest, and resulting secondary lands,  
1610 *Climatic Change*, 109, 117–161, <https://doi.org/10.1007/s10584-011-0153-2>, 2011.
- 1611 Hurtt, G. C., Chini, L., Sahajpal, R., Frolking, S., Bodirsky, B. L., Calvin, K., Doelman, J. C., Fisk, J., Fujimori, S., Klein  
1612 Goldewijk, K., Hasegawa, T., Havlik, P., Heinemann, A., Humpenöder, F., Jungclaus, J., Kaplan, J. O., Kennedy, J.,  
1613 Krisztin, T., Lawrence, D., Lawrence, P., Ma, L., Mertz, O., Pongratz, J., Popp, A., Poulter, B., Riahi, K., Shevliakova, E.,  
1614 Stehfest, E., Thornton, P., Tubiello, F. N., van Vuuren, D. P., and Zhang, X.: Harmonization of global land use change and  
1615 management for the period 850–2100 (LUH2) for CMIP6, *Geosci. Model Dev.*, 13, 5425–5464,  
1616 <https://doi.org/10.5194/gmd-13-5425-2020>, 2020.
- 1617 IEA/OECD: International Energy Agency/Organisation for Economic Cooperation and Development: CO<sub>2</sub> emissions from  
1618 fuel combustion, available at: <https://webstore.iea.org/co2-emissions-from-fuel-combustion-2019-highlights>, last access: 21  
1619 January 2025, 2019.

- 1620 Iida, Y., Kojima, A., Takatani, Y., Nakano, T., Sugimoto, H., Midorikawa, T., and Ishii, M.: Trends in pCO<sub>2</sub> and sea–air  
1621 CO<sub>2</sub> flux over the global open oceans for the last two decades, *J Oceanogr*, 71, 637–661, [https://doi.org/10.1007/s10872-](https://doi.org/10.1007/s10872-015-0306-4)  
1622 015-0306-4, 2015.
- 1623 Ilyina, T., Six, K. D., Segschneider, J., Maier-Reimer, E., Li, H., and Núñez-Riboni, I.: Global ocean biogeochemistry model  
1624 HAMOCC: Model architecture and performance as component of the MPI-Earth system model in different CMIP5  
1625 experimental realizations: The Model Hamoccc within Mpi-Esm in Cmpip5, *J. Adv. Model. Earth Syst.*, 5, 287–315,  
1626 <https://doi.org/10.1029/2012MS000178>, 2013.
- 1627 Inness, A., Ades, M., Agustí-Panareda, A., Barré, J., Benedictow, A., Blechschmidt, A.-M., Dominguez, J. J., Engelen, R.,  
1628 Eskes, H., Flemming, J., Huijnen, V., Jones, L., Kipling, Z., Massart, S., Parrington, M., Peuch, V.-H., Razinger, M., Remy,  
1629 S., Schulz, M., and Suttie, M.: The CAMS reanalysis of atmospheric composition, 19, 3515–3556,  
1630 <https://doi.org/10.5194/acp-19-3515-2019>, 2019.
- 1631 Intergovernmental Panel on Climate Change (IPCC): Climate Change 2021: The Physical Science Basis. Contribution of  
1632 Working Group I to the Sixth Assessment Report of the Intergovernmental Panel on Climate Change. Edited by V. Masson-  
1633 Delmotte, P. Zhai, A. Pirani, S. L. Connors, C. Péan, S. Berger, N. Caud, Y. Chen, L. Goldfarb, M. I. Gomis, M. Huang, K.  
1634 Leitzell, E. Lonnoy, J. B. R. Matthews, T. K. Maycock, T. Waterfield, O. Yelekçi, R. Yu, and B. Zhou. Cambridge  
1635 University Press, Cambridge, UK and New York, NY, USA. <https://doi.org/10.1017/9781009157896>, 2021.
- 1636 Intergovernmental Panel on Climate Change (IPCC): 2006 IPCC Guidelines for National Greenhouse Gas Inventories,  
1637 Prepared by the National Greenhouse Gas Inventories Programme, Eggleston H.S., Buendia L., Miwa K., Ngara T. and  
1638 Tanabe K. (eds). Published: IGES, Japan, 2006.
- 1639 Ishii, M., and M., Kimoto: Reevaluation of historical ocean heat content variations with time-varying XBT and MBT depth  
1640 bias corrections. *Journal of Oceanography*, 65(3), 287–299, 2009.
- 1641 Iversen, C. M., McCormack, M. L., Powell, A. S., Blackwood, C. B., Freschet, G. T., Kattge, J., Roumet, C., Stover, D. B.,  
1642 Soudzilovskaia, N. A., Valverde-Barrantes, O. J., van Bodegom, P. M., & Violle, C. (2017). A global fine-root ecology  
1643 database to address below-ground challenges in plant ecology. *New Phytologist*, 215, 15–26.  
1644 <https://doi.org/10.1111/nph.14486>
- 1645 Jackson, R. B., Lajtha, K., Crow, S. E., Hugelius, G., Kramer, M. G., & Piñeiro, G. (2017). The ecology of soil carbon:  
1646 pools, vulnerabilities, and biotic and abiotic controls. *Annual Review of Ecology, Evolution, and Systematics*, 48, 419–445.  
1647 <https://doi.org/10.1146/annurev-ecolsys-112414-054234>
- 1648 Jähne, B.: Air-Sea Gas Exchange, in: *Encyclopedia of Ocean Sciences*, Elsevier, 1–13, [https://doi.org/10.1016/B978-0-12-](https://doi.org/10.1016/B978-0-12-409548-9.11613-6)  
1649 409548-9.11613-6, 2019.
- 1650 Jähne, B. and Haußecker, H.: Air-water gas exchange, *Annu. Rev. Fluid Mech.*, 30, 443–468,  
1651 <https://doi.org/10.1146/annurev.fluid.30.1.443>, 1998.
- 1652 JODI: Joint Organisations Data Initiative, available at: <https://www.jodidata.org>, last access: 21 January 2025, 2022.
- 1653 Jones, M.W., Andrew, R.M., Peters, G.P. et al., 2021: Gridded fossil CO<sub>2</sub> emissions and related O<sub>2</sub> combustion consistent  
1654 with national inventories 1959–2018. *Sci Data* 8, 2. <https://doi.org/10.1038/s41597-020-00779-6>
- 1655 Jones, M. W., Andrew, R. M., Peters, G. P., Janssens-Maenhout, G., De-Gol, A. J., Dou, X., Liu, Z., Pickers, P., Ciais, P.,  
1656 Patra, P. K., Chevallier, F., and Le Quéré, C.: Gridded fossil CO<sub>2</sub> emissions and related O<sub>2</sub> combustion consistent with  
1657 national inventories 1959-2022, Zenodo [dataset], <https://doi.org/10.5281/zenodo.8386803>, 2023.
- 1658 Jung, M., Reichstein, M., Schwalm, C. R., Huntingford, C., Sitch, S., Ahlström, A., Arneeth, A., Camps-Valls, G., Ciais, P.,  
1659 Friedlingstein, P., Gans, F., Ichii, K., Jain, A. K., Kato, E., Papale, D., Poulter, B., Raduly, B., Rödenbeck, C., Tramontana,  
1660 G., Viovy, N., Wang, Y.-P., Weber, U., Zaehle, S., and Zeng, N.: Compensatory water effects link yearly global land CO<sub>2</sub>  
1661 sink changes to temperature, *Nature*, 541, 516–520, <https://doi.org/10.1038/nature20780>, 2017.
- 1662 Keppler, L., Landschützer, P., Lauvset, S. K., and Gruber, N.: Recent Trends and Variability in the Oceanic Storage of  
1663 Dissolved Inorganic Carbon, *Global Biogeochemical Cycles*, 37, e2022GB007677, <https://doi.org/10.1029/2022GB007677>,  
1664 2023.
- 1665 Keeling, R. F. and Manning, A. C.: 5.15 - Studies of Recent Changes in Atmospheric O<sub>2</sub> Content, in: *Treatise on*  
1666 *Geochemistry (Second Edition)*, edited by: Holland, H. D. and Turekian, K. K., Elsevier, Oxford, 385–404,  
1667 <https://doi.org/10.1016/B978-0-08-095975-7.00420-4>, 2014.
- 1668 Khatiwala, S., Tanhua, T., Mikaloff Fletcher, S., Gerber, M., Doney, S. C., Graven, H. D., Gruber, N., McKinley, G. A.,  
1669 Murata, A., Ríos, A. F., & Sabine, C. L. (2013). Global ocean storage of anthropogenic carbon. *Biogeosciences*, 10(4),  
1670 2169–2191. <https://doi.org/10.5194/bg-10-2169-2013>

- 1671 Klein Goldewijk, K., Beusen, A., Doelman, J., and Stehfest, E.: Anthropogenic land use estimates for the Holocene – HYDE  
1672 3.2, *Earth Syst. Sci. Data*, 9, 927–953, <https://doi.org/10.5194/essd-9-927-2017>, 2017a.
- 1673 Klein Goldewijk, K., Dekker, S. C., and van Zanden, J. L.: Per-capita estimations of long-term historical land use and the  
1674 consequences for global change research, *J. Land Use Sci.*, 12, 313–337, <https://doi.org/10.1080/1747423X.2017.1354938>,  
1675 2017b.
- 1676 Knauer, J., Zaehle, S., Medlyn, B. E., Reichstein, M., Williams, C. A., Migliavacca, M., De Kauwe, M. G., Werner, C.,  
1677 Keitel, C., Kolari, P., Limousin, J., and Linderson, M.: Towards physiologically meaningful water-use efficiency estimates  
1678 from eddy covariance data, *Global Change Biology*, 24, 694–710, <https://doi.org/10.1111/gcb.13893>, 2018.
- 1679 Kobayashi, S., Ota, Y., Harada, Y., Ebita, A., Moriya, M., Onoda, H., Onogi, K., Kamahori, H., Kobayashi, C., Endo, H.,  
1680 Miyaoka, K., and Takahashi, K.: The JRA-55 Reanalysis: General Specifications and Basic Characteristics, *Journal of the  
1681 Meteorological Society of Japan*, 93, 5–48, <https://doi.org/10.2151/jmsj.2015-001>, 2015.
- 1682 Koven, C., Hugelius, G., Lawrence, D. et al. Higher climatological temperature sensitivity of soil carbon in cold than warm  
1683 climates. *Nature Clim Change* 7, 817–822, <https://doi.org/10.1038/nclimate3421>, 2017,
- 1684 Lamboll, R. D., Jones, C. D., Skeie, R. B., Fiedler, S., Samset, B. H., Gillett, N. P., Rogelj, J., Forster, P. M.: Modifying  
1685 emissions scenario projections to account for the effects of COVID-19: protocol for CovidMIP, *Geosci. Model Dev.*, 14,  
1686 3683–3695, <https://doi.org/10.5194/gmd-14-3683-2021>, 2021.
- 1687 Landschützer, P., Gruber, N., Bakker, D. C. E., and Schuster, U.: Recent variability of the global ocean carbon sink, *Global  
1688 Biogeochem. Cycles*, 28, 927–949, <https://doi.org/10.1002/2014GB004853>, 2014.
- 1689 Landschützer, P., Laruelle, G. G., Roobaert, A., and Regnier, P.: A uniform pCO<sub>2</sub> climatology combining open and coastal  
1690 oceans, 12, 2537–2553, <https://doi.org/10.5194/essd-12-2537-2020>, 2020.
- 1691 Lasslop, G., Reichstein, M., Papale, D., Richardson, A. D., Arneeth, A., Barr, A., Stoy, P., and Wohlfahrt, G.: Separation of  
1692 net ecosystem exchange into assimilation and respiration using a light response curve approach: critical issues and global  
1693 evaluation: Separation of NEE into GPP and RECO, *Glob. Change Biol.*, 16, 187–208, [https://doi.org/10.1111/j.1365-  
1694 2486.2009.02041.x](https://doi.org/10.1111/j.1365-2486.2009.02041.x), 2010.
- 1695 Lauvset, S. K., Key, R. M., Olsen, A., van Heuven, S., Velo, A., Lin, X., Schirnack, C., Kozyr, A., Tanhua, T., Hoppema,  
1696 M., Jutterström, S., Steinfeldt, R., Jeansson, E., Ishii, M., Perez, F. F., Suzuki, T., and Watelet, S.: A new global interior  
1697 ocean mapped climatology: the 1° × 1° GLODAP version 2, *Earth System Science Data*, 8, 325–340,  
1698 <https://doi.org/10.5194/essd-8-325-2016>, 2016.
- 1699 Lauvset, S. K., Lange, N., Tanhua, T., Bittig, H. C., Olsen, A., Kozyr, A., Alin, S., Álvarez, M., Azetsu-Scott, K., Barbero,  
1700 L., Becker, S., Brown, P. J., Carter, B. R., Da Cunha, L. C., Feely, R. A., Hoppema, M., Humphreys, M. P., Ishii, M.,  
1701 Jeansson, E., Jiang, L.-Q., Jones, S. D., Lo Monaco, C., Murata, A., Müller, J. D., Pérez, F. F., Pfeil, B., Schirnack, C.,  
1702 Steinfeldt, R., Suzuki, T., Tilbrook, B., Ulfsbo, A., Velo, A., Woosley, R. J., and Key, R. M.: GLODAPv2.2022: the latest  
1703 version of the global interior ocean biogeochemical data product, *Earth Syst. Sci. Data*, 14, 5543–5572,  
1704 <https://doi.org/10.5194/essd-14-5543-2022>.
- 1705 Lauvset, S. K., Lange, N., Tanhua, T., Bittig, H. C., Olsen, A., Kozyr, A., Álvarez, M., Azetsu-Scott, K., Brown, P. J.,  
1706 Carter, B. R., Cotrim da Cunha, L., Hoppema, M., Humphreys, M. P., Ishii, M., Jeansson, E., Murata, A., Müller, J. D.,  
1707 Pérez, F. F., Schirnack, C., Steinfeldt, R., Suzuki, T., Ulfsbo, A., Velo, A., Woosley, R. J., and Key, R. M.: The annual  
1708 update GLODAPv2.2023: the global interior ocean biogeochemical data product, *Earth Syst. Sci. Data*, 16, 2047–2072,  
1709 <https://doi.org/10.5194/essd-16-2047-2024>, 2024
- 1710 Lienert, S. and Joos, F.: A Bayesian ensemble data assimilation to constrain model parameters and land-use carbon  
1711 emissions, *Biogeosciences*, 15, 2909–2930, <https://doi.org/10.5194/bg-15-2909-2018>, 2018.
- 1712 Li, H., Ilyina, T., Loughran, T., Spring, A., and Pongratz, J.: Reconstructions and predictions of the global carbon budget  
1713 with an emission-driven Earth system model, *Earth Syst. Dyn.*, 14, 101–119, <https://doi.org/10.5194/esd-14-101-2023>, 2023.
- 1714 Liptak, J., Keppel-Aleks, G., and Lindsay, K. (2017) Drivers of multi-century trends in the atmospheric CO<sub>2</sub> mean annual  
1715 cycle in a prognostic ESM. *Biogeosciences*, 14, 1383–1401 [https://bg.copernicus.org/articles/14/1383/2017/bg-14-1383-  
1716 2017.pdf](https://bg.copernicus.org/articles/14/1383/2017/bg-14-1383-2017.pdf)
- 1717 Liu, Z., Ciais, P., Deng, Z., Davis, S. J., Zheng, B., Wang, Y., Cui, D., Zhu, B., Dou, X., Ke, P., Sun, T., Guo, R., Zhong, H.,  
1718 Boucher, O., Bréon, F.-M., Lu, C., Guo, R., Xue, J., Boucher, E., Tanaka, K., and Chevallier, F.: Carbon Monitor, a near-  
1719 real-time daily dataset of global CO<sub>2</sub> emission from fossil fuel and cement production, *Sci Data*, 7, 392,  
1720 <https://doi.org/10.1038/s41597-020-00708-7>, 2020a.

- 1721 Liu, Z., Ciais, P., Deng, Z., Lei, R. Davis, S. J., Feng, S., Zheng, B., Cui, D., Dou, X., Zhu, B., Guo, R., Ke, P., Sun, T., Lu,  
1722 C., He, P., Wang, Y., Yue, X., Wang, Y., Lei, Y., Zhou, H., Cai, Z., Wu, Y., Guo, R., Han, T., Xue, J., Boucher, O.,  
1723 Boucher, E., Chevallier, F., Tanaka, K., Wei, Y., Zhong, H., Kang, C., Zhang, N., Chen, B., Xi, F., Liu, M., Bréon, F.-M.,  
1724 Lu, Y., Zhang, Q., Guan, D., Gong, P., Kammen, D. M., He, K., and Schellnhuber, H. J.: Near-real-time monitoring of  
1725 global CO<sub>2</sub> emissions reveals the effects of the COVID-19 pandemic, *Nat Commun*, 11, 5172,  
1726 <https://doi.org/10.1038/s41467-020-18922-7>, 2020b.
- 1727 Locarnini, R.A., A.V. Mishonov, O.K. Baranova, J.R. Reagan, T.P. Boyer, D. Seidov, Z. Wang, H.E. Garcia, C. Bouchard,  
1728 S.L. Cross, C.R. Paver, and D. Dukhovskoy. *World Ocean Atlas 2023, Volume 1: Temperature*. A. Mishonov Technical Ed.  
1729 NOAA Atlas NESDIS 89, [doi.org/10.25923/54bh-1613](https://doi.org/10.25923/54bh-1613)
- 1730 Lueker, T. J., Dickson, A. G., and Keeling, C. D.: Ocean pCO<sub>2</sub> calculated from dissolved inorganic carbon, alkalinity, and  
1731 equations for K<sub>1</sub> and K<sub>2</sub>: validation based on laboratory measurements of CO<sub>2</sub> in gas and seawater at equilibrium, *Mar.*  
1732 *Chem.*, 70, 105–119, [https://doi.org/10.1016/S0304-4203\(00\)00022-0](https://doi.org/10.1016/S0304-4203(00)00022-0), 2000.
- 1733 Ma, L., Hurtt, G. C., Chini, L. P., Sahajpal, R., Pongratz, J., Frohling, S., Stehfest, E., Klein Goldewijk, K., O’Leary, D., and  
1734 Doelman, J. C.: Global rules for translating land-use change (LUH2) to land-cover change for CMIP6 using GLM2, *Geosci.*  
1735 *Model Dev.*, 13, 3203–3220, <https://doi.org/10.5194/gmd-13-3203-2020>, 2020.
- 1736 Maki, T., Ikegami, M., Fujita, T., Hirahara, T., Yamada, K., Mori, K., Takeuchi, A., Tsutsumi, Y., Suda, K., and Conway, T.  
1737 J.: New technique to analyse global distributions of CO<sub>2</sub> concentrations and fluxes from non-processed observational data,  
1738 *Tellus B.*, 62, 797–809, <https://doi.org/10.1111/j.1600-0889.2010.00488.x>, 2010.
- 1739 MapBiomas Brasil. Collection 9 of annual maps of land cover and land use in Brazil, accessed on 04/2025 through the link:  
1740 <https://brasil.mapbiomas.org/estatisticas/>
- 1741 MapBiomas Indonesia. Collection 3 of annual maps of land cover and land use in Indonesia, accessed on 03/2025 through  
1742 the link: <https://platform.indonesia.mapbiomas.org/>
- 1743 McCarthy, G. D., Smeed, D. A., Johns, W. E., Frajka-Williams, E., Moat, B. I., Rayner, D., Baringer, M. O., Meinen, C. S.,  
1744 Collins, J., & Bryden, H. L. (2015). Measuring the Atlantic Meridional Overturning Circulation at 26°N. *Progress in*  
1745 *Oceanography*, 130, 91–111. <https://doi.org/10.1016/j.pocan.2014.10.006>
- 1746 Mokany, K., Raison, R. J., & Prokushkin, A. S. (2006). Critical analysis of root:shoot ratios in terrestrial biomes. *Global*  
1747 *Change Biology*, 15, 129-144. doi: 10.1111/j.1365-2486.2005.001043.x
- 1748 Manning, A. and Keeling, R. F.: Global oceanic and land biotic carbon sinks from the Scripps atmospheric oxygen flask  
1749 sampling network, *Tellus B Chem. Phys. Meteorol.*, 58, 95–116, <https://doi.org/10.1111/j.1600-0889.2006.00175.x>, 2006.
- 1750 Marland, G.: Uncertainties in Accounting for CO<sub>2</sub> From Fossil Fuels, *J. Indust. Ecol.*, 12, 136–139,  
1751 <https://doi.org/10.1111/j.1530-9290.2008.00014.x>, 2008.
- 1752 Marland, G., Hamal, K., and Jonas, M.: How Uncertain Are Estimates of CO<sub>2</sub> Emissions?, *J. Indust. Ecol.*, 13, 4–7,  
1753 <https://doi.org/10.1111/j.1530-9290.2009.00108.x>, 2009.
- 1754 Martens, B., Miralles, D. G., Lievens, H., Van Der Schalie, R., De Jeu, R. A. M., Fernández-Prieto, D., Beck, H. E., Dorigo,  
1755 W. A., and Verhoest, N. E. C.: GLEAM v3: satellite-based land evaporation and root-zone soil moisture, *Geosci. Model*  
1756 *Dev.*, 10, 1903–1925, <https://doi.org/10.5194/gmd-10-1903-2017>, 2017.
- 1757 Mauritsen, T. et al.: Developments in the MPI-M Earth System Model version 1.2 (MPI-ESM1. 2) and its response to  
1758 increasing CO<sub>2</sub>. *Journal of Advances in Modeling Earth Systems*, 11 (4), 998–1038, 2019.
- 1759 McNeil, B. I.: Anthropogenic CO<sub>2</sub> Uptake by the Ocean Based on the Global Chlorofluorocarbon Data Set, *Science*, 299,  
1760 235–239, <https://doi.org/10.1126/science.1077429>, 2003.
- 1761 Mikaloff Fletcher, S. E., Gruber, N., Jacobson, A. R., Doney, S. C., Dutkiewicz, S., Gerber, M., Follows, M., Joos, F.,  
1762 Lindsay, K., Menemenlis, D., Mouchet, A., Müller, S. A., and Sarmiento, J. L.: Inverse estimates of anthropogenic CO<sub>2</sub>  
1763 uptake, transport, and storage by the ocean, *Glob. Biogeochem. Cycles*, 20, GB2002,  
1764 <https://doi.org/10.1029/2005GB002530>, 2006.
- 1765 Miralles, D. G., Holmes, T. R. H., De Jeu, R. A. M., Gash, J. H., Meesters, A. G. C. A., and Dolman, A. J.: Global land-  
1766 surface evaporation estimated from satellite-based observations, *Hydrol. Earth Syst. Sci.*, 15, 453–469,  
1767 <https://doi.org/10.5194/hess-15-453-2011>, 2011.
- 1768 Moat B.I.; Smeed D.A.; Rayner D.; Johns W.E.; Smith, R.; Volkov, D.; Elipot S.; Petit T.; Kajtar J.; Baringer M. O.; and  
1769 Collins, J. (2025). Atlantic meridional overturning circulation observed by the RAPID-MOCHA-WBTS (RAPID-Meridional  
1770 Overturning Circulation and Heatflux Array-Western Boundary Time Series) at 26N from 2004 to 2024 (v2024.1),

- 1771 British Oceanographic Data Centre - Natural Environment Research Council, UK. doi: 10.5285/3f24651e-2d44-dee3-e063-  
1772 7086abc0395e
- 1773 Mu, Q., Zhao, M., and Running, S. W.: Improvements to a MODIS global terrestrial evapotranspiration algorithm, *Remote  
1774 Sensing of Environment*, 115, 1781–1800, <https://doi.org/10.1016/j.rse.2011.02.019>, 2011.
- 1775 Müller, J. and Joos, F.: Global peatland area and carbon dynamics from the Last Glacial Maximum to the present – a  
1776 process-based model investigation, *Biogeosciences*, 17, 5285–5308, <https://doi.org/10.5194/bg-17-5285-2020>, 2020.
- 1777 Müller, J. and Joos, F.: Committed and projected future changes in global peatlands – continued transient model simulations  
1778 since the Last Glacial Maximum, *Biogeosciences*, 18, 3657–3687, <https://doi.org/10.5194/bg-18-3657-2021>, 2021.
- 1779 Myneni, R. B., Ramakrishna, R., Nemani, R., and Running, S. W.: Estimation of global leaf area index and absorbed par  
1780 using radiative transfer models, *IEEE Trans. Geosci. Remote Sensing*, 35, 1380–1393, <https://doi.org/10.1109/36.649788>,  
1781 1997.
- 1782 Naegler, T.: Reconciliation of excess 14C-constrained global CO2 piston velocity estimates, *Tellus B.*, 61, 372–384,  
1783 <https://doi.org/10.1111/j.1600-0889.2008.00408.x>, 2009.
- 1784 Nakamura, T., Yamazaki, K., Iwamoto, K., Honda, M., Miyoshi, Y., Ogawa, Y., and Ukita, J.: A negative phase shift of the  
1785 winter AO/NAO due to the recent Arctic sea-ice reduction in late autumn, *J. Geophys. Res. Atmos.*, 120, 3209–3227,  
1786 <https://doi.org/10.1002/2014JD022848>, 2015.
- 1787 Narayanan, B., Aguiar, A., and McDougall, R.: Global Trade, Assistance, and Production: The GTAP 9 Data Base, Cent.  
1788 Glob. Trade Anal. Purdue Univ., available at: <https://www.gtap.agecon.purdue.edu/databases/v9/default.asp>, last access: 21  
1789 January 2025, 2015.
- 1790 Nightingale, P. D., Liss, P. S., and Schlosser, P.: Measurements of air-sea gas transfer during an open ocean algal bloom,  
1791 *Geophys. Res. Lett.*, 27, 2117–2120, <https://doi.org/10.1029/2000GL011541>, 2000.
- 1792 Ogunro, O. O., Elliott, S. M., Wingenter, O. W., Deal, C., Fu, W., Collier, N., & Hoffman, F. M. (2018). Evaluating  
1793 Uncertainties in Marine Biogeochemical Models: Benchmarking Aerosol Precursors. *Atmosphere*, 9(5), 184.  
1794 <https://doi.org/10.3390/atmos9050184>
- 1795 Orr, J. C., Najjar, R. G., Aumont, O., Bopp, L., Bullister, J. L., Danabasoglu, G., Doney, S. C., Dunne, J. P., Dutay, J.-C.,  
1796 Graven, H., Griffies, S. M., John, J. G., Joos, F., Levin, I., Lindsay, K., Matear, R. J., McKinley, G. A., Mouchet, A.,  
1797 Oeschies, A., Romanou, A., Schlitzer, R., Tagliabue, A., Tanhua, T., and Yool, A.: Biogeochemical protocols and  
1798 diagnostics for the CMIP6 Ocean Model Intercomparison Project (OMIP), 10, 2169–2199, [https://doi.org/10.5194/gmd-10-  
1799 2169-2017](https://doi.org/10.5194/gmd-10-2169-2017), 2017.
- 1800 Ortega, P., E. Guilyardi, D. Swingedouw, J. Mignot, and S. Nguyen: Reconstructing extreme amoc events through nudging  
1801 of the ocean surface: a perfect model approach. *Climate Dynamics*, 49 (9), 3425–3441, 2017.
- 1802 Peters, G. P., Andrew, R., and Lennox, J.: Constructing an environmentally-extended multi-regional input–output table using  
1803 the GTAP database, *Economic Systems Research*, 23, 131–152, <https://doi.org/10.1080/09535314.2011.563234>, 2011b.
- 1804 Peters, G. P., Davis, S. J., and Andrew, R.: A synthesis of carbon in international trade, *Biogeosciences*, 9, 3247–3276,  
1805 <https://doi.org/10.5194/bg-9-3247-2012>, 2012b.
- 1806 Pongratz, J., Smith, S. M., Schwingshackl, C., Dayathilake, L., Gasser, T., Grassi, G. and Pilli, R.: Chapter 7: Current levels  
1807 of CDR. in *The State of Carbon Dioxide Removal 2024 – 2nd Edition*, <https://doi.org/10.17605/OSF.IOZXSKB>, 2024.
- 1808 Poorter, H., Niklas, K. J., Reich, P. B., Oleksyn, J., Poot, P., & Mommer, L. (2012): Biomass allocation to leaves, stems and  
1809 roots: meta-analyses of interspecific variation and environmental control. *New Phytologist*, 193, 30–50.  
1810 <https://doi.org/10.1111/j.1469-8137.2011.03952.x>
- 1811 Potapov, P., Hansen, M. C., Laestadius, L., Turubanova, S., Yaroshenko, A., Thies, C., Smith, W., Zhuravleva, I.,  
1812 Komarova, A., Minnemeyer, S., and Esipova, E.: The last frontiers of wilderness: Tracking loss of intact forest landscapes  
1813 from 2000 to 2013, *Sci. Adv.*, 3, e1600821, <https://doi.org/10.1126/sciadv.1600821>, 2017.
- 1814 Poulter, B., Freeborn, P. H., Jolly, W. M., and Varner, J. M.: COVID-19 lockdowns drive decline in active fires in  
1815 southeastern United States, *PNAS*, 118, e2105666118, <https://doi.org/10.1073/pnas.2105666118>, 2021.
- 1816 Prather, M.: Interactive comment on “Carbon dioxide and climate impulse response functions for the computation of  
1817 greenhouse gas metrics: a multi-model analysis” by F. Joos et al., *Atmospheric Chem. Phys. Discuss.*, 12, C8465, 2012.

- 1818 Prosperi, P., Bloise, M., Tubiello, F. N., Conchedda, G., Rossi, S., Boschetti, L., Salvatore, M., and Bernoux, M.: New  
1819 estimates of greenhouse gas emissions from biomass burning and peat fires using MODIS Collection 6 burned areas,  
1820 *Climatic Change*, 161, 415–432, <https://doi.org/10.1007/s10584-020-02654-0>, 2020.
- 1821 Qin, Z., Zhu, Y., Canadell, J.G., Chen, M., Li, T., Mishra, U. and Yuan, W.: Global spatially explicit carbon emissions from  
1822 land-use change over the past six decades (1961–2020). *One Earth*, 7(5), pp.835-847, 2024.
- 1823 Qiu, C., Ciais, P., Zhu, D., Guenet, B., Peng, S., Petrescu, A. M. R., Lauerwald, R., Makowski, D., Gallego-Sala, A. V.,  
1824 Charman, D. J., and Brewer, S. C.: Large historical carbon emissions from cultivated northern peatlands, *Sci. Adv.*, 7,  
1825 eabf1332, <https://doi.org/10.1126/sciadv.abf1332>, 2021.
- 1826 Raich, J.W., Potter, C.S. and Bhagawati, D.: Interannual variability in global soil respiration, 1980–94. *Global Change*  
1827 *Biology*, 8(8), pp.800-812, 2002.
- 1828 Rayner, N. A., Parker, D. E., Horton, E. B., Folland, C. K., Alexander, L. V., Rowell, D. P., Kent, E. C., and Kaplan, A.:  
1829 Global analyses of sea surface temperature, sea ice, and night marine air temperature since the late nineteenth century,  
1830 *Journal of Geophysical Research: Atmospheres*, 108, <https://doi.org/10.1029/2002JD002670>, 2003.
- 1831 Rayner, P. J., Enting, I. G., Francey, R. J., and Langenfelds, R.: Reconstructing the recent carbon cycle from atmospheric  
1832 CO<sub>2</sub>, δ<sup>13</sup>C and O<sub>2</sub>/N<sub>2</sub> observations\*, *Tellus B*, 51, 213–232, <https://doi.org/10.1034/j.1600-0889.1999.t01-1-00008.x>,  
1833 1999.
- 1834 Reagan, J.R., D. Seidov, Z. Wang, D. Dukhovskoy, T.P. Boyer, R.A. Locarnini, O.K. Baranova, A.V. Mishonov, H.E.  
1835 Garcia, C. Bouchard, S.L. Cross, and C.R. Paver. *World Ocean Atlas 2023, Volume 2: Salinity*. A. Mishonov, Technical  
1836 Editor, NOAA Atlas NESDIS 90, [doi.org/10.25923/70qt-9574](https://doi.org/10.25923/70qt-9574)
- 1837 Regnier, P., Friedlingstein, P., Ciais, P., Mackenzie, F. T., Gruber, N., Janssens, I. A., Laruelle, G. G., Lauerwald, R.,  
1838 Luysaert, S., Andersson, A. J., Arndt, S., Arnosti, C., Borges, A. V., Dale, A. W., Gallego-Sala, A., Godd ris, Y., Goossens,  
1839 N., Hartmann, J., Heinze, C., Ilyina, T., Joos, F., LaRowe, D. E., Leifeld, J., Meysman, F. J. R., Munhoven, G., Raymond, P.  
1840 A., Spahni, R., Suntharalingam, P., and Thullner, M.: Anthropogenic perturbation of the carbon fluxes from land to ocean,  
1841 *Nature Geosci*, 6, 597–607, <https://doi.org/10.1038/ngeo1830>, 2013.
- 1842 Reichstein, M., Papale, D., Valentini, R., Aubinet, M., Bernhofer, C., Knohl, A., Laurila, T., Lindroth, A., Moors, E.,  
1843 Pilegaard, K., and Seufert, G.: Determinants of terrestrial ecosystem carbon balance inferred from European eddy covariance  
1844 flux sites, *Geophys. Res. Lett.*, 34, L01402, <https://doi.org/10.1029/2006GL027880>, 2007.
- 1845 Rhein, M., Rintoul, S. R., Aoki, S., Campos, E., Chambers, D., Feely, R. A., Gulev, S., Johnson, G. C., Josey, S. A.,  
1846 Kostianoy, A., Mauritzen, C., Roemmich, D., and Talley, L. D.: Observations: Ocean, in: *Climate Change 2013: The*  
1847 *Physical Science Basis. Contribution of Working Group I to the Fifth Assessment Report of the Intergovernmental Panel on*  
1848 *Climate Change* [Stocker, T. F., Qin, D., Plattner, G.-K., Tignor, M., Allen, S. K., Boschung, J., Nauels, A., Xia, Y., Bex, V.,  
1849 and Midgley, P. M. (eds.)], Cambridge University Press, 255–316, ISBN: 9781107057991, 2013.
- 1850 R denbeck, C., Bakker, D. C. E., Gruber, N., Iida, Y., Jacobson, A. R., Jones, S., Landsch tzer, P., Metzl, N., Nakaoka, S.,  
1851 Olsen, A., Park, G.-H., Peylin, P., Rodgers, K. B., Sasse, T. P., Schuster, U., Shutler, J. D., Valsala, V., Wanninkhof, R., and  
1852 Zeng, J.: Data-based estimates of the ocean carbon sink variability – first results of the Surface Ocean CO<sub>2</sub> Mapping  
1853 intercomparison (SOCOM), *Biogeosciences*, 12, 7251–7278, <https://doi.org/10.5194/bg-12-7251-2015>, 2015.
- 1854 R denbeck, C., DeVries, T., Hauck, J., Le Qu r , C., and Keeling, R. F.: Data-based estimates of interannual sea–air CO<sub>2</sub>  
1855 flux variations 1957–2020 and their relation to environmental drivers, *Biogeosciences*, 19, 2627–2652,  
1856 <https://doi.org/10.5194/bg-19-2627-2022>, 2022.
- 1857 Roobaert, A., Laruelle, G. G., Landsch tzer, P., and Regnier, P.: Uncertainty in the global oceanic CO<sub>2</sub> uptake induced by  
1858 wind forcing: quantification and spatial analysis, 15, 1701–1720, <https://doi.org/10.5194/bg-15-1701-2018>, 2018.
- 1859 Rossi, S., Brand o De Melo, J., Ceccherini, G., Alkama, R., and Grassi, G. JRC global proxy maps of managed and  
1860 unmanaged forest (Version 1.0). Zenodo. <https://doi.org/10.5281/zenodo.14549036>. 2024.
- 1861 Rypdal, K., Paciornik, N., Eggleston, S., Goodwin, J., Irving, W., Penman, J., and Woodfield, M.: Volume 1: Introduction to  
1862 the 2006 Guidelines in: 2006 IPCC guidelines for national greenhouse gas inventories, available at: [https://www.ipcc-](https://www.ipcc-nggip.iges.or.jp/public/2006gl/vol1.html)  
1863 [nggip.iges.or.jp/public/2006gl/vol1.html](https://www.ipcc-nggip.iges.or.jp/public/2006gl/vol1.html), last access: 21 January 2025, 2006.
- 1864 Saatchi, S. S., Harris, N. L., Brown, S., Lefsky, M., Mitchard, E. T. A., Salas, W., Zutta, B. R., Buermann, W., Lewis, S. L.,  
1865 Hagen, S., Petrova, S., White, L., Silman, M., and Morel, A.: Benchmark map of forest carbon stocks in tropical regions  
1866 across three continents, *Proceedings of the National Academy of Sciences*, 108, 9899–9904,  
1867 <https://doi.org/10.1073/pnas.1019576108>, 2011.

1868 Sallée, JB., Pellichero, V., Akhoudas, C. et al. Summertime increases in upper-ocean stratification and mixed-layer depth.  
1869 Nature 591, 592–598 (2021). <https://doi.org/10.1038/s41586-021-03303-x>

1870 Santoro, M., and Cartus, O. (2021) ESA Biomass Climate Change Initiative (Biomass\_cci): Global datasets of forest above-  
1871 ground biomass for the years 2010, 2017 and 2018, v3, NERC EDS Centre for Environmental Data Analysis,  
1872 <http://dx.doi.org/10.5285/5f331c418e9f4935b8eb1b836f8a91b8>

1873 Santoro, M., Cartus, O., Quegan, S., Kay H., Lucas, R. M., Araza, A., Herold, M., Labrière, N., Chave, J., Rosenqvist, Å.,  
1874 Tadono, T., Kobayashi, K., Kellndorfer, J., Avitabile, V., Brown, H., Carreiras, J., Campbell, M. J., Cavlovic, J., Conceição  
1875 Bispo, P., Gilani, H., Khan, M. L., Kumar, A., Lewis, S. L., Jingjing Liang, J., Mitchard, E. T. A., Pacheco-Pascagaza, A.  
1876 M., Phillips, O. L., Ryan, C. M., Saikia, P., Schepaschenko, D., Sukhdeo, H., Verbeeck, H., Vieilledent, G., Wijaya, A.,  
1877 Willcock, S. and Seifert, F.M. (2024) Design and performance of the Climate Change Initiative Biomass global retrieval  
1878 algorithm. Science of Remote Sensing. <https://doi.org/10.1016/j.srs.2024.100169>

1879 Sarmiento, J. L., Orr, J. C., and Siegenthaler, U.: A perturbation simulation of CO<sub>2</sub> uptake in an ocean general circulation  
1880 model, J. Geophys. Res.-Oceans., 97, 3621–3645, <https://doi.org/10.1029/91JC02849>, 1992.

1881 Sato, M., Hansen, J. E., McCormick, M. P., and Pollack, J. B.: Stratospheric aerosol optical depths, 1850–1990, Geophys.  
1882 Res.-Atmos., 98, 22987–22994, <https://doi.org/10.1029/93JD02553>, 1993.

1883 Saunio, M., Stavert, A. R., Poulter, B., Bousquet, P., Canadell, J. G., Jackson, R. B., Raymond, P. A., Dlugokencky, E. J.,  
1884 Houweling, S., Patra, P. K., Ciais, P., Arora, V. K., Bastviken, D., Bergamaschi, P., Blake, D. R., Brailsford, G., Bruhwiler,  
1885 L., Carlson, K. M., Carrol, M., Castaldi, S., Chandra, N., Crevoisier, C., Crill, P. M., Covey, K., Curry, C. L., Etiope, G.,  
1886 Frankenberg, C., Gedney, N., Hegglin, M. I., Höglund-Isaksson, L., Hugelius, G., Ishizawa, M., Ito, A., Janssens-Maenhout,  
1887 G., Jensen, K. M., Joos, F., Kleinen, T., Krummel, P. B., Langenfelds, R. L., Laruelle, G. G., Liu, L., Machida, T.,  
1888 Maksyutov, S., McDonald, K. C., McNorton, J., Miller, P. A., Melton, J. R., Morino, I., Müller, J., Murguía-Flores, F., Naik,  
1889 V., Niwa, Y., Noce, S., O'Doherty, S., Parker, R. J., Peng, C., Peng, S., Peters, G. P., Prigent, C., Prinn, R., Ramonet, M.,  
1890 Regnier, P., Riley, W. J., Rosentreter, J. A., Segers, A., Simpson, I. J., Shi, H., Smith, S. J., Steele, L. P., Thornton, B. F.,  
1891 Tian, H., Tohjima, Y., Tubiello, F. N., Tsuruta, A., Viovy, N., Voulgarakis, A., Weber, T. S., van Weele, M., van der Werf,  
1892 G. R., Weiss, R. F., Worthy, D., Wunch, D., Yin, Y., Yoshida, Y., Zhang, W., Zhang, Z., Zhao, Y., Zheng, B., Zhu, Q., Zhu,  
1893 Q., and Zhuang, Q.: The Global Methane Budget 2000–2017, Earth Syst. Sci. Data, 12, 1561–1623,  
1894 <https://doi.org/10.5194/essd-12-1561-2020>, 2020.

1895 Schuldt, K. N., Mund, J., Aalto, T., Abshire, J. B., Aikin, K., Allen, G., Andrews, A., Apadula, F., Arnold, S., Baier, B.,  
1896 Bakwin, P., Bartyzel, J., Bentz, G., Bergamaschi, P., Beyersdorf, A., Biermann, T., Biraud, S. C., Blanc, P.-E., Boenisch, H.,  
1897 Bowling, D., Brailsford, G., Brand, W. A., Brunner, D., Bui, T. P., Bäni, L., Calzolari, F., Chang, C. S., Chen, H., Chen, G.,  
1898 Chmura, L., Clark, S., Climadat, S., Colomb, A., Commane, R., Conen, F., Conil, S., Couret, C., Cristofanelli, P., Cuevas,  
1899 E., Curcoll, R., Daube, B., Davis, K. J., De Mazière, M., De Wekker, S., Dean-Day, J. M., Della Coletta, J., Delmotte, M.,  
1900 Di Iorio, T., DiGangi, E., DiGangi, J. P., Elkins, J. W., Elsasser, M., Emmenegger, L., Fang, S., Fischer, M. L., Forster, G.,  
1901 France, J., Frumau, A., Fuente-Lastra, M., Galkowski, M., Gatti, L. V., Gehrlein, T., Gerbig, C., Gheusi, F., Gloor, E., Goto,  
1902 D., Griffis, T., Hammer, S., Hanisco, T. F., Hanson, C., Haszpra, L., Hatakka, J., Heimann, M., Heliasz, M., Heltai, D.,  
1903 Henne, S., Hensen, A., Hermans, C., Hermansen, O., Hintsä, E., Hoheisel, A., Holst, J., Iraci, L. T., Ivakhov, V., Jaffe, D.  
1904 A., Jordan, A., Joubert, W., Karion, A., Kawa, S. R., Kazan, V., Keeling, R. F., Keronen, P., Kim, J., Klausen, J., Kneuer, T.,  
1905 Kolari, P., Kominkova, K., Kort, E., Kozlova, E., Krummel, P. B., Kubistin, D., Kulawik, S. S., Kumpps, N., Labuschagne,  
1906 C., Lam, D. H., Lan, X., Langenfelds, R. L., Lanza, A., Laurent, O., Laurila, T., Lauvaux, T., Lavric, J., Law, B. E., Lee, J.,  
1907 Lehner, I., Lehtinen, K., Leppert, R., Leskinen, A., Leuenberger, M., Leung, W. H., Levin, I., Levula, J., Lin, J., Lindauer,  
1908 M., Lindroth, A., Loh, Z. M., Lopez, M., Lunder, C. R., Löfvenius, M. O., Machida, T., Mammarella, I., Manca, G.,  
1909 Manning, A., Manning, A., Marek, M. V., Marklund, P., Marrero, J. E., Martin, D., Martin, M. Y., Martins, G. A., Matsueda,  
1910 H., McKain, K., Meijer, H., Meinhardt, F., Merchant, L., Metzger, J.-M., Mihalopoulos, N., Miles, N. L., Miller, J. B.,  
1911 Müller, C. E., Mitchell, L., Monteiro, V., Montzka, S., Moore, F., Moossen, H., Morgan, E., Morgui, J.-A., Morimoto, S.,  
1912 Munger, J. W., Munro, D., Mutuku, M., Myhre, C. L., Mölder, M., Müller-Williams, J., Necki, J., Newman, S., Nichol, S.,  
1913 Nisbet, E., Niwa, Y., Njiru, D. M., Noe, S. M., Nojiri, Y., O'Doherty, S., Obersteiner, F., Paplawsky, B., Parworth, C. L.,  
1914 Peischl, J., Peltola, O., Peters, W., Philippon, C., Piacentino, S., Pichon, J. M., Pickers, P., Piper, S., Pitt, J., Plass-Dülmer,  
1915 C., Platt, S. M., Prinzivalli, S., Ramonet, M., Ramos, R., Reyes-Sanchez, E., Richardson, S. J., Rigoulet, L.-J., Riris, H.,  
1916 Rivas, P. P., Rothe, M., Roulet, Y.-A., Ryerson, T., Ryoo, J.-M., Sargent, M., Sasakawa, M., Scheeren, B., Schmidt, M.,  
1917 Schuck, T., Schumacher, M., Seibel, J., Seifert, T., Sha, M. K., Shepson, P., Shook, M., Sloop, C. D., Smith, P. D., Spain,  
1918 G., St. Clair, J. M., Steger, D., Steinbacher, M., Stephens, B., Sweeney, C., Sørensen, L. L., Taipale, R., Takatsuji, S., Tans,  
1919 P., Thoning, K., Timas, H., Torn, M., Trisolino, P., Turnbull, J., Vermeulen, A., Viner, B., Vitkova, G., Walker, S., Watson,  
1920 A., Weiss, R., Weyrauch, D., Wofsy, S. C., Worsley, J., Worthy, D., Xueref-Remy, I., Yates, E. L., Young, D., Yver-Kwok,  
1921 C., Zaehle, S., Zahn, A., Zellweger, C., Zimnoch, M., de Souza, R. A., di Sarra, A. G., van Dinter, D., and van den Bulk, P.  
1922 (2023) Multi-laboratory compilation of atmospheric carbon dioxide data for the period 1957-2022;  
1923 [obspace\\_co2\\_1\\_GLOBALVIEWplus\\_v9.0\\_2023-09-09](https://doi.org/10.25925/20230801); NOAA Earth System Research Laboratory, Global Monitoring  
1924 Laboratory. <http://doi.org/10.25925/20230801>.

1925 Schuldt, K. N., Jacobson, A. R., Aalto, T., Andrews, A., Apadula, F., Arnold, S., Bakwin, P., Bartyzel, J., Bergamaschi, P.,  
1926 Biermann, T., Biraud, S. C., Blanc, P.-E., Bäni, L., Calzolari, F., Chen, H., Chmura, L., Colomb, A., Condori, L., Conen, F.,  
1927 Conil, S., Couret, C., Cristofanelli, P., Cuevas, E., De Mazière, M., De Wekker, S., Della Coletta, J., Delmotte, M., Di Iorio,

- 1928 T., Elsasser, M., Emmenegger, L., Fischer, M. L., Forster, G., Frumau, A., Fuente-Lastra, M., Galkowski, M., Gheusi, F.,  
1929 Hammer, S., Hatakka, J., Heliasz, M., Heltai, D., Hensen, A., Hermans, C., Hermansen, O., Hoheisel, A., Holst, J., Jaffe, D.  
1930 A., Karion, A., Kazan, V., Keronen, P., Kneuer, T., Kolari, P., Kominkova, K., Krummel, P. B., Kubistin, D., Kumps, N.,  
1931 Lan, X., Langenfelds, R. L., Lanza, A., Laurent, O., Laurila, T., Lee, J., Lehner, I., Lehtinen, K., Leskinen, A., Leuenberger,  
1932 M., Levin, I., Levula, J., Lindauer, M., Lindroth, A., Loh, Z. M., Lopez, M., Lunder, C. R., Löfvenius, M. O., Mammarella,  
1933 I., Manca, G., Manning, A., Manning, A., Marek, M. V., Marklund, P., McKain, K., Meijer, H., Meinhardt, F., Metzger, J.-  
1934 M., Miller, C. E., Miller, J. B., Myhre, C. L., Mölder, M., Müller-Williams, J., Necki, J., O'Doherty, S., Peltola, O.,  
1935 Philippon, C., Piacentino, S., Pichon, J. M., Pickers, P., Pitt, J., Plass-Dülmer, C., Platt, S. M., Ramonet, M., Ramos, R.,  
1936 Reyes-Sanchez, E., Rigouleau, L.-J., Rivas, P. P., Roulet, Y.-A., Scheeren, B., Schmidt, M., Schumacher, M., Sha, M. K.,  
1937 Sloop, C. D., Smith, P. D., Steger, D., Steinbacher, M., Sweeney, C., Sørensen, L. L., Taipale, R., Tans, P., Thoning, K.,  
1938 Trisolino, P., Turnbull, J., Vermeulen, A., Viner, B., Vitkova, G., Weyrauch, D., Worthy, D., Xueref-Remy, I., Young, D.,  
1939 Yver-Kwok, C., Zimnoch, M., di Sarra, A. G., van Dinter, D., and van den Bulk, P. (2024) Multi-laboratory compilation of  
1940 atmospheric carbon dioxide data for the period 2023-2024; obspack\_co2\_1\_NRT\_v9.2\_2024-03-25; NOAA Earth System  
1941 Research Laboratory, Global Monitoring Laboratory. <http://doi.org/10.25925/20240215>.
- 1942 Sharp, J. D., Pierrot, D., Humphreys, M. P., Epitalon, J.-M., Orr, J. C., Lewis, E. R., and Wallace, D. W. R.: CO2SYSv3 for  
1943 MATLAB, <https://doi.org/10.5281/ZENODO.3950563>, 2020.
- 1944 Smith, T. M., Reynolds, R. W., Peterson, T. C., & Lawrimore, J.: Improvements to NOAA's historical merged land-ocean  
1945 surface temperature analysis (1880–2006). *Journal of climate*, 21(10), 2283-2296, 2008.
- 1946 Sospedra-Alfonso, R., W. J. Merryfield, G. J. Boer, V. V. Kharin, W.-S. Lee, C. Seiler, and J. R. Christian: Decadal climate  
1947 predictions with the canadian earth system model version 5 (canesm5). *Geoscientific Model Development*, 14 (11), 6863–  
1948 6891, 2021.
- 1949 Souza, C. M., Z. Shimbo, J., Rosa, M. R., Parente, L. L., A. Alencar, A., Rudorff, B. F. T., Hasenack, H., Matsumoto, M., G.  
1950 Ferreira, L., Souza-Filho, P. W. M., de Oliveira, S. W., Rocha, W. F., Fonseca, A. V., Marques, C. B., Diniz, C. G., Costa,  
1951 D., Monteiro, D., Rosa, E. R., Vélez-Martin, E., Weber, E. J., Lenti, F. E. B., Paternost, F. F., Pareyn, F. G. C., Siqueira, J.  
1952 V., Viera, J. L., Neto, L. C. F., Saraiva, M. M., Sales, M. H., Salgado, M. P. G., Vasconcelos, R., Galano, S., Mesquita, V.  
1953 V., and Azevedo, T.: Reconstructing Three Decades of Land Use and Land Cover Changes in Brazilian Biomes with  
1954 Landsat Archive and Earth Engine, *Remote Sens.*, 12, 2735, <https://doi.org/10.3390/rs12172735>, 2020.
- 1955 Steinhoff, T., Gkritzalis, T., Jones, S., Macovei, V. A., Neill, C., Schuster, U., Akl, J., Arruda, R., Atamanchuk, D., Barry, M.,  
1956 Beaumont, L., Cantoni, C., Dickson, A., Fahning, J., Fought, J., Frangoulis, C., Gutiérrez-Loza, L., Hagan, C., Honkanen, M.,  
1957 Kielosto, S., Kinski, N., Körtzinger, A., Landschützer, P., Lauvset, S.K., Lawrence-Slavas, N., Li, Q., Luchetta, A., Malarde, D.,  
1958 Paulsen, M., Ritschel, M., Rutgersson, A., Sanders, R., Shitashima, K., Spaulding, R., Stamatakis, N., Stenbäck, K., Sutton, A.,  
1959 Tatkwicz, W., Telszewski, M., Theetaert, H., Tilbrook, B., Wanninkhof, R.: The ICOS OTC pCO<sub>2</sub> instrument intercomparison.  
1960 *Limnology and Oceanography: Methods*, 1-66, <http://doi.org/10.1002/lom3.10727>, 2025.
- 1961 Swart, N. C. et al.: The Canadian Earth System Model version 5 (CanESM5. 0.3). *Geoscientific Model Development*, 12  
1962 (11), 4823–4873, 2019.
- 1963 Tang, X., Fan, S., Zhang, W., Gao, S., Chen, G. and Shi, L.: Global variability in belowground autotrophic respiration in  
1964 terrestrial ecosystems. *Earth System Science Data*, 11(4), pp.1839-1852, 2019.
- 1965 Tang, X., Fan, S., Du, M., Zhang, W., Gao, S., Liu, S., Chen, G., Yu, Z. and Yang, W., 2020. Spatial and temporal patterns  
1966 of global soil heterotrophic respiration in terrestrial ecosystems. *Earth System Science Data*, 12(2), pp.1037-1051.
- 1967 Tatebe, H. et al.: The initialization of the MIROC climate models with hydrographic data assimilation for decadal prediction.  
1968 *Journal of Meteorological Society of Japan*, 90A, 275–294, 2012.
- 1969 Thomason, L. W., Ernest, N., Millán, L., Rieger, L., Bourassa, A., Vernier, J.-P., Manney, G., Luo, B., Arfeuille, F., and  
1970 Peter, T.: A global space-based stratospheric aerosol climatology: 1979–2016, 10, 469–492, <https://doi.org/10.5194/essd-10-469-2018>, 2018.
- 1972 Thurner, M., Beer, C., Santoro, M., Carvalhais, N., Wutzler, T., Schepaschenko, D., Shvidenko, A., Kompter, E., Ahrens, B.,  
1973 Levick, S. R., and Schmillius, C.: Carbon stock and density of northern boreal and temperate forests, *Global Ecology and*  
1974 *Biogeography*, 23, 297–310, <https://doi.org/10.1111/geb.12125>, 2014.
- 1975 Tian, H., Yao, Y., Li, Y., Shi, H., Pan, S., Najjar, R. G., Pan, N., Bian, Z., Ciaia, P., Cai, W., Dai, M., Friedrichs, M. A. M.,  
1976 Li, H., Lohrenz, S., and Leung, L. R.: Increased Terrestrial Carbon Export and CO<sub>2</sub> Evasion From Global Inland Waters  
1977 Since the Preindustrial Era, *Global Biogeochemical Cycles*, 37, e2023GB007776, <https://doi.org/10.1029/2023GB007776>,  
1978 2023.
- 1979 Tohjima, Y., Mukai, H., Machida, T., Hoshina, Y., and Nakaoka, S.-I.: Global carbon budgets  
1980 estimated from atmospheric O<sub>2</sub>/N<sub>2</sub> and CO<sub>2</sub> observations in the western Pacific region  
1981 over a 15-year period, 19, 9269–9285, <https://doi.org/10.5194/acp-19-9269-2019>, 2019.

- 1982 Tramontana, G., Jung, M., Schwalm, C. R., Ichii, K., Camps-Valls, G., Ráduly, B., Reichstein, M., Arain, M. A., Cescatti,  
1983 A., Kiely, G., Merbold, L., Serrano-Ortiz, P., Sickert, S., Wolf, S., and Papale, D.: Predicting carbon dioxide and energy  
1984 fluxes across global FLUXNET sites with regression algorithms, *Biogeosciences*, 13, 4291–4313, <https://doi.org/10.5194/bg-13-4291-2016>, 2016.
- 1986 Tubiello, F., Pekkarinen, A., Branthomme, A., Piccoli, M., Obli-Laryea, G., Ramadan, N., and Conchedda, G.: New  
1987 FAOSTAT forest emissions and removals estimates: 1990–2025, *Earth Syst. Sci. Data Discuss.* [preprint],  
1988 <https://doi.org/10.5194/essd-2025-635>, in review, 2025.
- 1989 UN: United Nations Statistics Division: National Accounts Main Aggregates Database, available at:  
1990 <http://unstats.un.org/unsd/snaama/Introduction.asp>, last access: 21 January 2025, 2021.
- 1991 Uppala, S. M., Kállberg, P. W., Simmons, A. J., Andrae, U., Bechtold, V. D. C., Fiorino, M., ... & Woollen, J.: The ERA-40  
1992 re-analysis. *Quarterly Journal of the Royal Meteorological Society: A journal of the atmospheric sciences, applied*  
1993 *meteorology and physical oceanography*, 131(612), 2961-3012, 2005.
- 1994 van der Werf, G. R., Randerson, J. T., Giglio, L., van Leeuwen, T. T., Chen, Y., Rogers, B. M., Mu, M., van Marle, M. J. E.,  
1995 Morton, D. C., Collatz, G. J., Yokelson, R. J., and Kasibhatla, P. S.: Global fire emissions estimates during 1997–2016,  
1996 *Earth Syst. Sci. Data*, 9, 697–720, <https://doi.org/10.5194/essd-9-697-2017>, 2017
- 1997 Vermote, E. and NOAA CDR Program: NOAA Climate Data Record (CDR) of AVHRR Leaf Area Index (LAI) and  
1998 Fraction of Absorbed Photosynthetically Active Radiation (FAPAR), Version 5, <https://doi.org/10.7289/V5TT4P69>, 2018.
- 1999 Viovy, N.: CRUNCEP data set, available at:  
2000 [ftp://nacp.ornl.gov/synthesis/2009/frescati/temp/land\\_use\\_change/original/readme.htm](ftp://nacp.ornl.gov/synthesis/2009/frescati/temp/land_use_change/original/readme.htm), last access: 21 January 2025, 2016.
- 2001 Wanninkhof, R.: Relationship between wind speed and gas exchange over the ocean, *J. Geophys. Res.-Oceans.*, 97, 7373–  
2002 7382, <https://doi.org/10.1029/92JC00188>, 1992.
- 2003 Wanninkhof, R.: Relationship between wind speed and gas exchange over the ocean revisited, *Limnol. Oceanogr. Methods.*,  
2004 12, 351–362, <https://doi.org/10.4319/lom.2014.12.351>, 2014.
- 2005 Wanninkhof, R., Park, G.-H., Takahashi, T., Sweeney, C., Feely, R., Nojiri, Y., Gruber, N., Doney, S. C., McKinley, G. A.,  
2006 Lenton, A., Le Quééré, C., Heinze, C., Schwinger, J., Graven, H., and Khatiwala, S.: Global ocean carbon uptake: magnitude,  
2007 variability and trends, *Biogeosciences*, 10, 1983–2000, <https://doi.org/10.5194/bg-10-1983-2013>, 2013.
- 2008 Watanabe, M., H. Tatebe, H. Koyama, T. Hajima, M. Watanabe, and M. Kawamiya: Importance of El Niño reproducibility  
2009 for reconstructing historical CO<sub>2</sub> flux variations in the equatorial Pacific. *Ocean Science*, 16, 1431–1442, 2020.
- 2010 Weiss, R. F. and Price, B. A.: Nitrous oxide solubility in water and seawater, *Marine Chemistry*, 8, 347–359,  
2011 [https://doi.org/10.1016/0304-4203\(80\)90024-9](https://doi.org/10.1016/0304-4203(80)90024-9), 1980.
- 2012 Woolf, D. K., P. E. Land, J. D. Shutler, L. M. Goddijn-Murphy, and C. J. Donlon: On the calculation of air-sea fluxes of  
2013 CO<sub>2</sub> in the presence of temperature and salinity gradients, *J. Geophys. Res. Oceans*, 121, 1229–1248,  
2014 <https://doi.org/10.1002/2015JC011427>, 2016.
- 2015 Xia, J., Chen, Y., Liang, S., Liu, D., and Yuan, W.: Global simulations of carbon allocation coefficients for deciduous  
2016 vegetation types, *Tellus B*, 67, 28016, <https://doi.org/10.3402/tellusb.v67.28016>, 2015.
- 2017 Xu, L., Saatchi, S.S., Yang, Y., Yu, Y., Pongratz, J., Bloom, A.A., Bowman, K., Worden, J., Liu, J., Yin, Y., Domke, G.,  
2018 McRoberts, R.E., Woodall, C., Nabuurs, G.-J., de-Miguel, S., Keller, M., Harris, N., Maxwell, S., & Schimel, D. (2021),  
2019 Zenodo, doi:10.5281/zenodo.4161694
- 2020 Yu, Z., Ciais, P., Piao, S., Houghton, R. A., Lu, C., Tian, H., Agathokleous, E., Kattel, G. R., Sitch, S., Goll, D., Yue, X.,  
2021 Walker, A., Friedlingstein, P., Jain, A. K., Liu, S., and Zhou, G.: Forest expansion dominates China’s land carbon sink since  
2022 1980, *Nat. Commun.*, 13, 5374, <https://doi.org/10.1038/s41467-022-32961-2>, 2022.
- 2023 Zeng, J., Nojiri, Y., Landschützer, P., Telszewski, M., and Nakaoka, S.-I.: A global surface ocean fCO<sub>2</sub> climatology based  
2024 on a feed forward neural network, *J. Atmos. Ocean. Tech.*, 31, 1838–1849, <https://doi.org/10.1175/JTECH-D-13-00137.1>,  
2025 2014.
- 2026 Zeng J., Matsunaga T., Tan Z.-H., Saigusa N., Shirai T., Tang Y., Peng S. and Fukuda Y.: Global terrestrial carbon fluxes of  
2027 1999–2019 estimated by upscaling eddy covariance data with a random forest, *Sci. Data*, 7, 1–11,  
2028 <https://doi.org/10.1038/s41597-020-00653-5>, 2020.
- 2029 Zheng, B., Chevallier, F., Yin, Y., Ciais, P., Fortems-Cheiney, A., Deeter, M. N., Parker, R. J., Wang, Y., Worden, H. M.,  
2030 and Zhao, Y.: Global atmospheric carbon monoxide budget 2000–2017 inferred from multi-species atmospheric inversions,  
2031 *Earth Syst. Sci. Data*, 11, 1411–1436, <https://doi.org/10.5194/essd-11-1411-2019>, 2019.

2032 Zuo, H., Balmaseda, M. A., Tietsche, S., Mogensen, K., & Mayer, M.: The ECMWF operational ensemble reanalysis–  
2033 analysis system for ocean and sea ice: a description of the system and assessment. *Ocean science*, 15(3), 779-808, 2019.
